# Supplementary material for: National, regional, and global trends in adult overweight and obesity prevalences
Source: PubMed Central journal article supplement (PMC3543235; doi:10.1186/1478-7954-10-22), 2012-11-20

# High-income, female

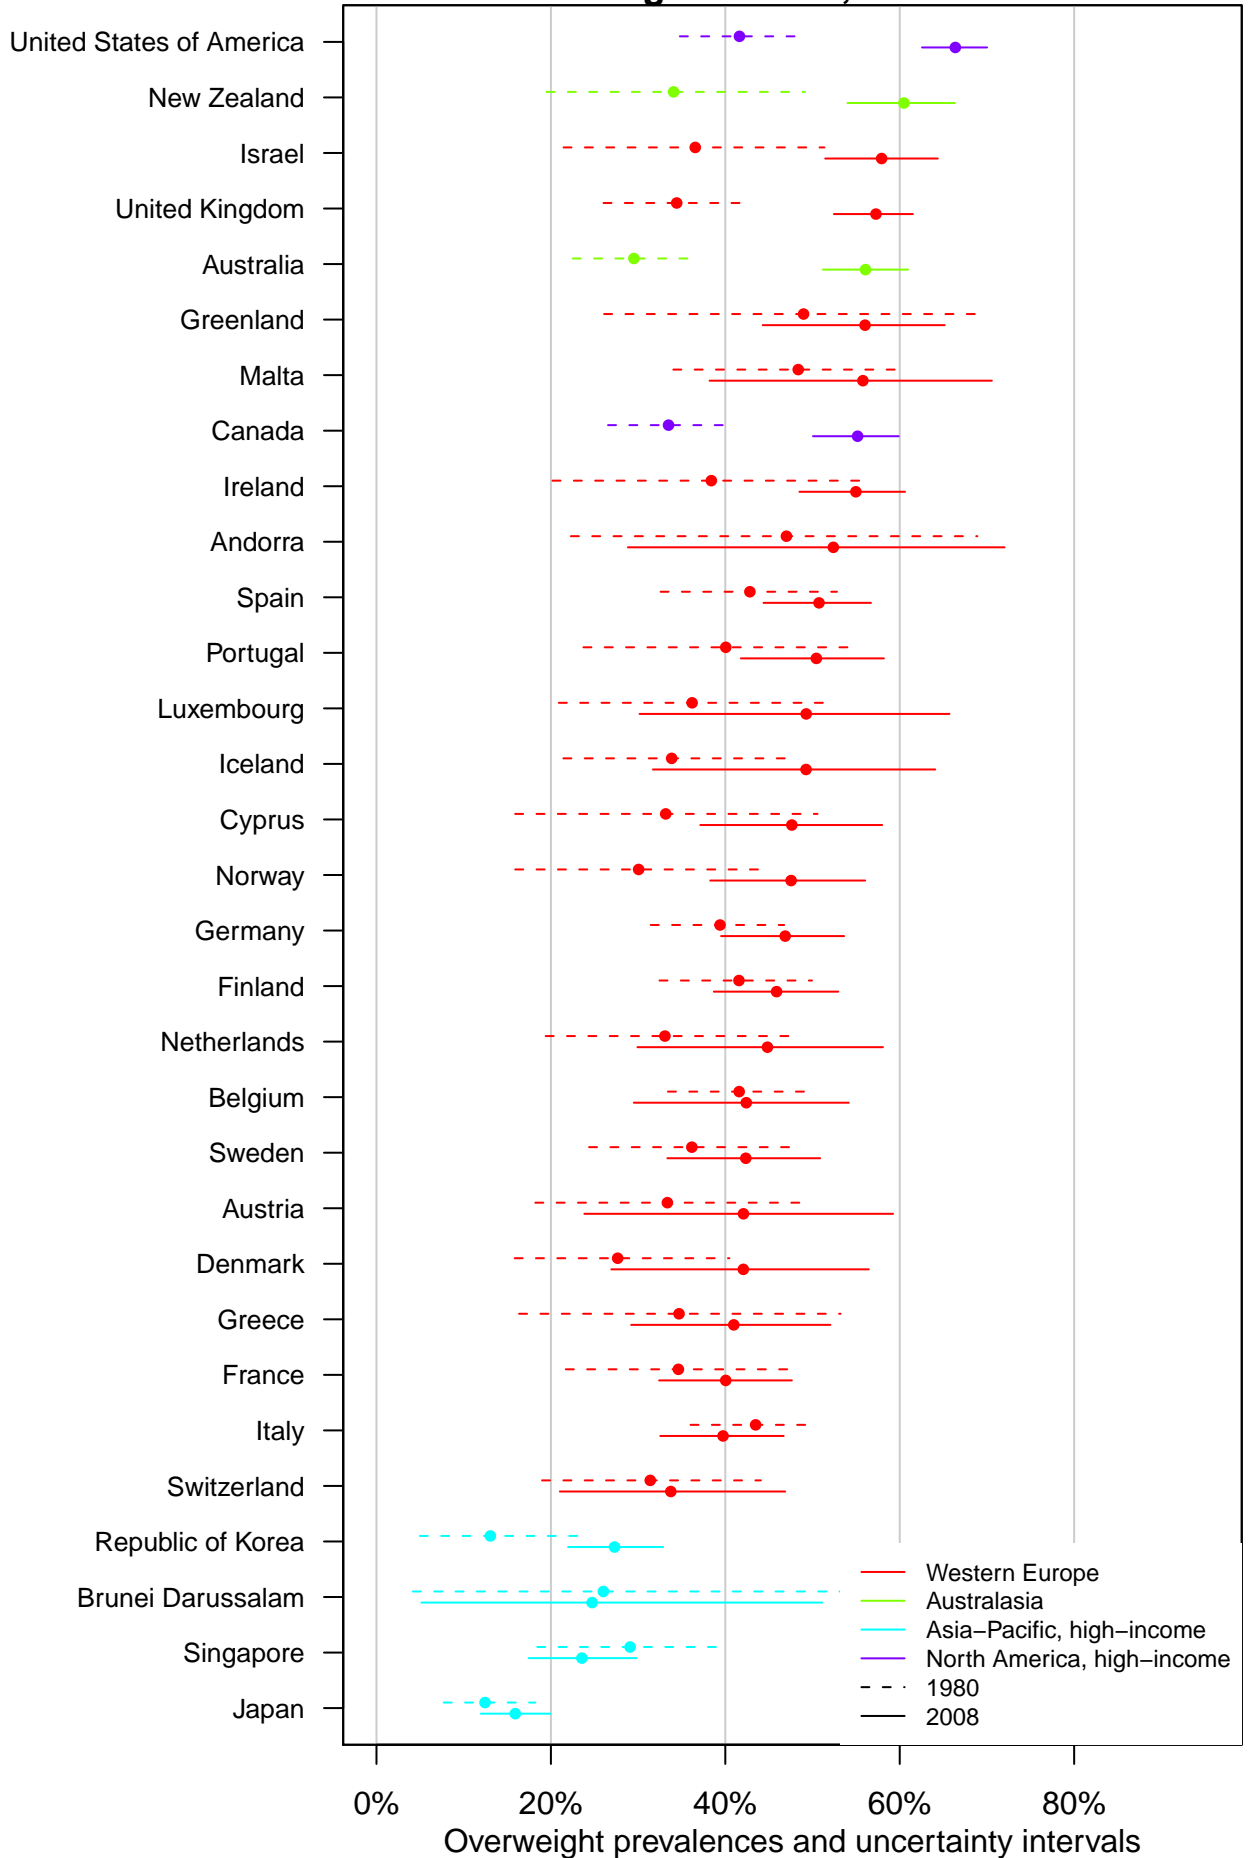

# High-income, male

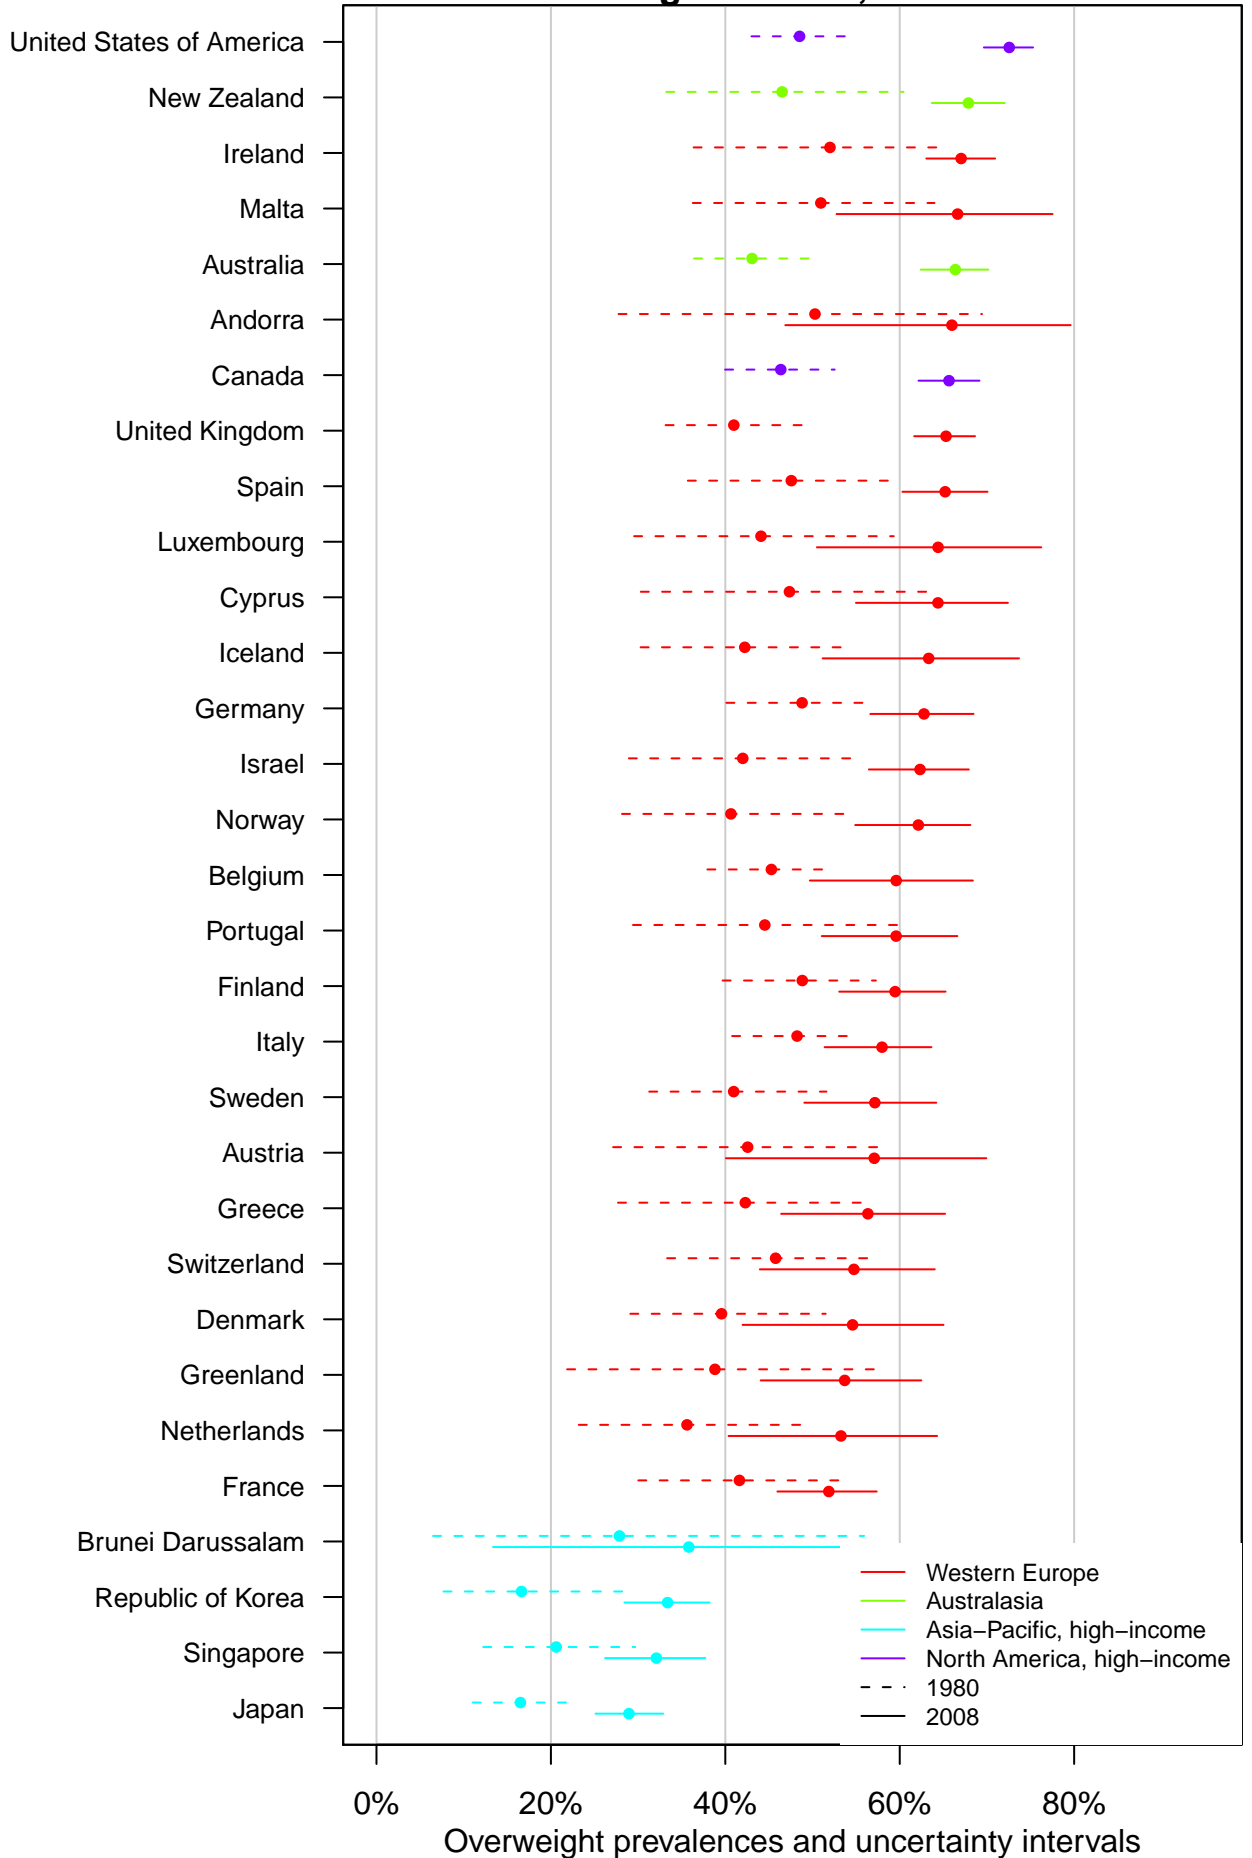

# Central and Eastern Europe and Central Asia, female

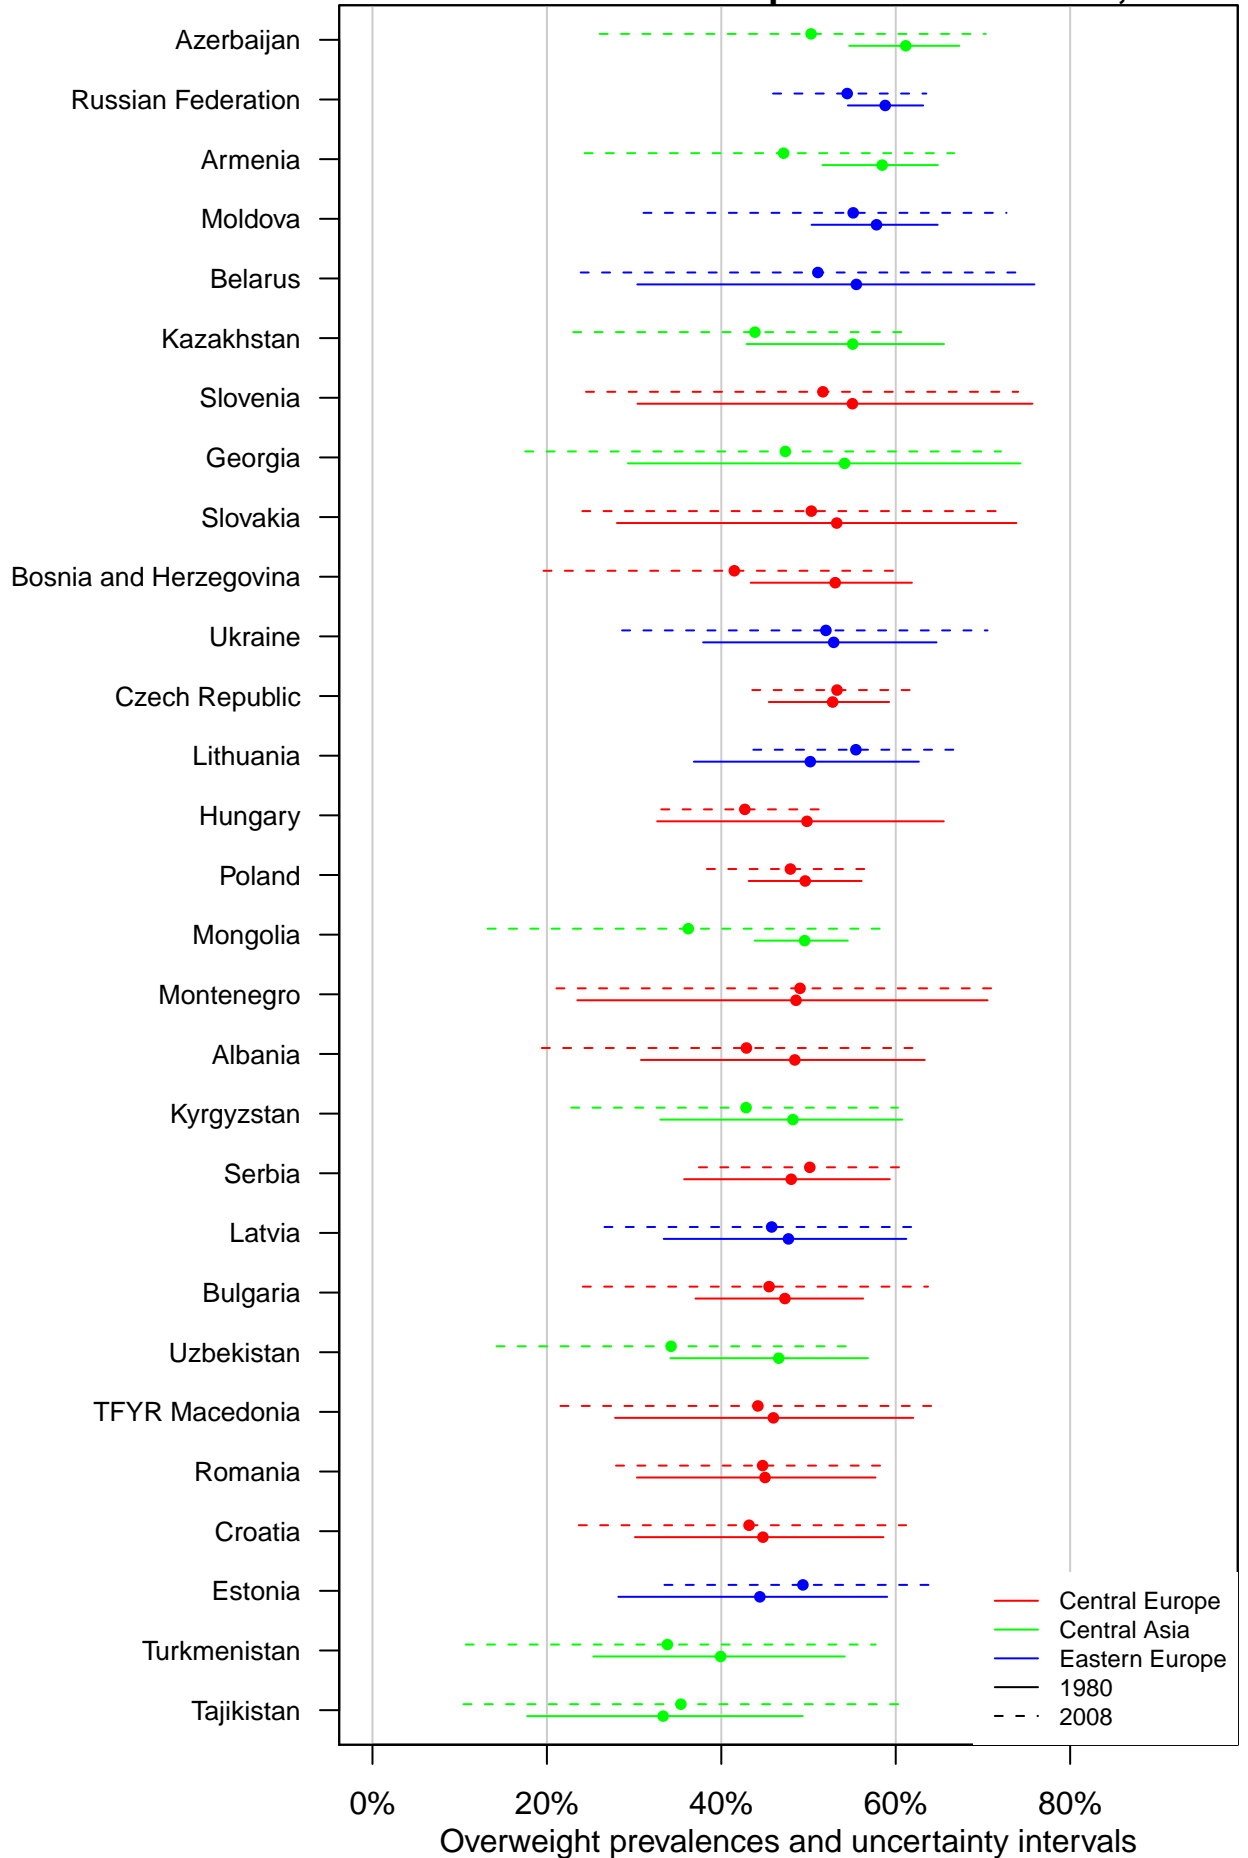

# Central and Eastern Europe and Central Asia, male

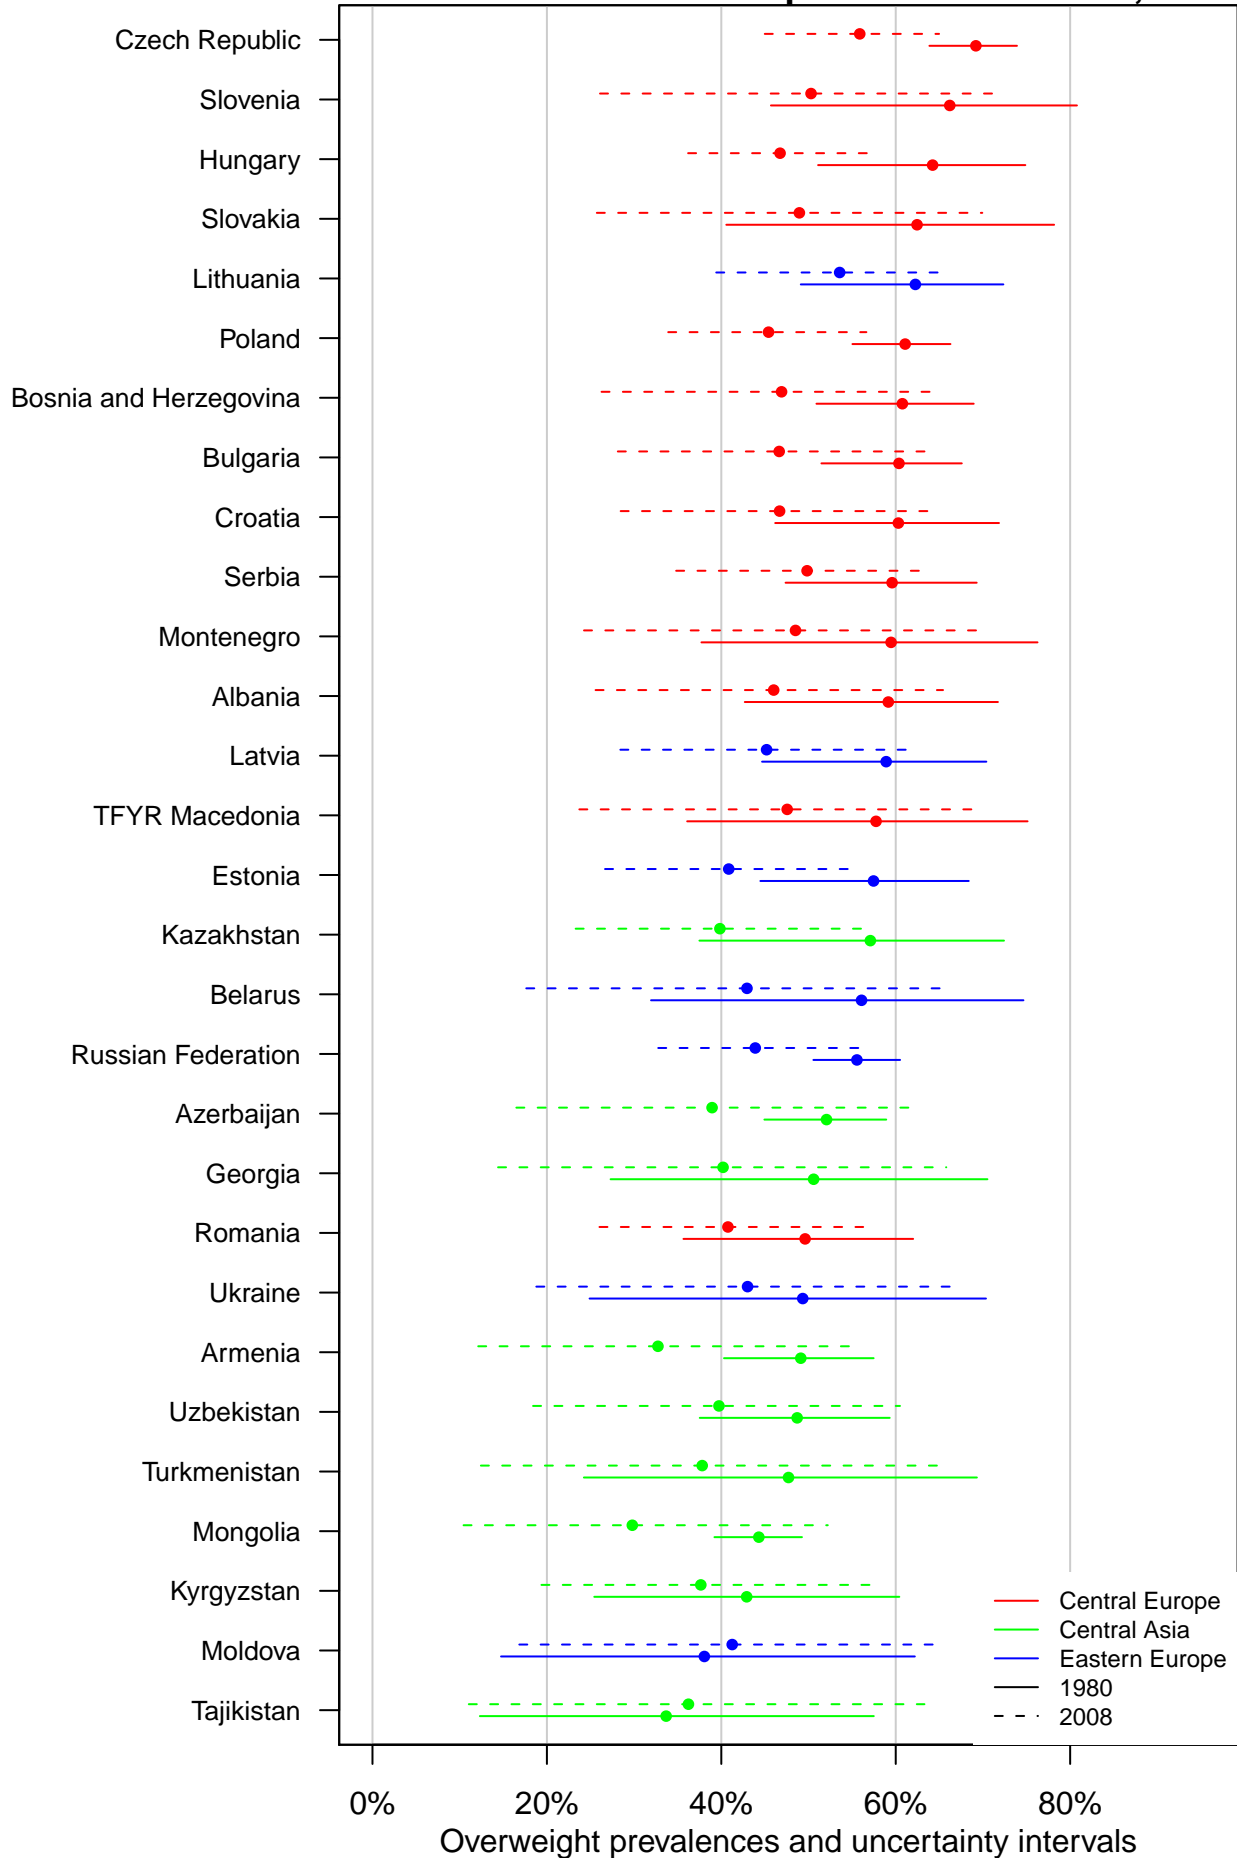

# Sub-Saharan Africa, female

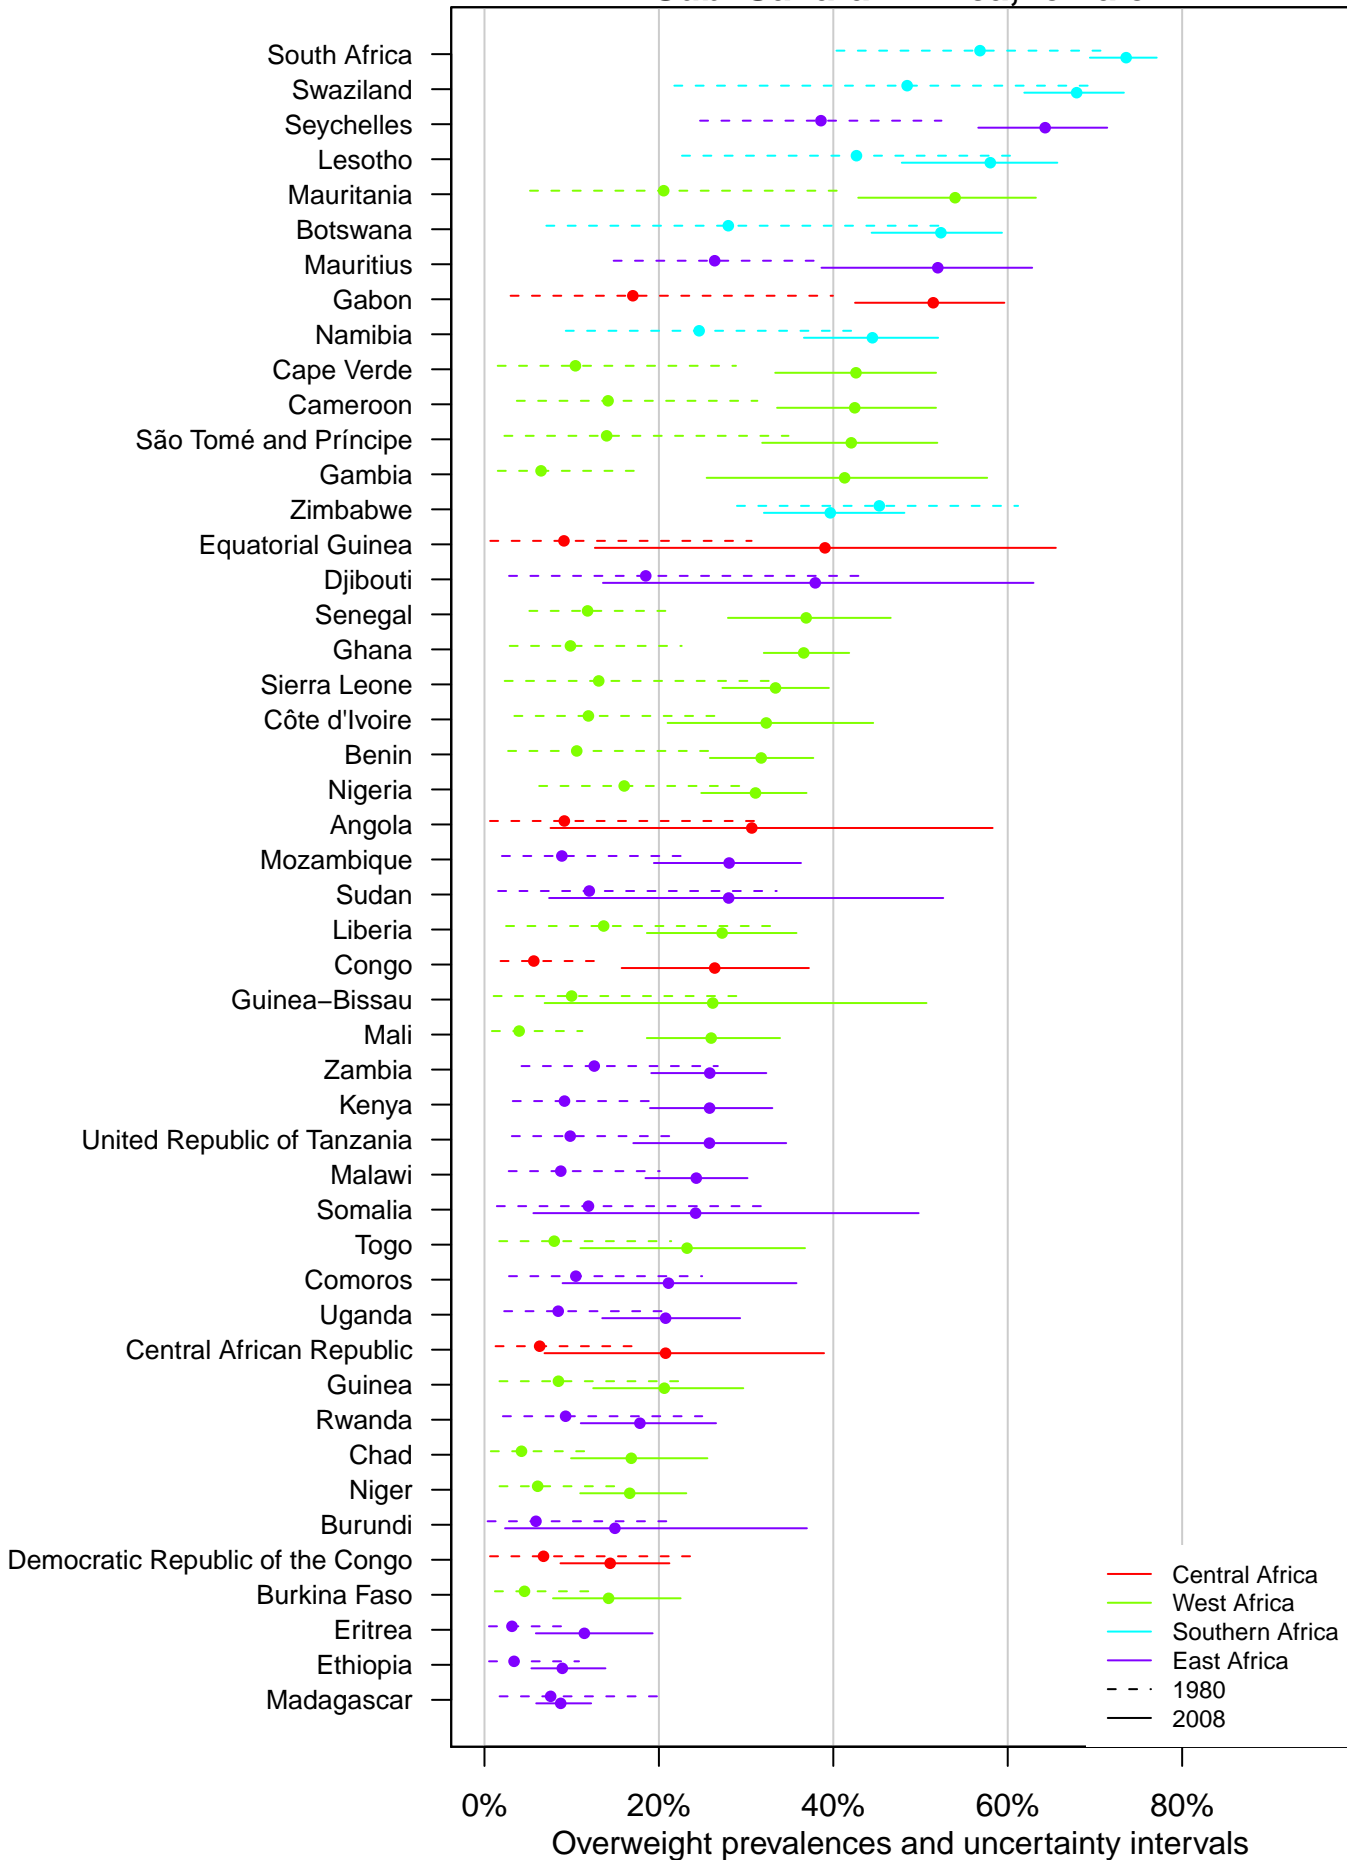

# Sub-Saharan Africa, male

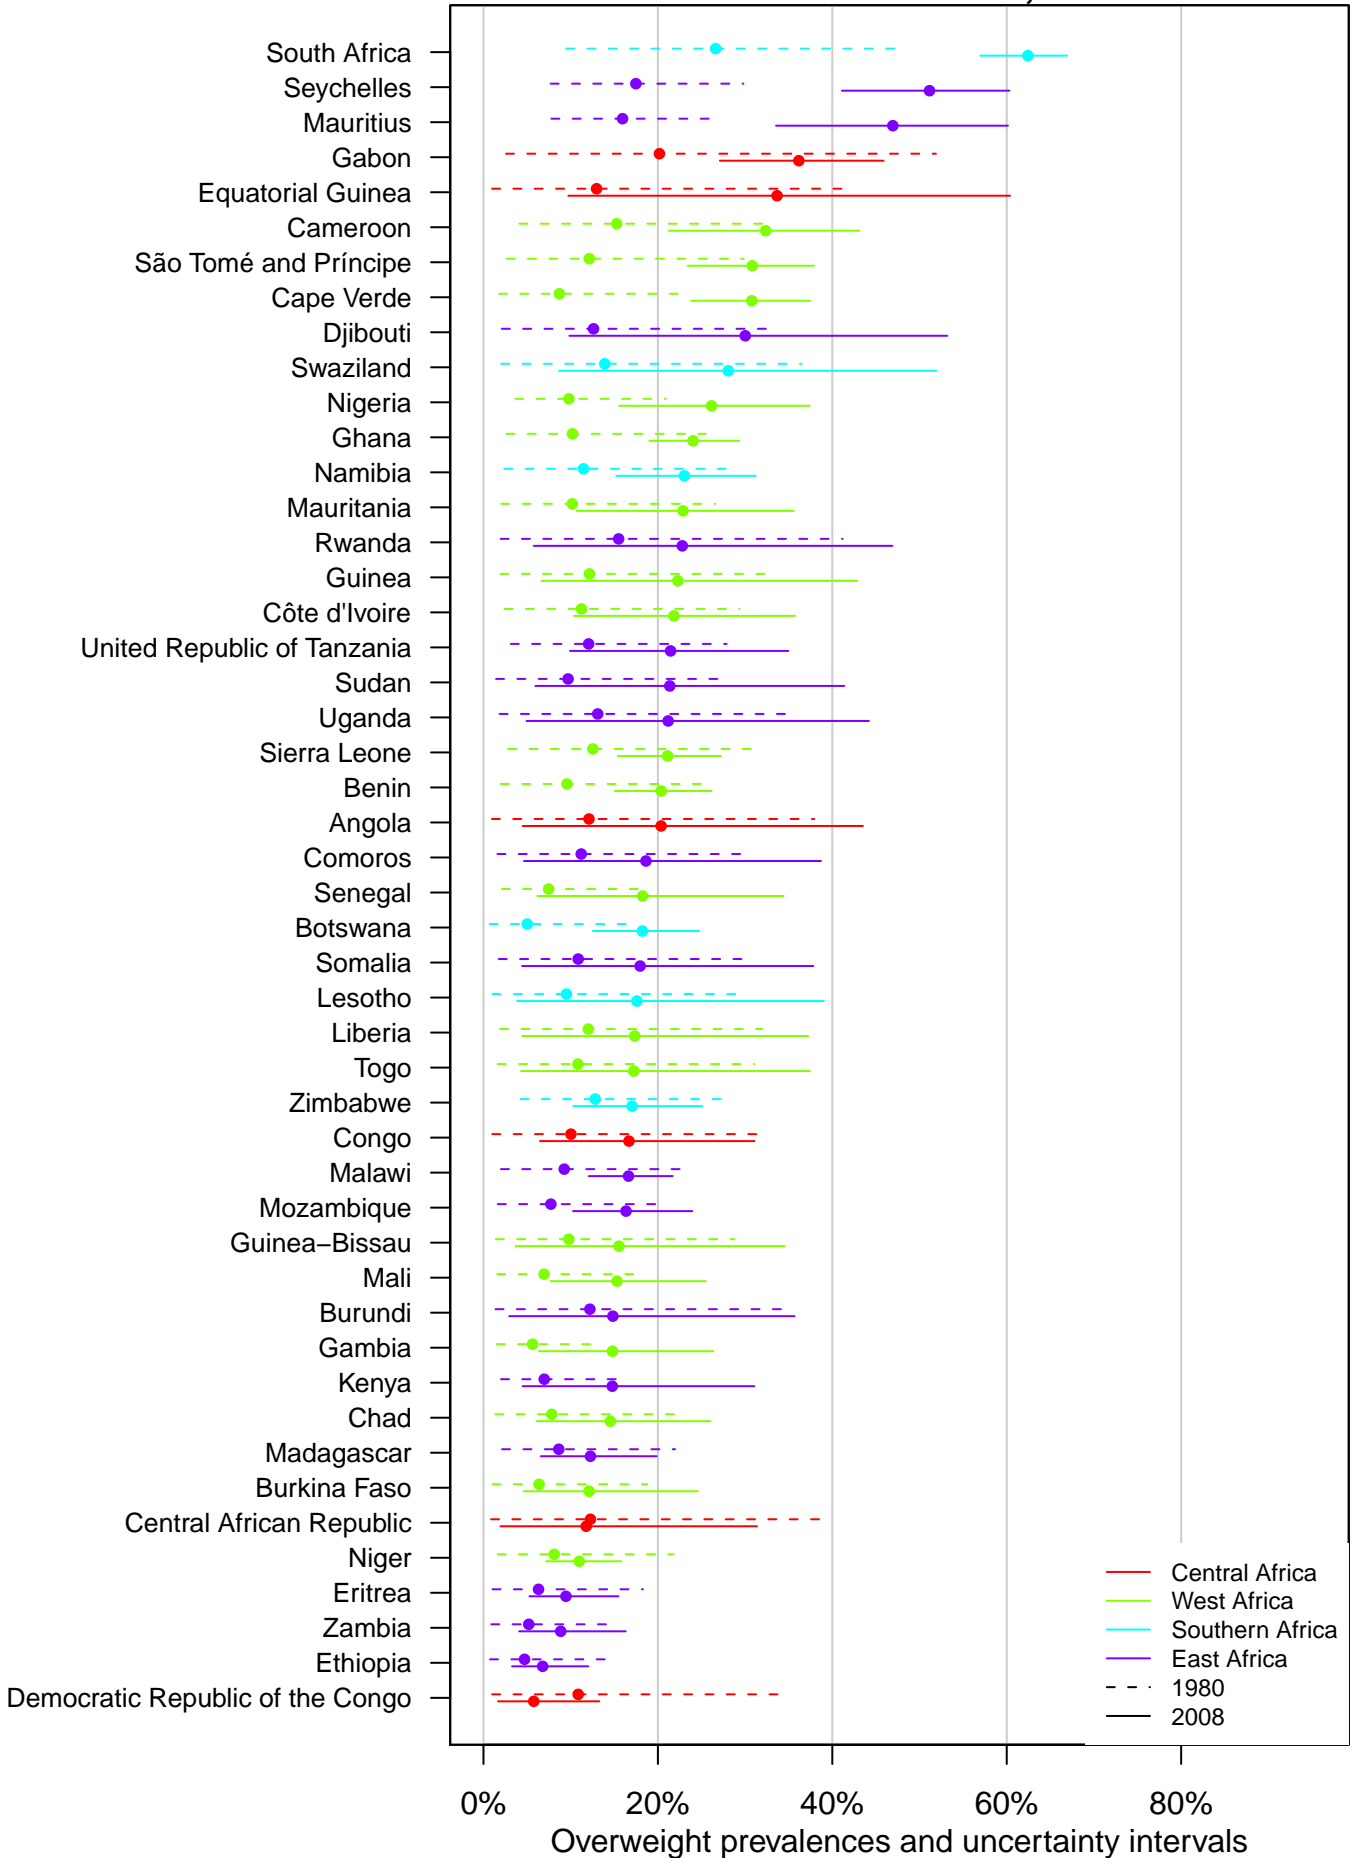

# North Africa and Middle East, female

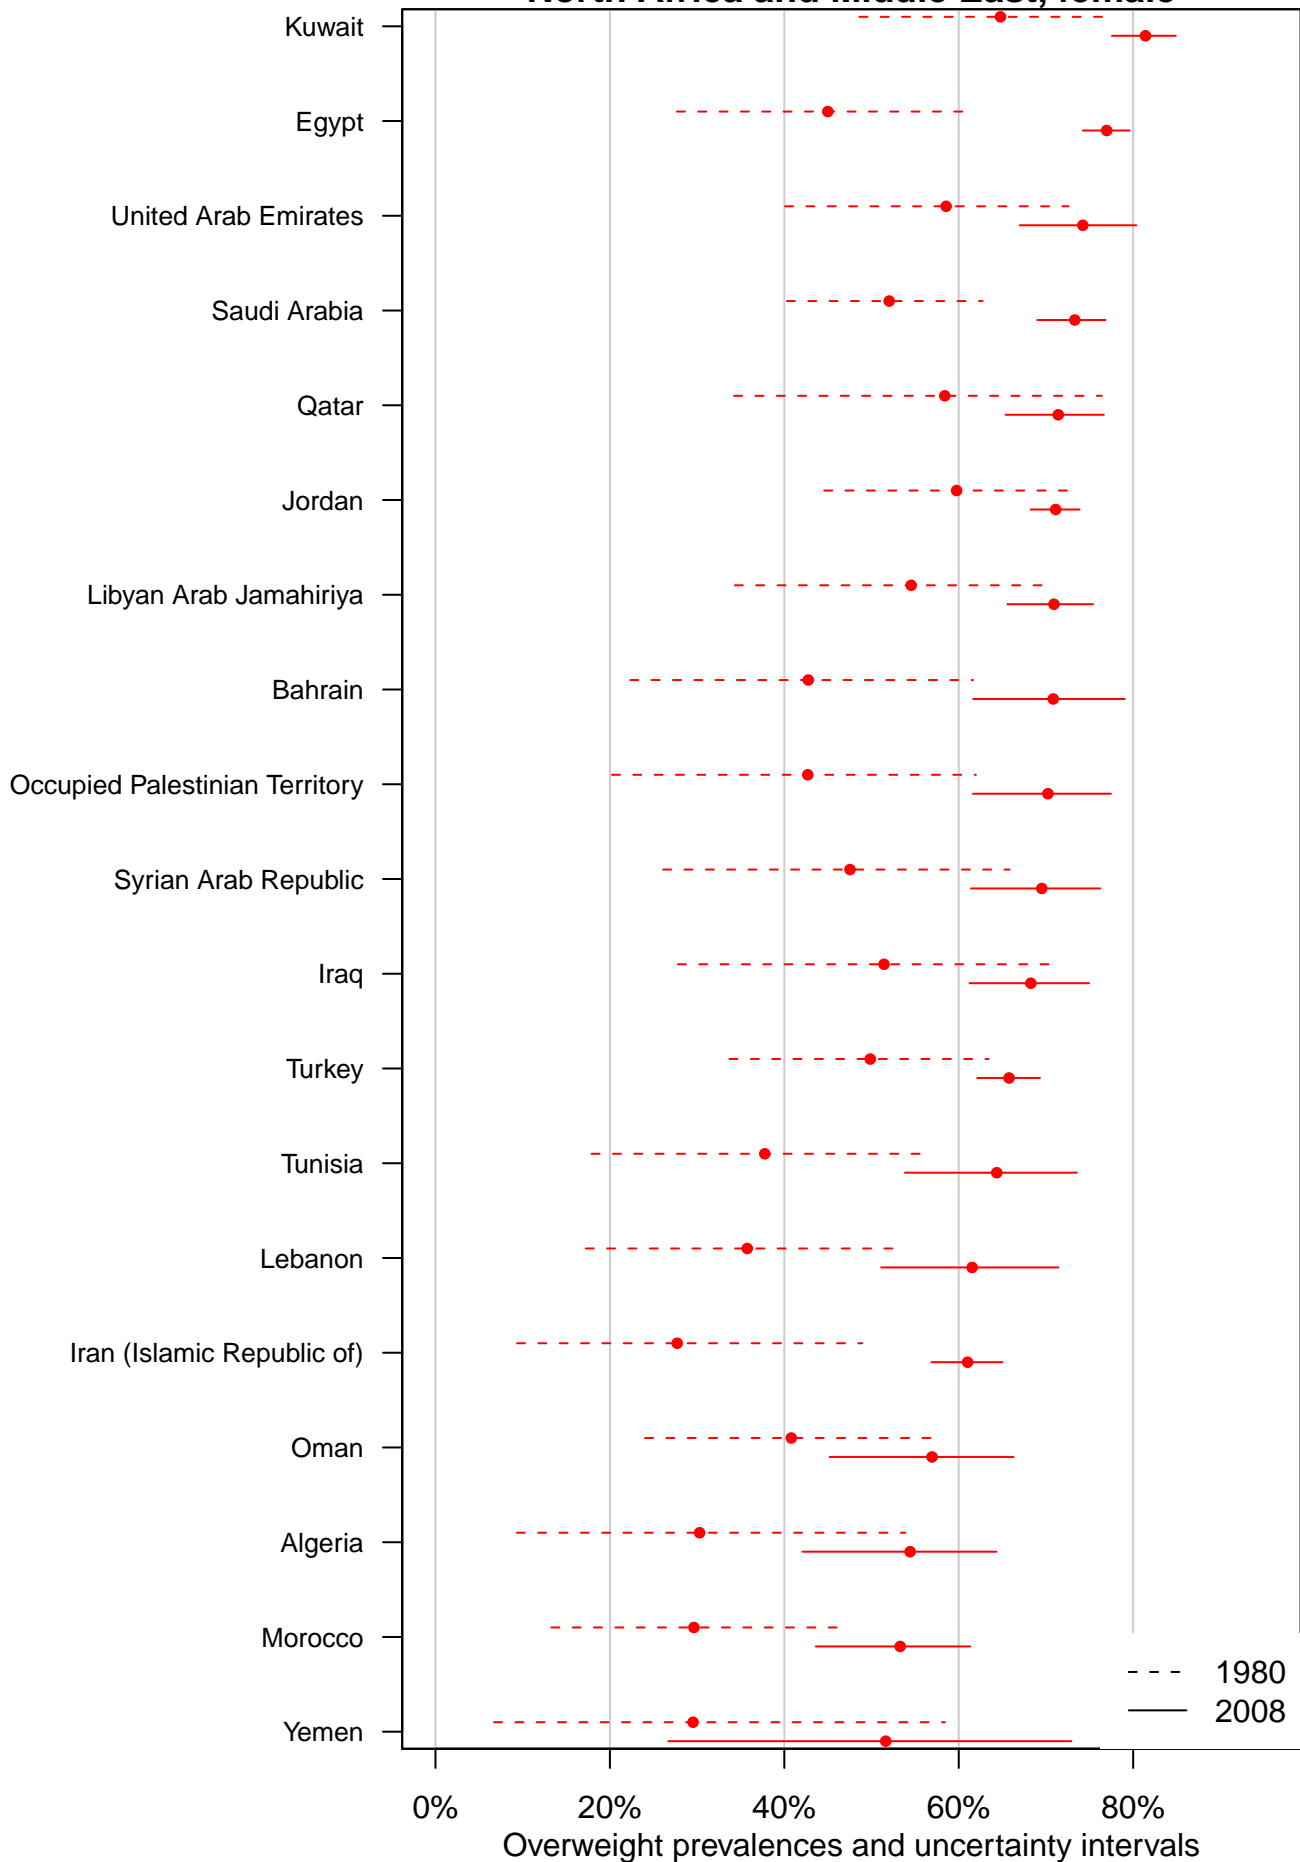

# North Africa and Middle East, male

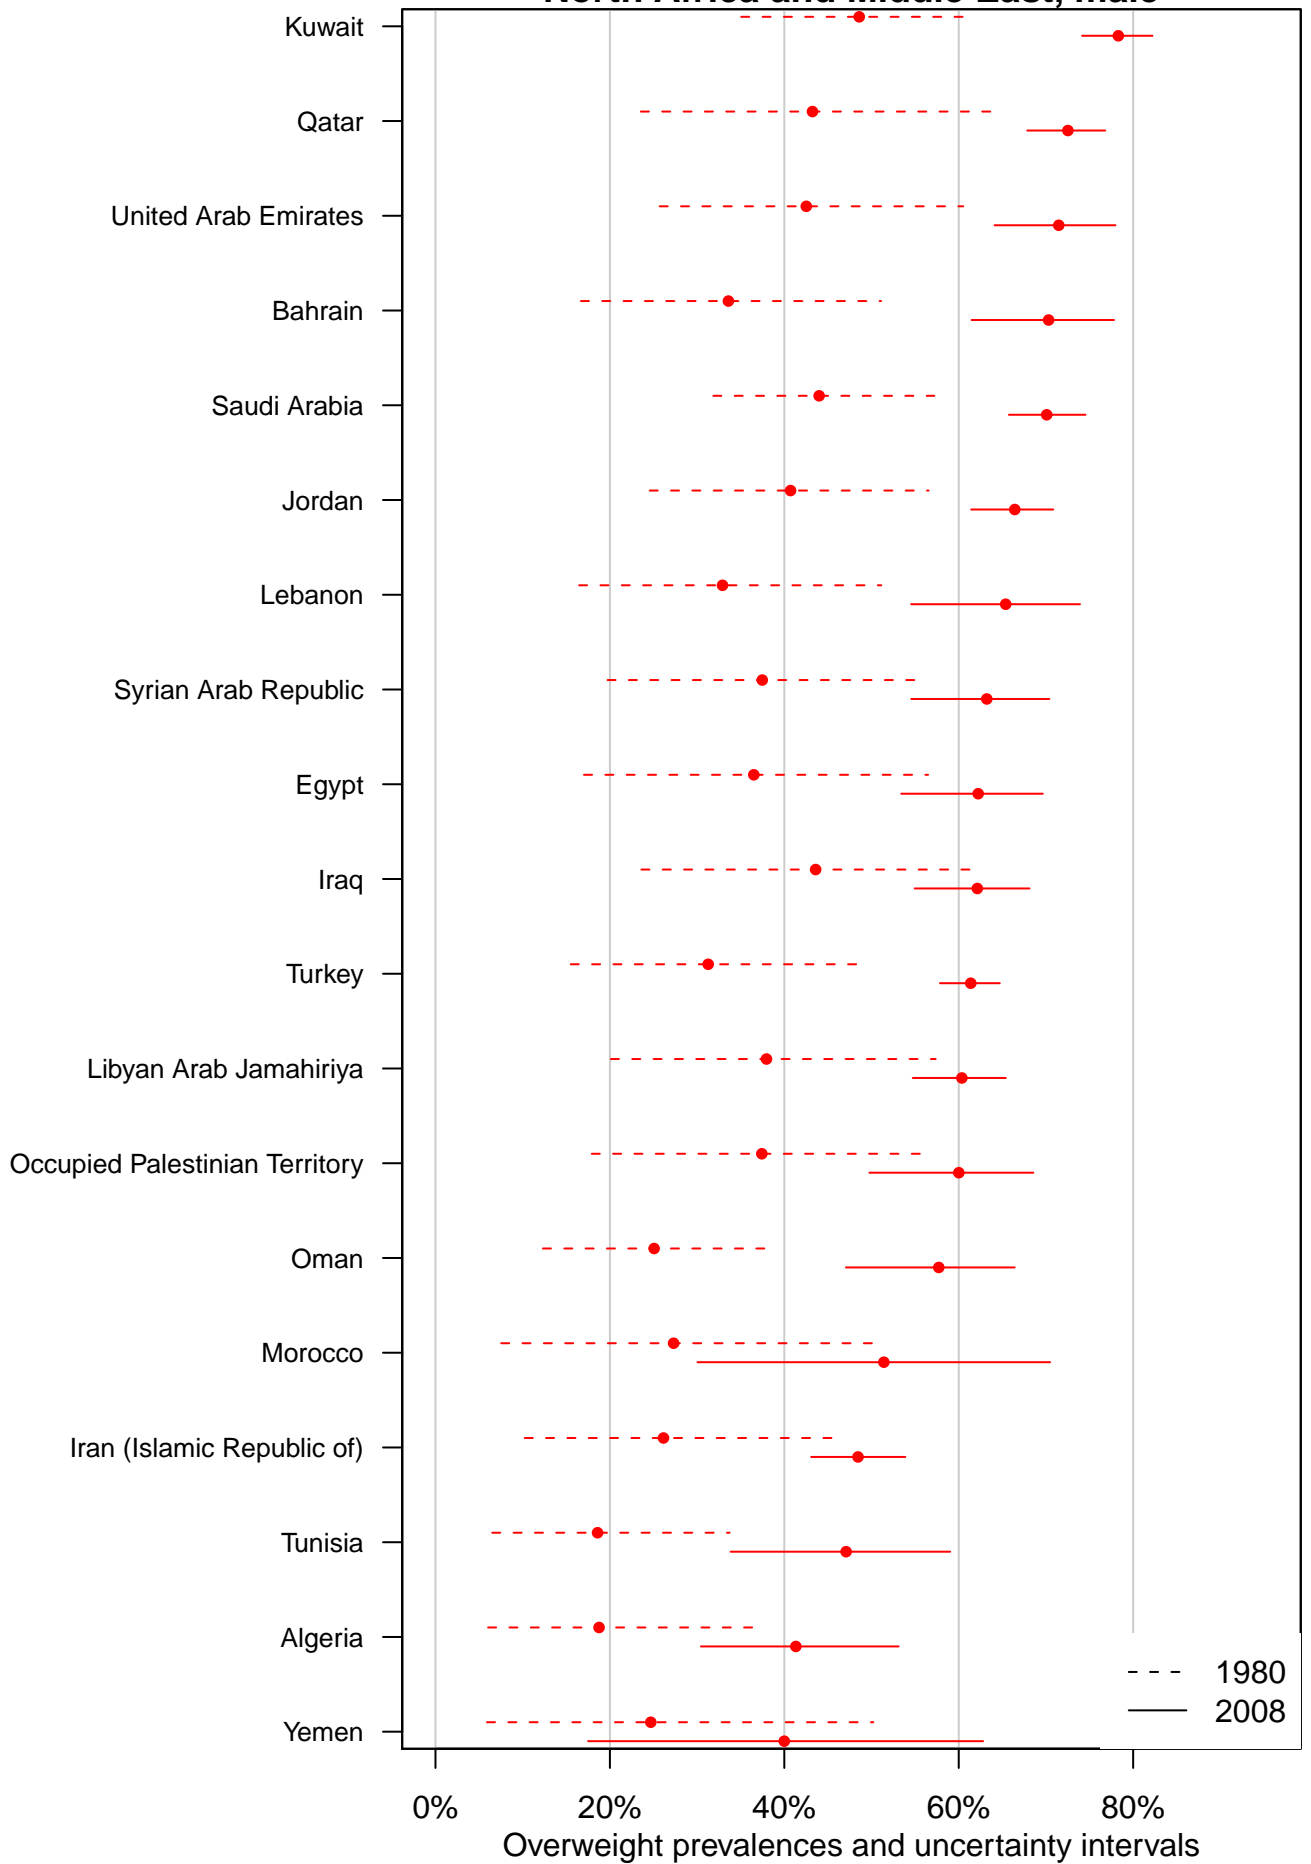

--- 1980  
 — 2008

Overweight prevalences and uncertainty intervals



# South and East Asia and Pacific, female

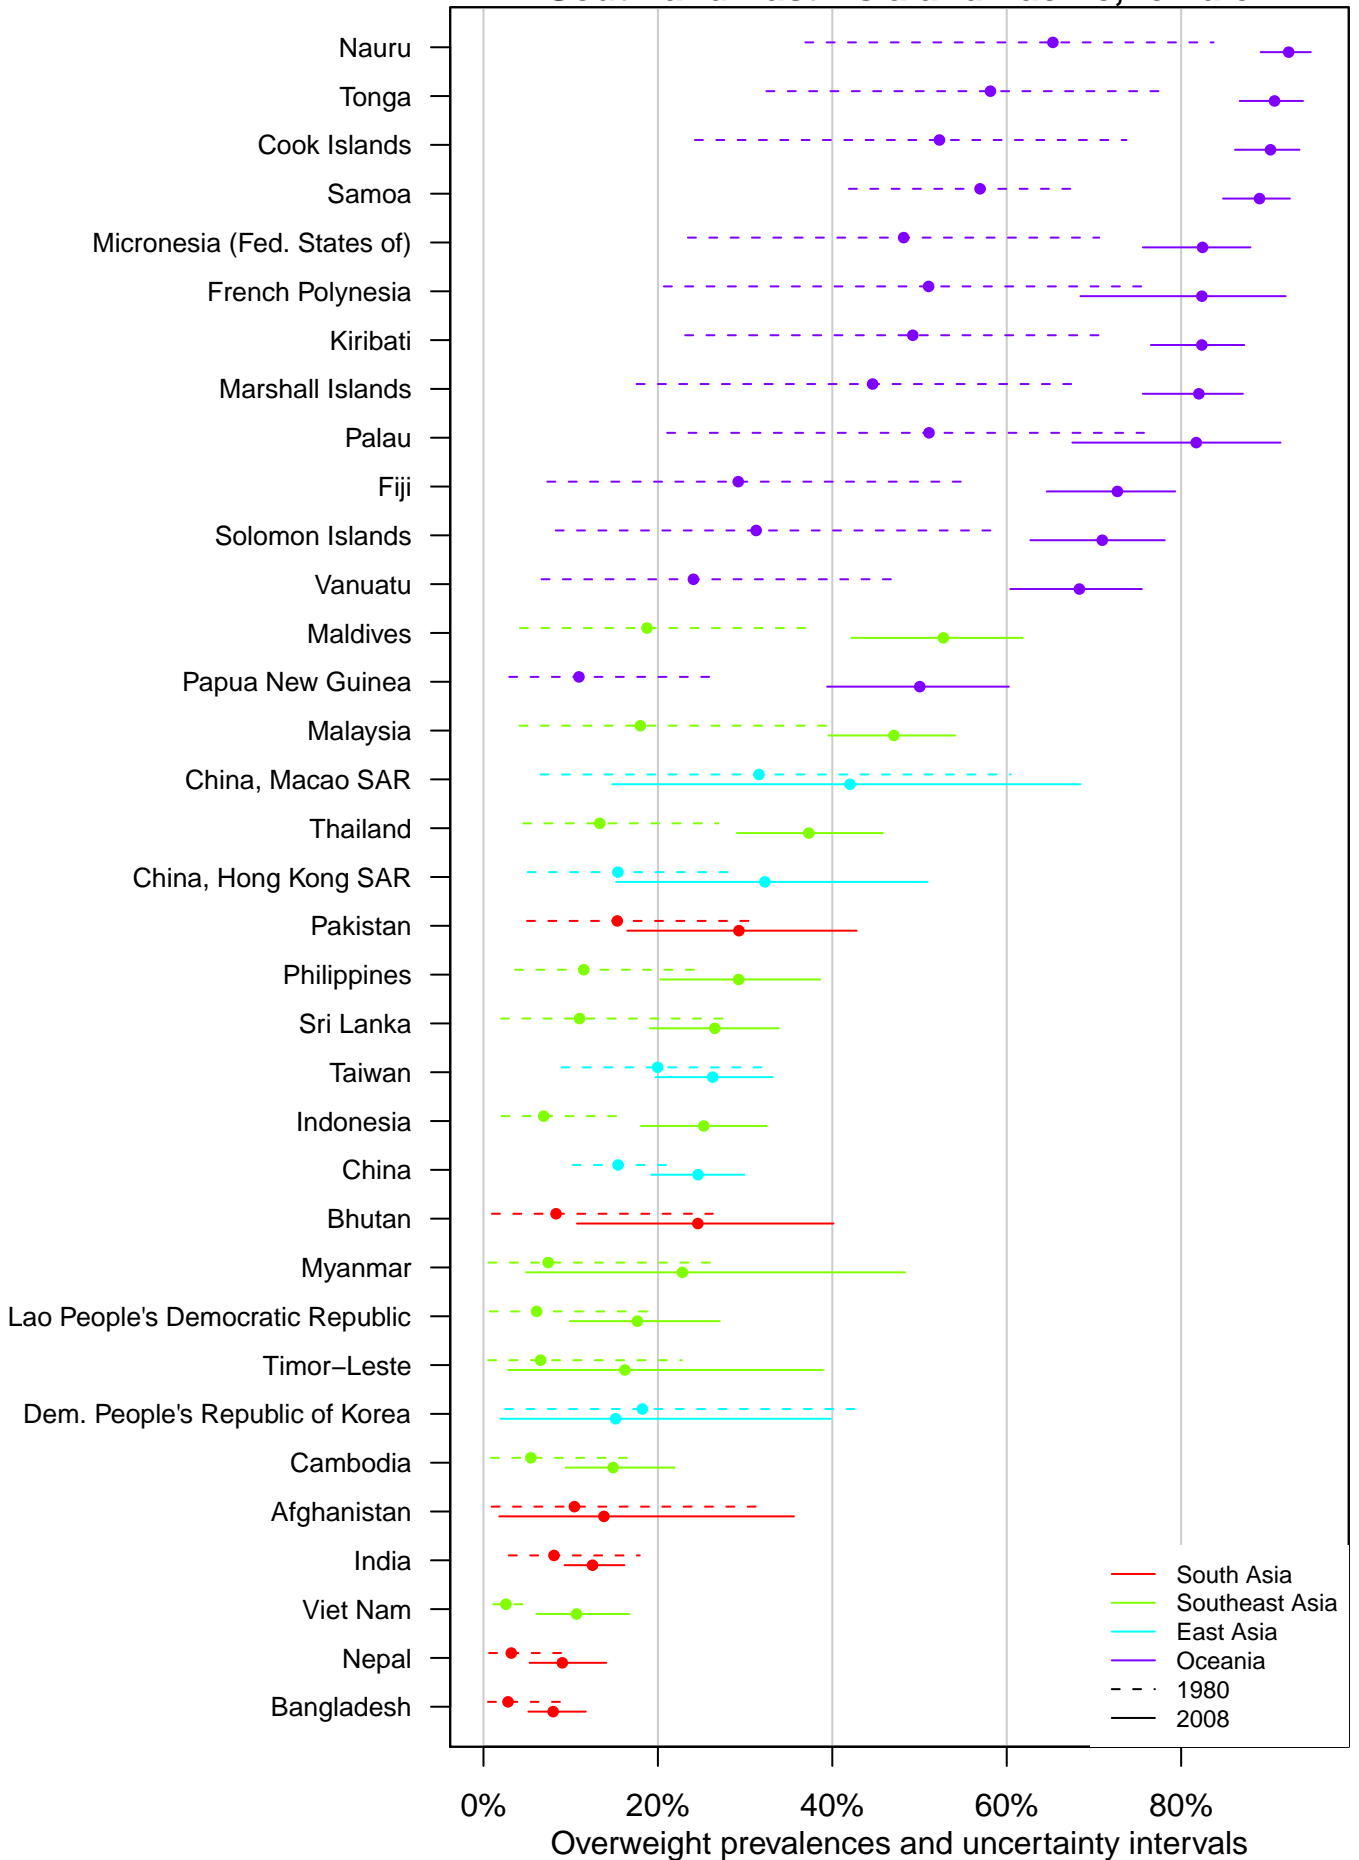

# South and East Asia and Pacific, male

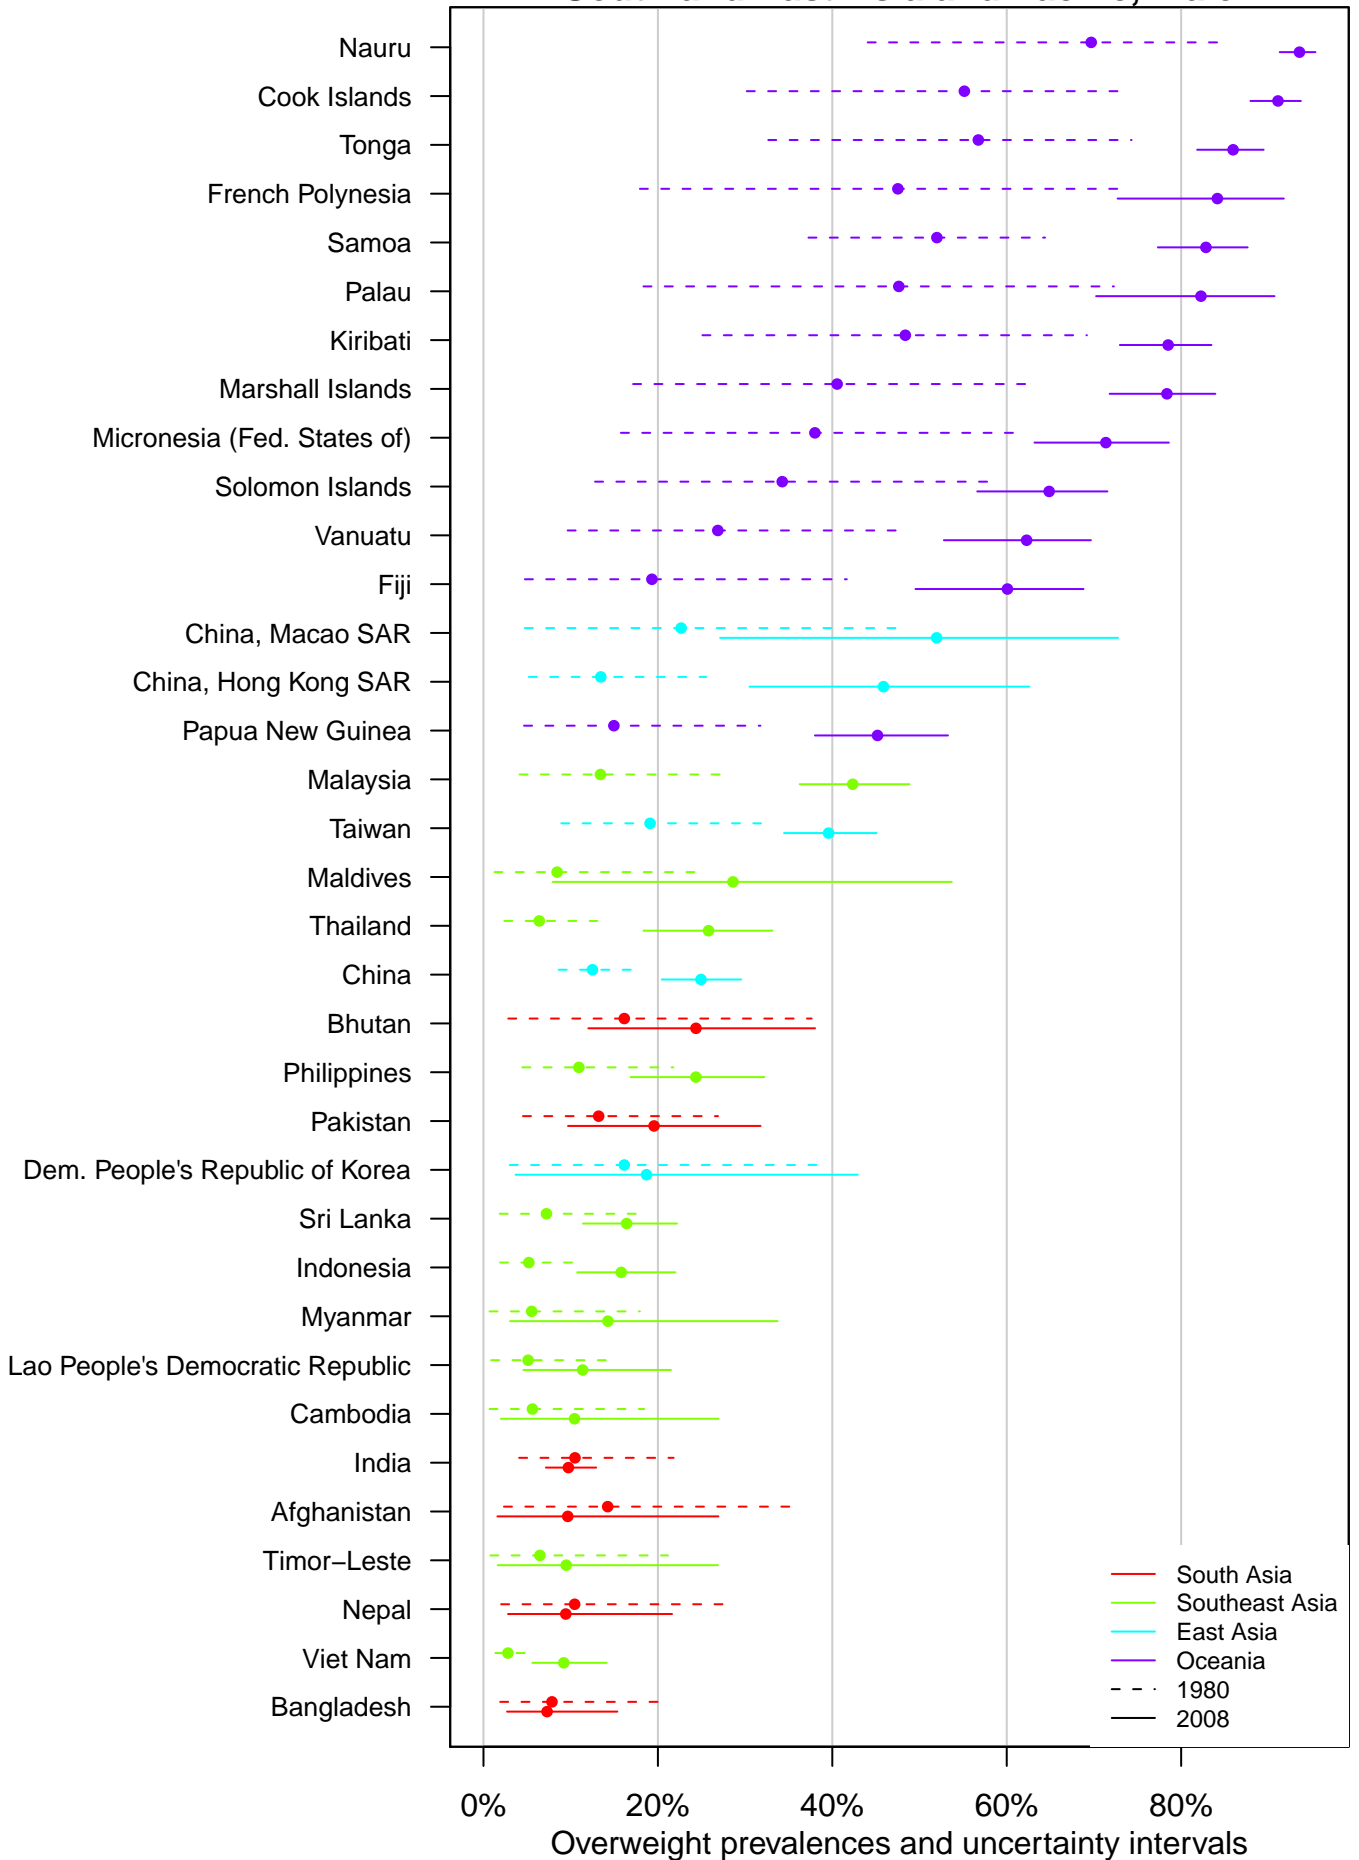

# Latin America and Caribbean, female

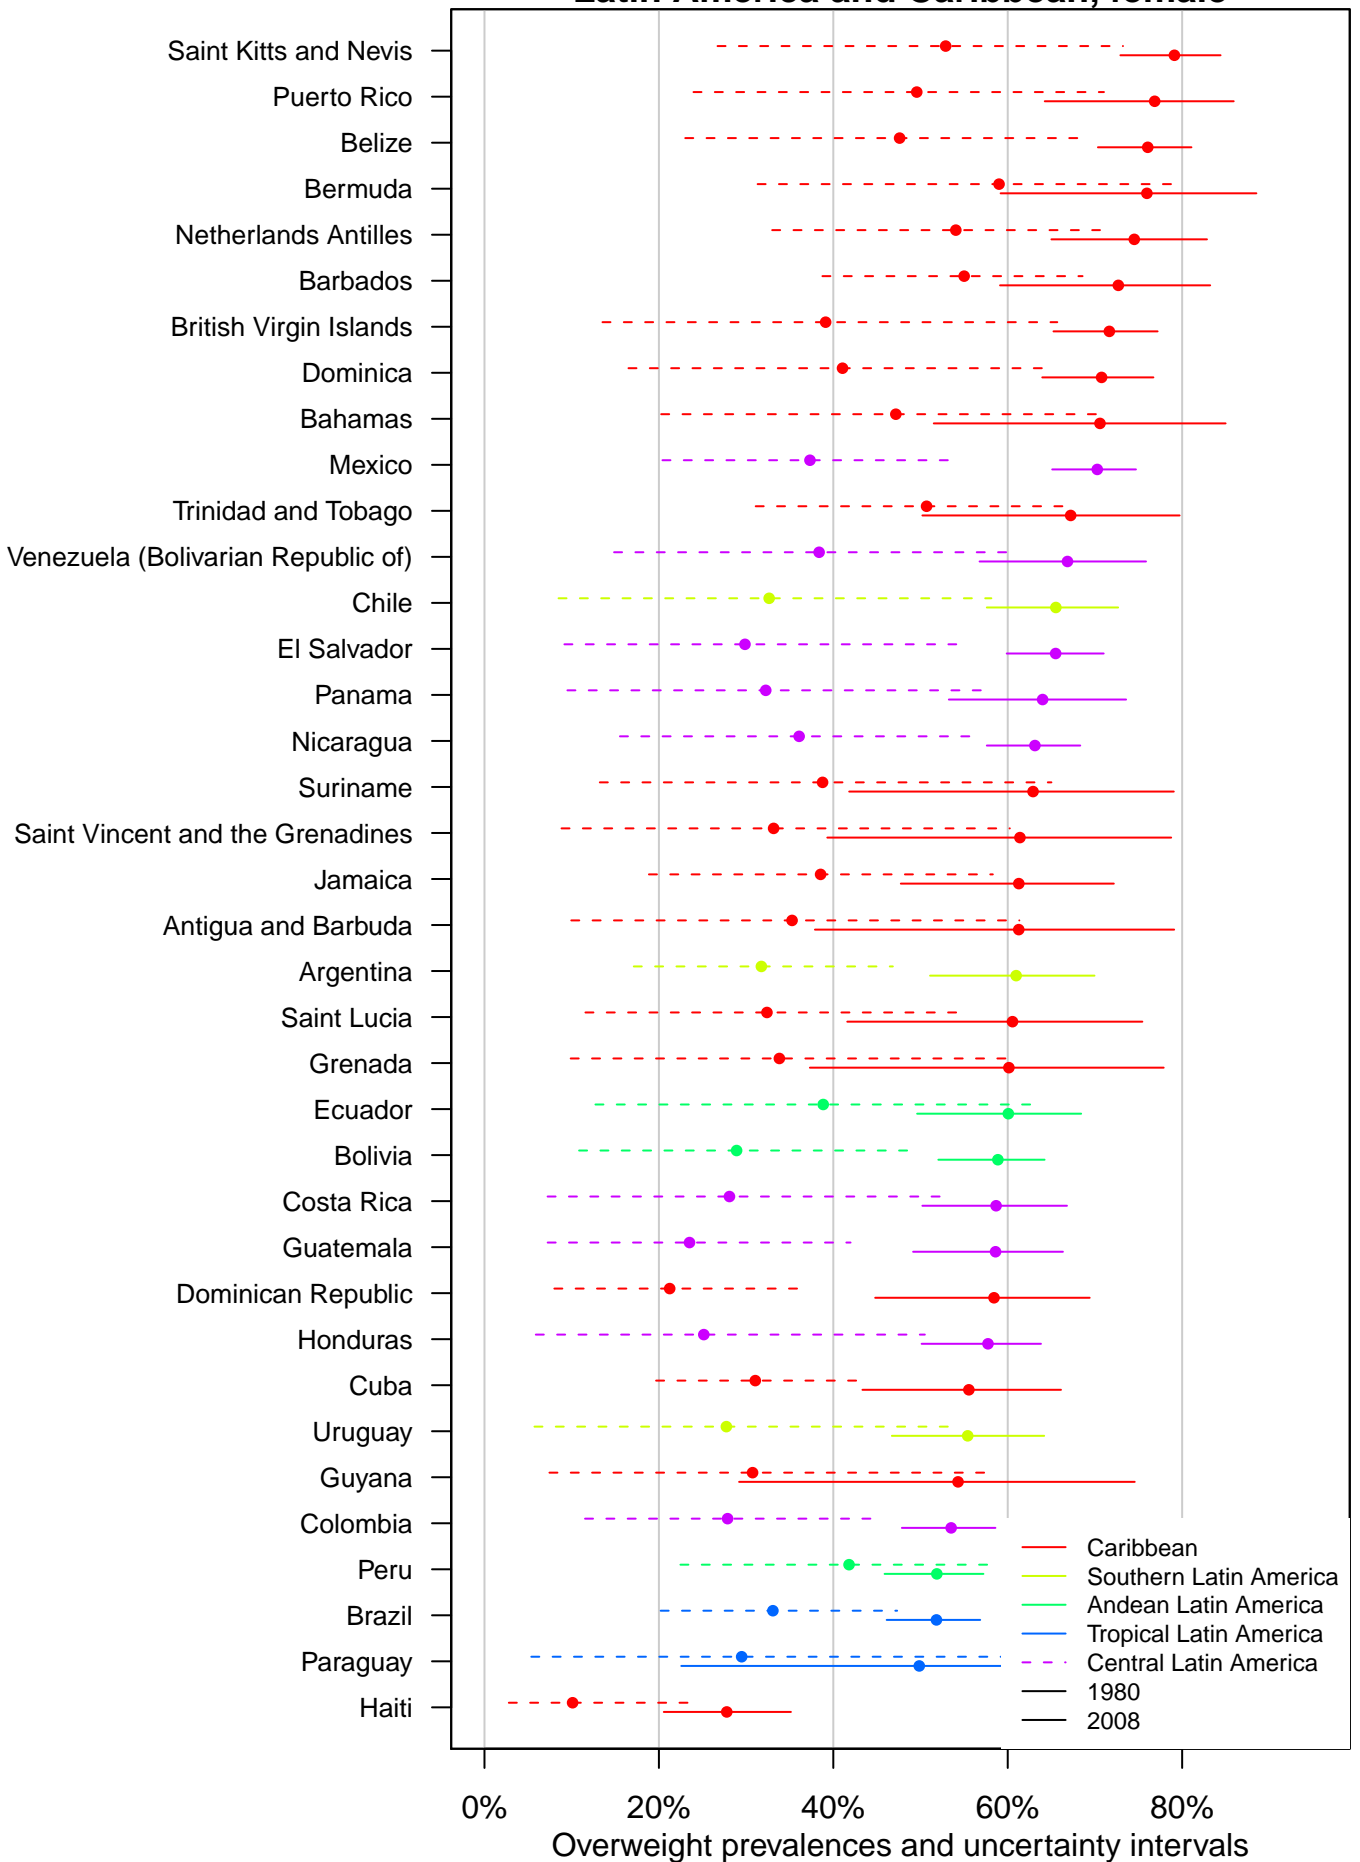

# Latin America and Caribbean, male

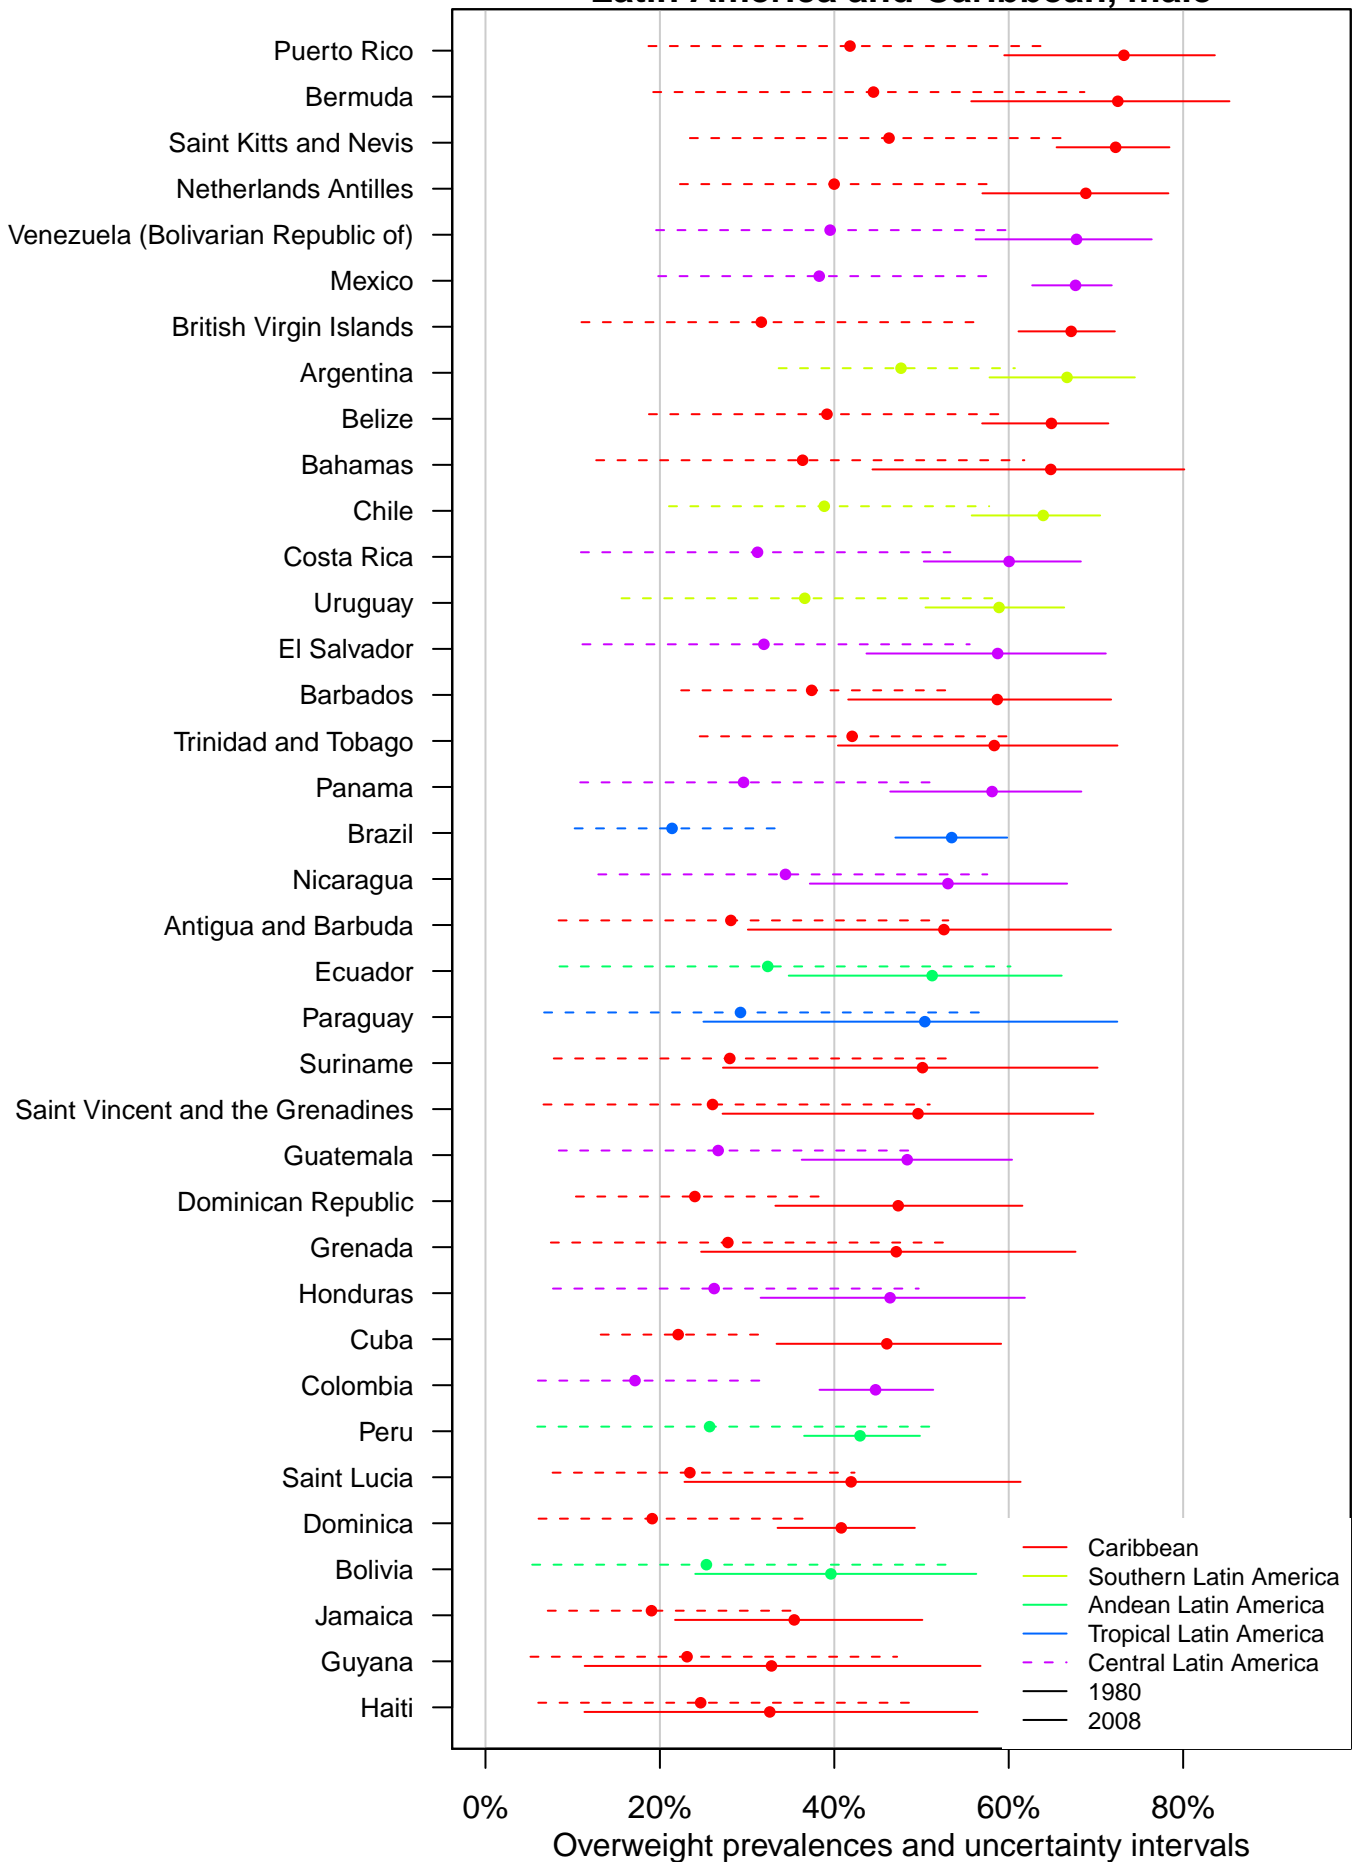

# High-income, female

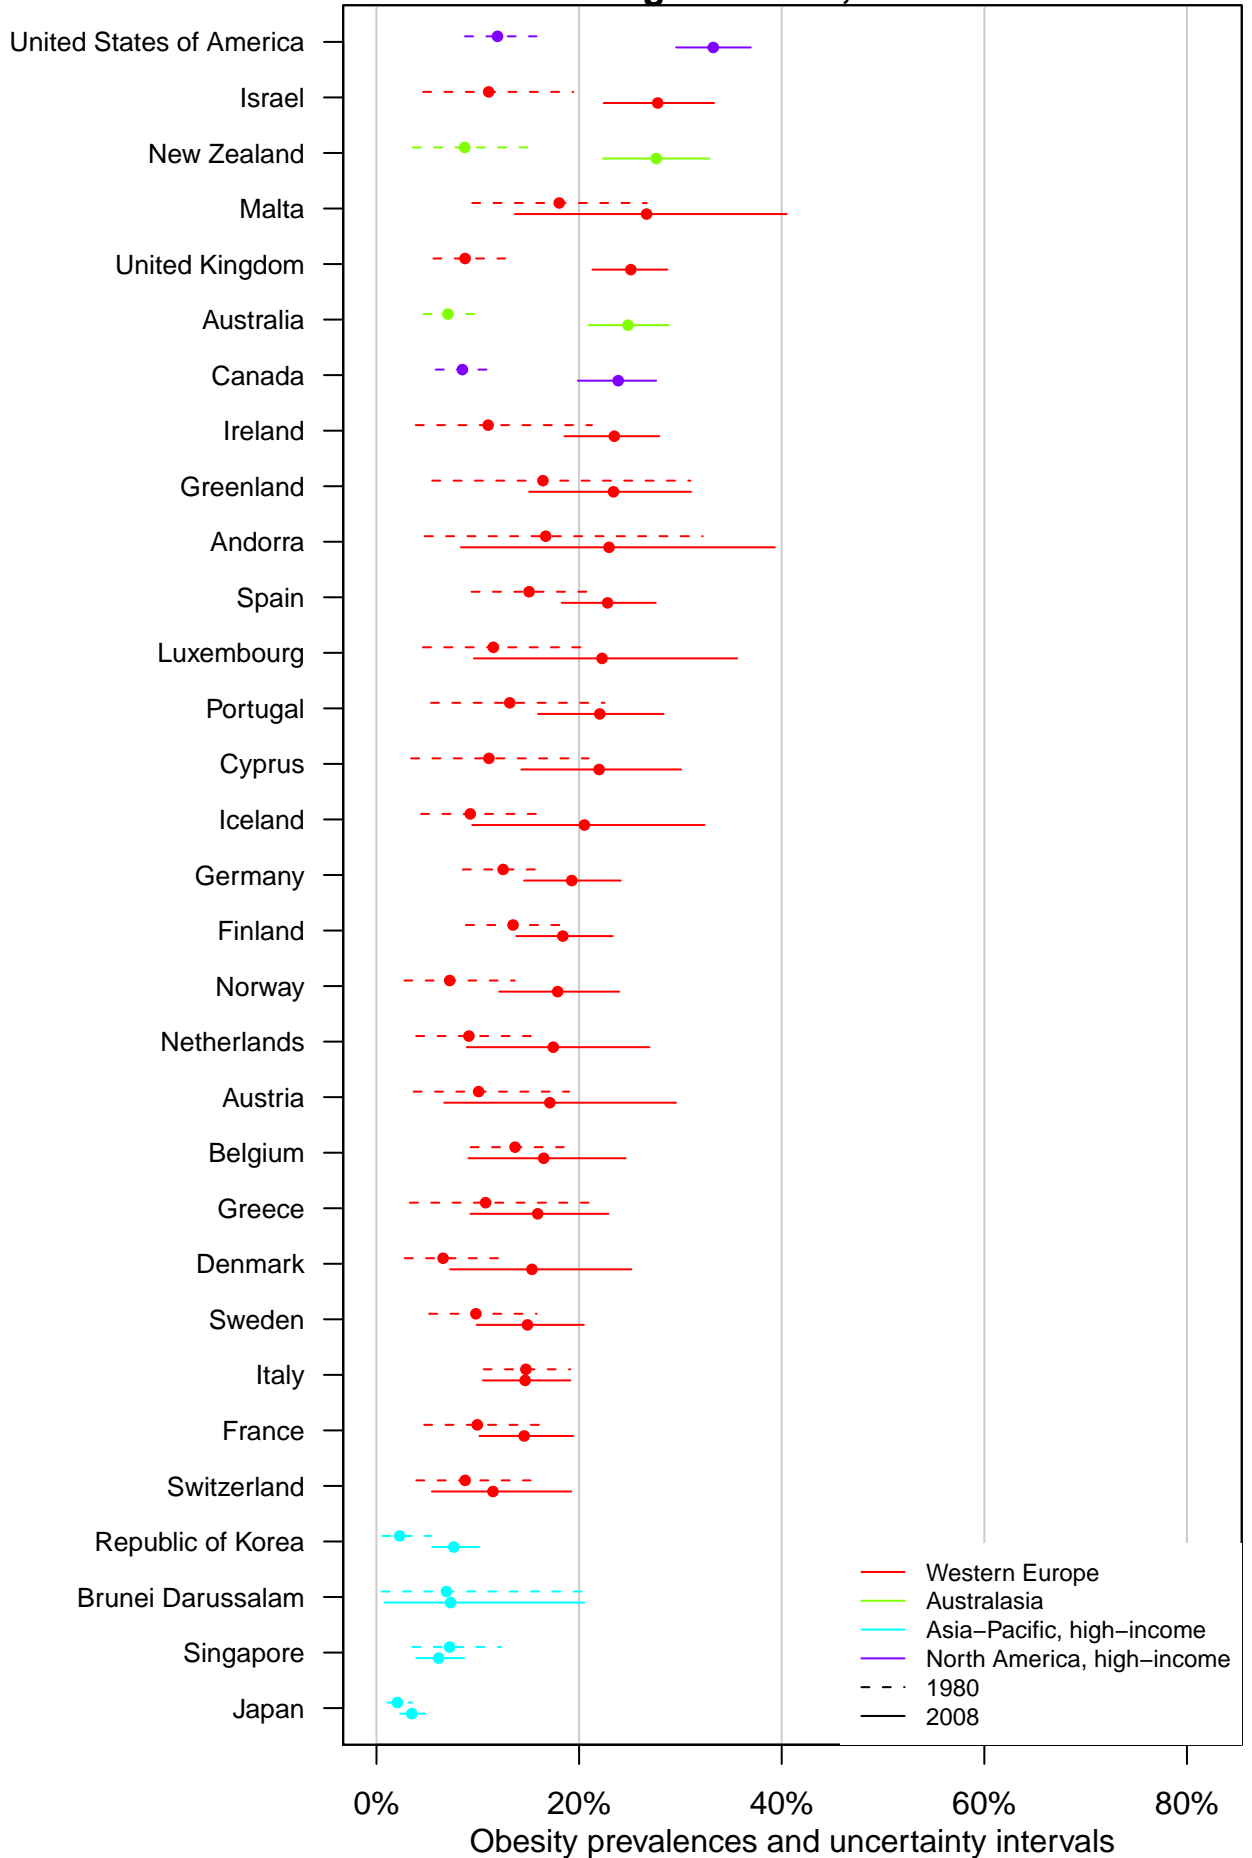

# High-income, male

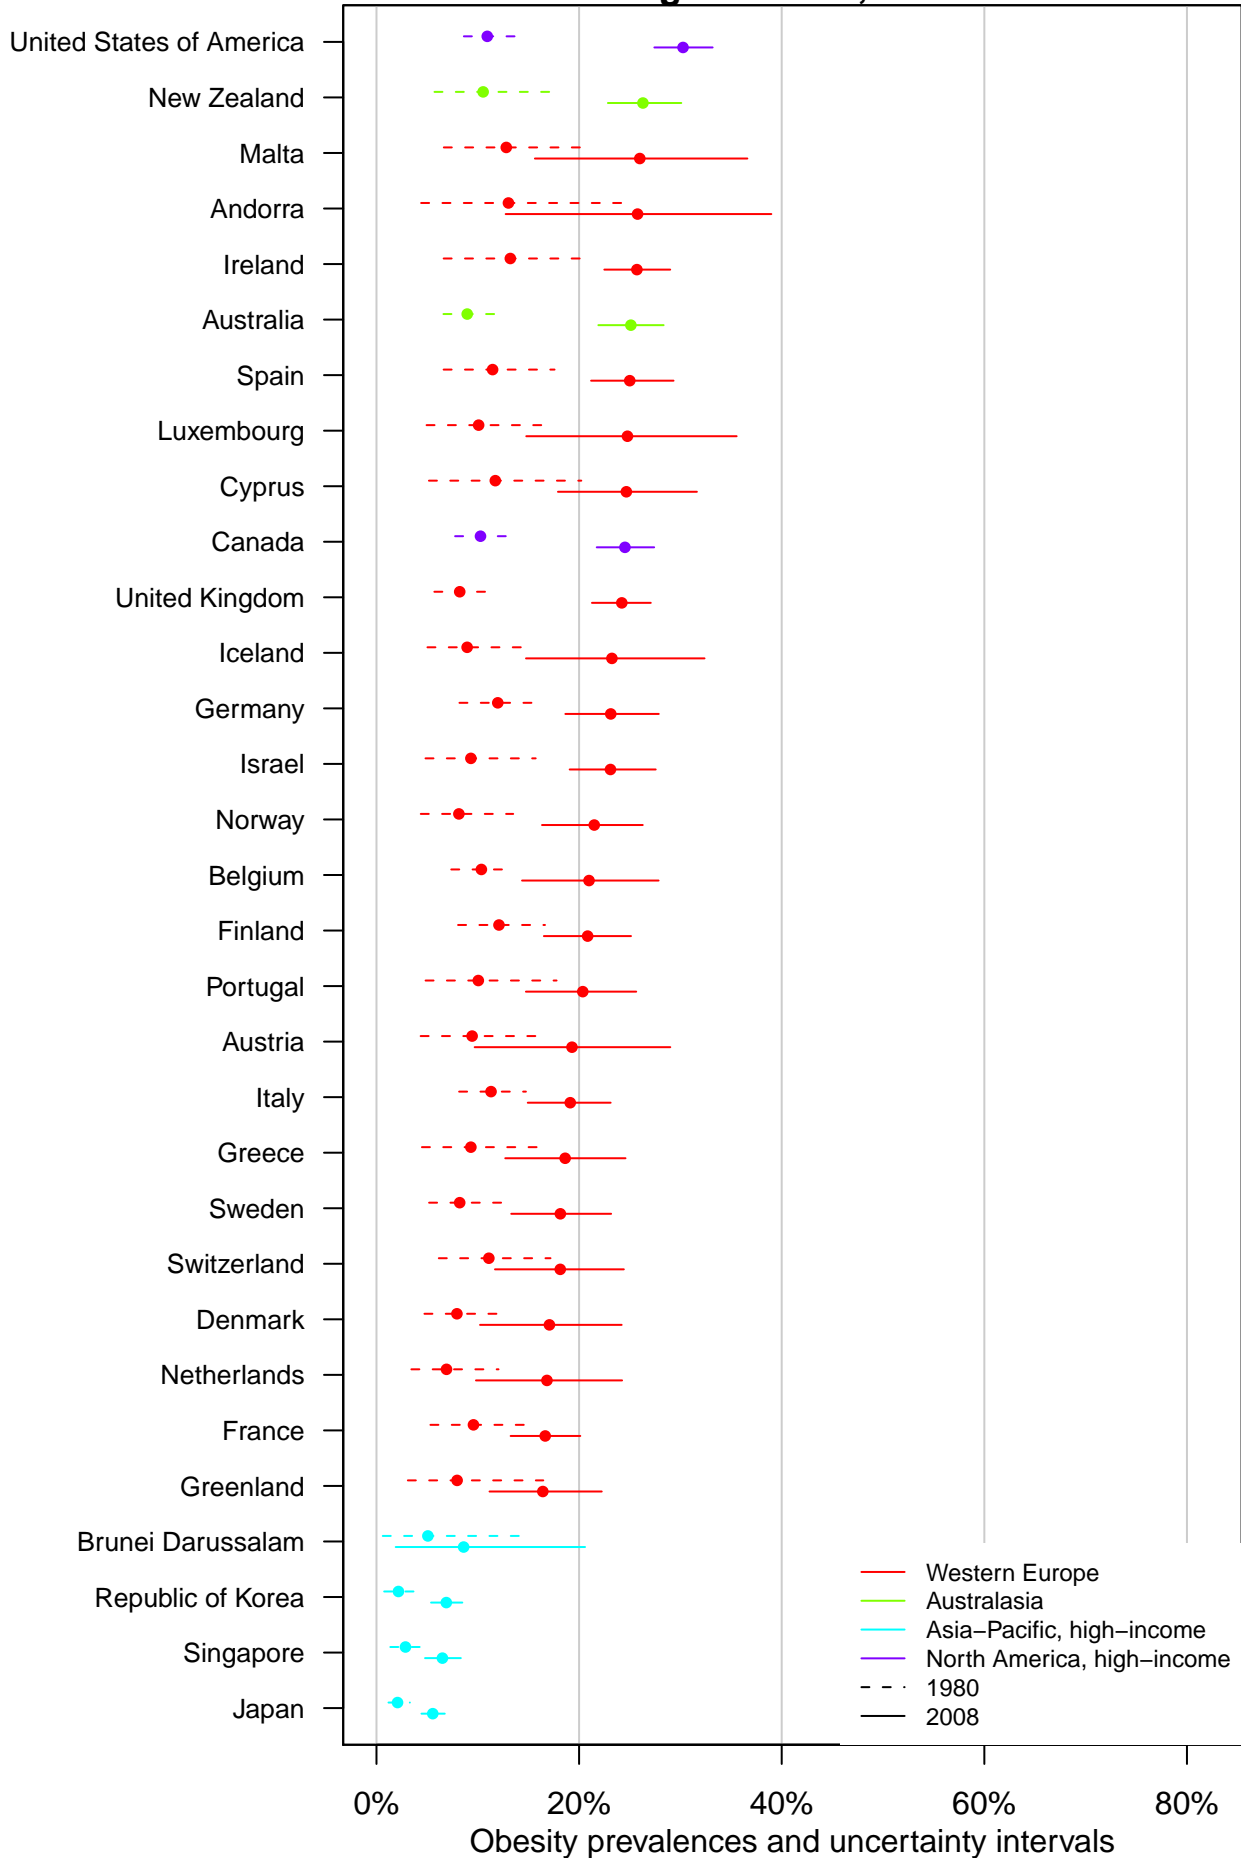

# Central and Eastern Europe and Central Asia, female

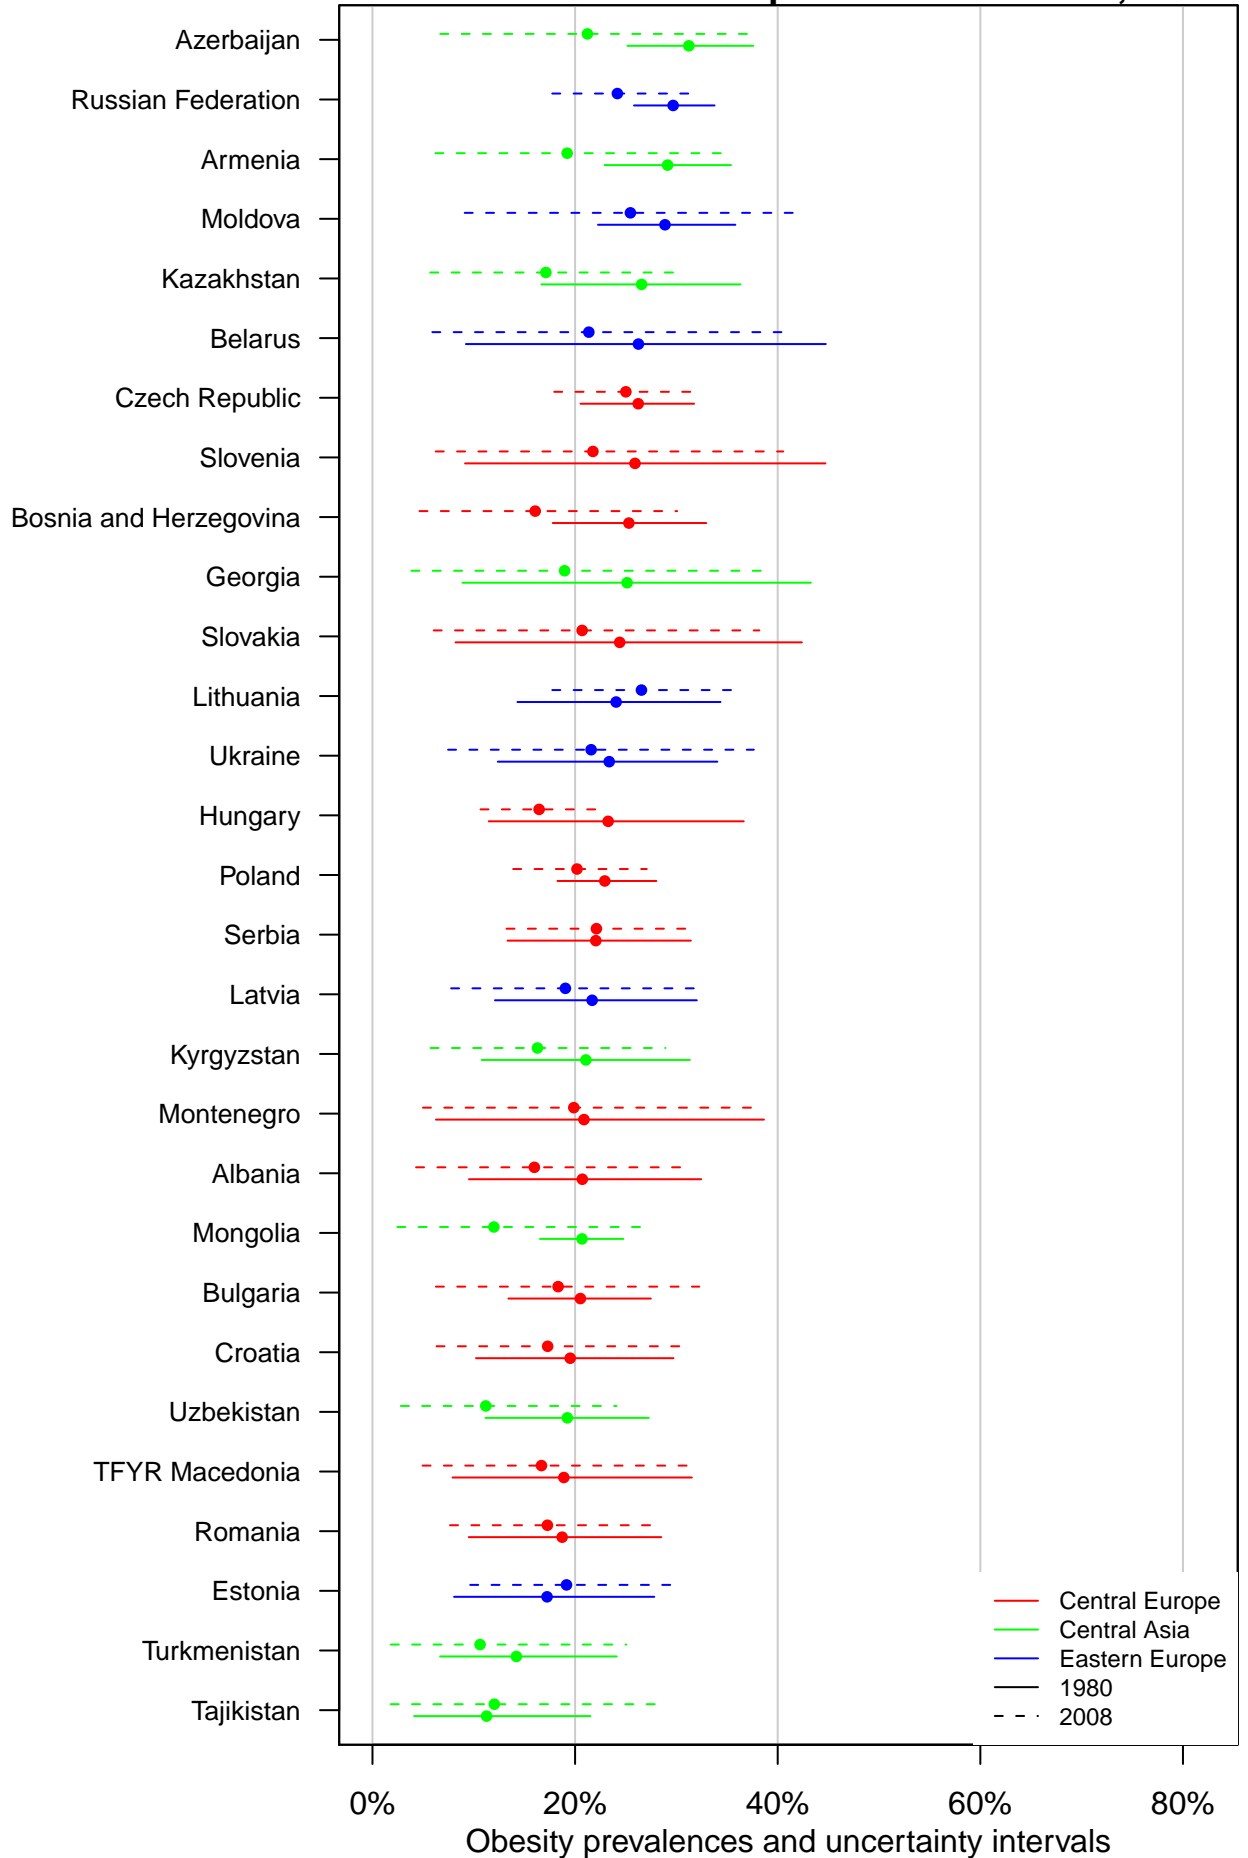

# Central and Eastern Europe and Central Asia, male

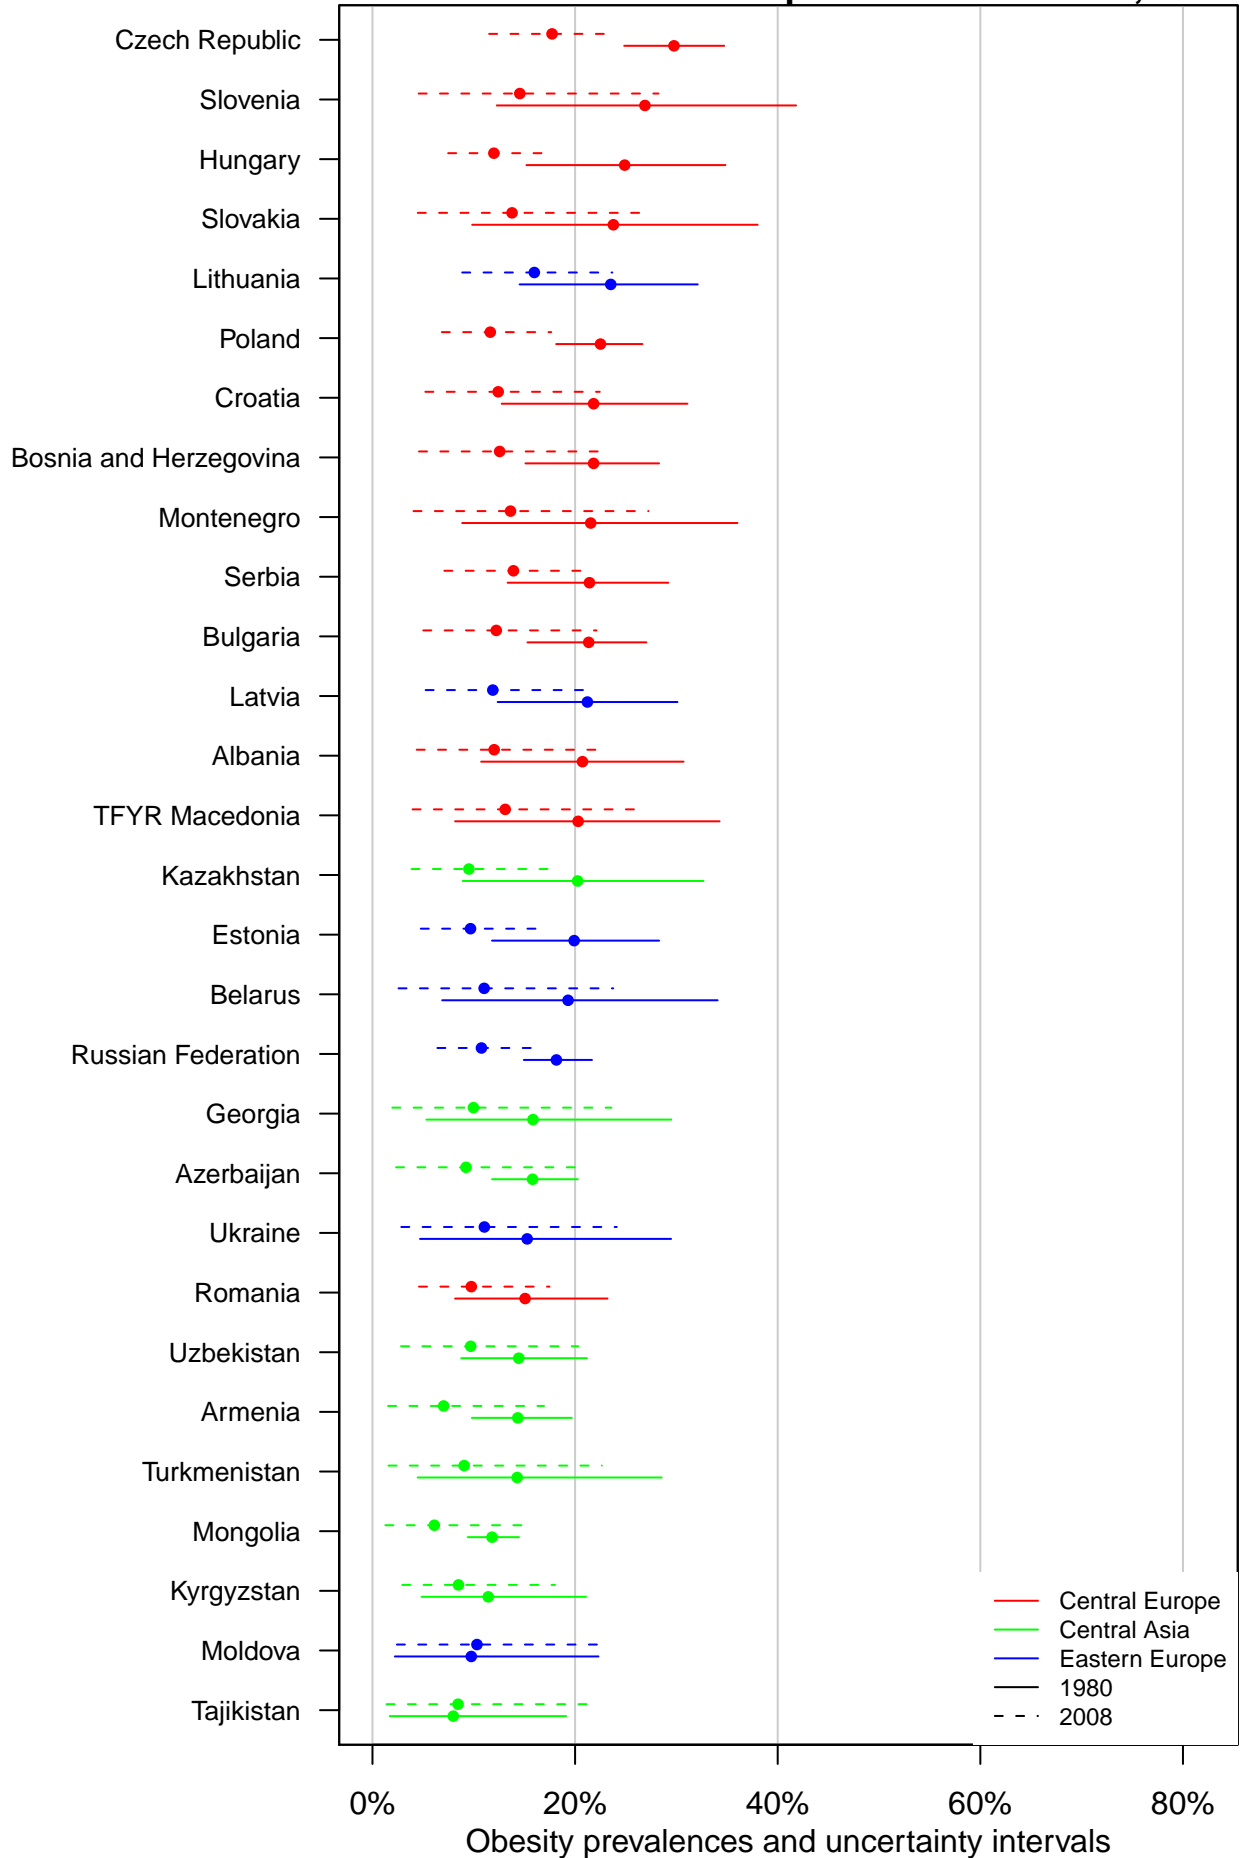



# Sub-Saharan Africa, female

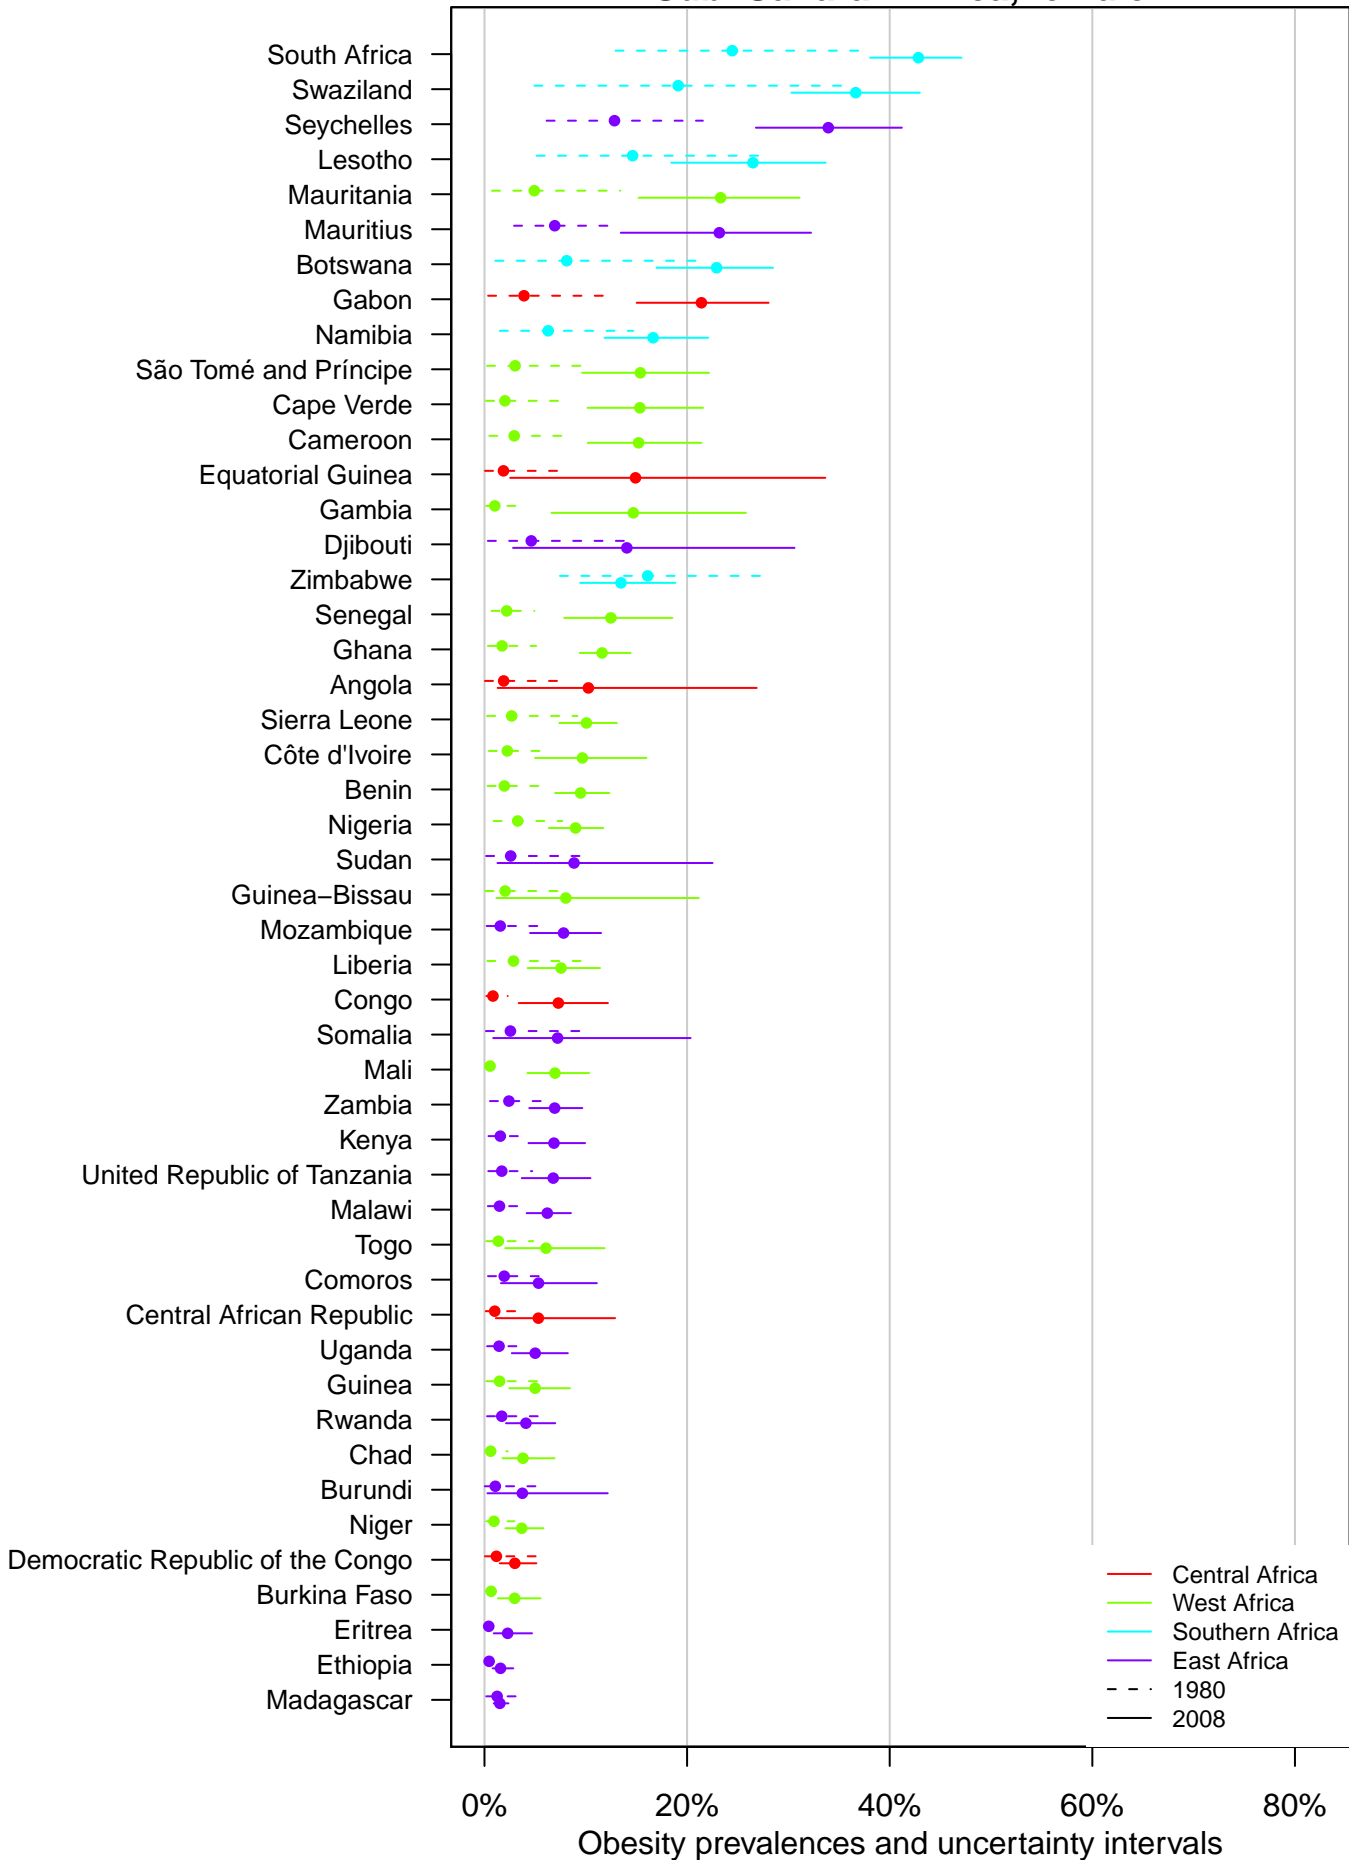

# Sub-Saharan Africa, male

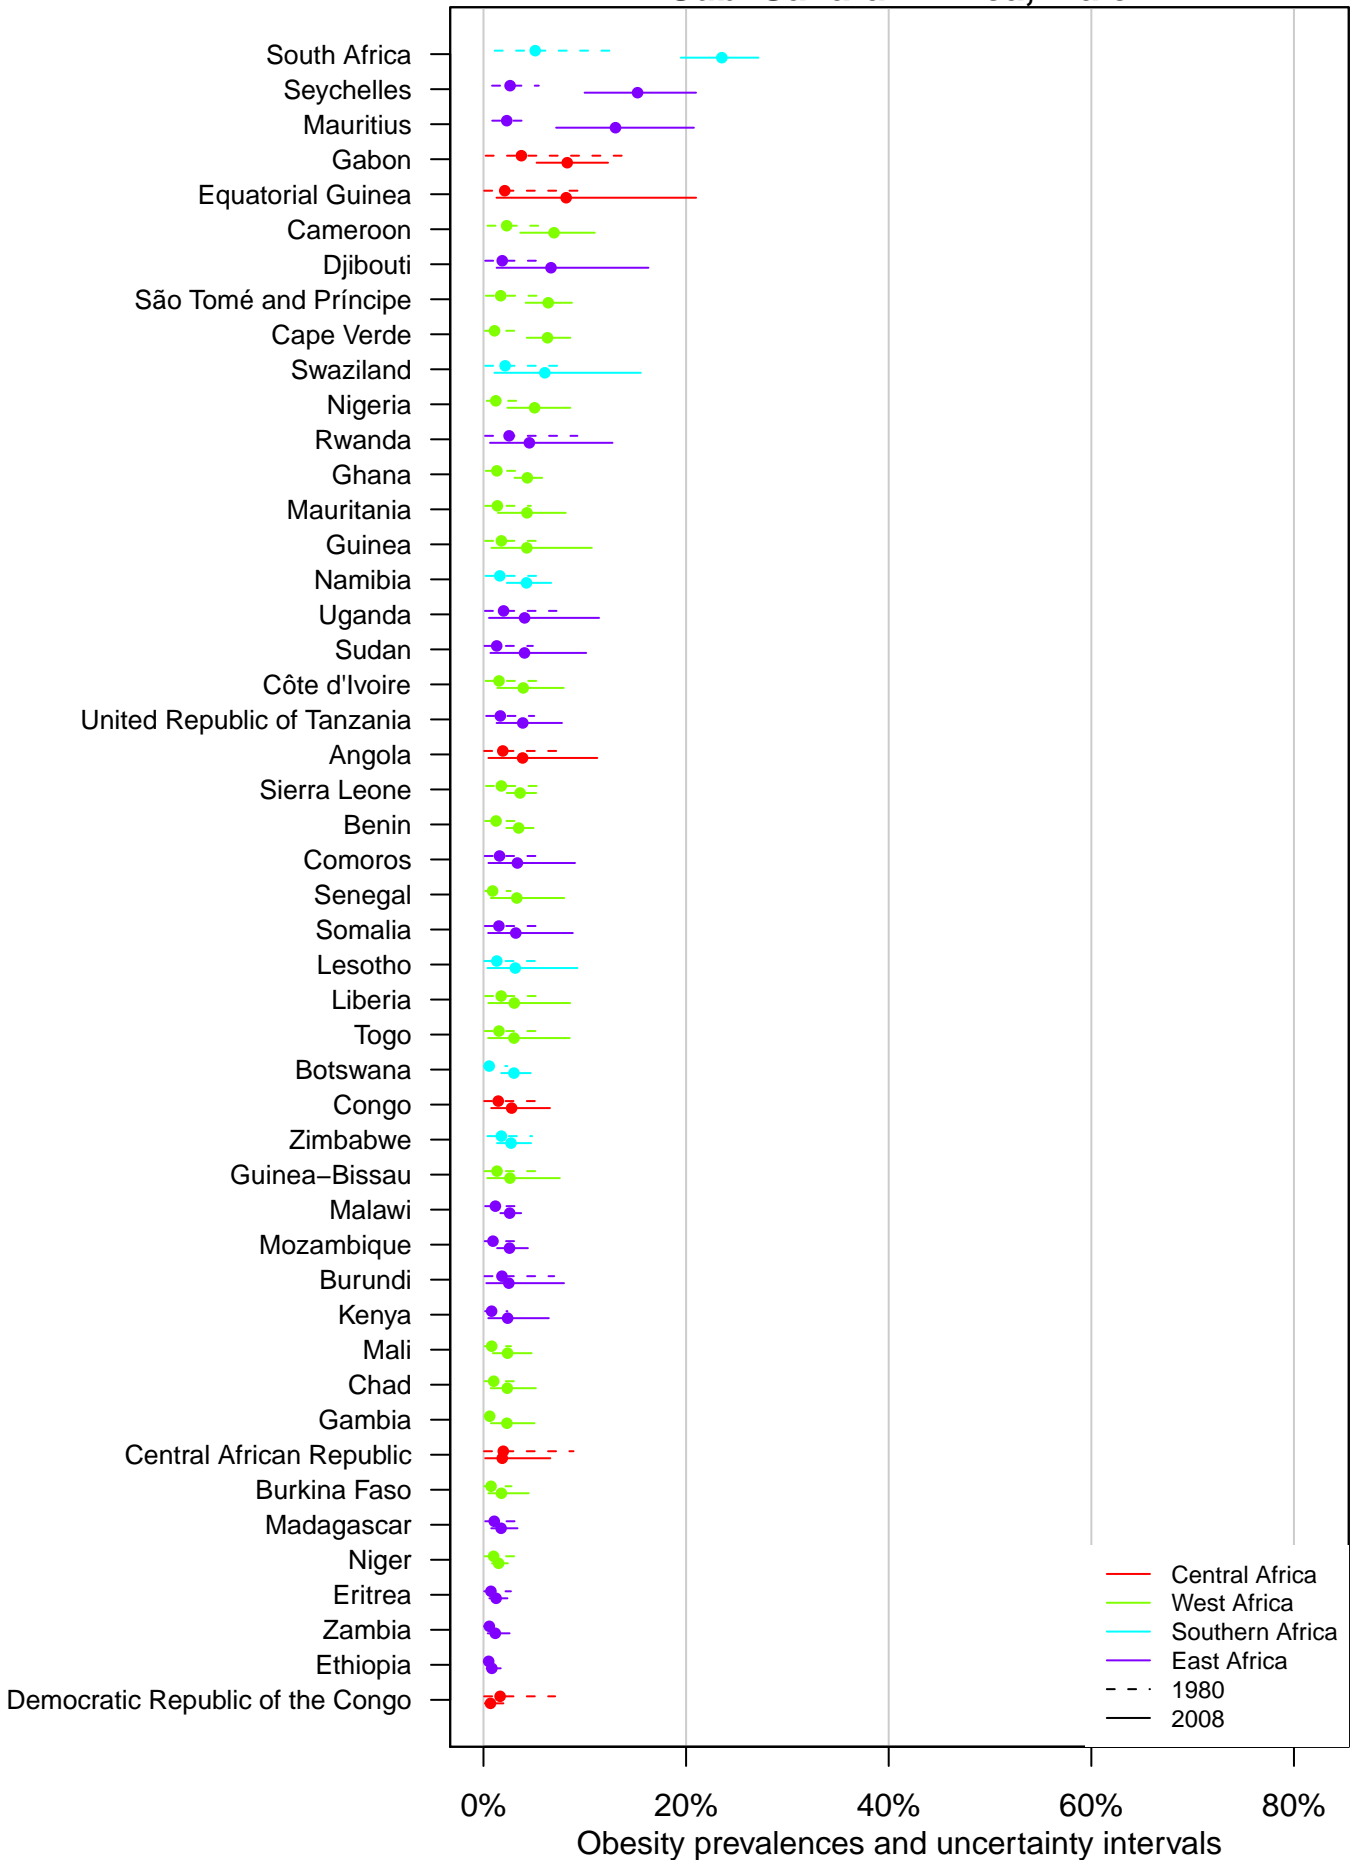

# North Africa and Middle East, female

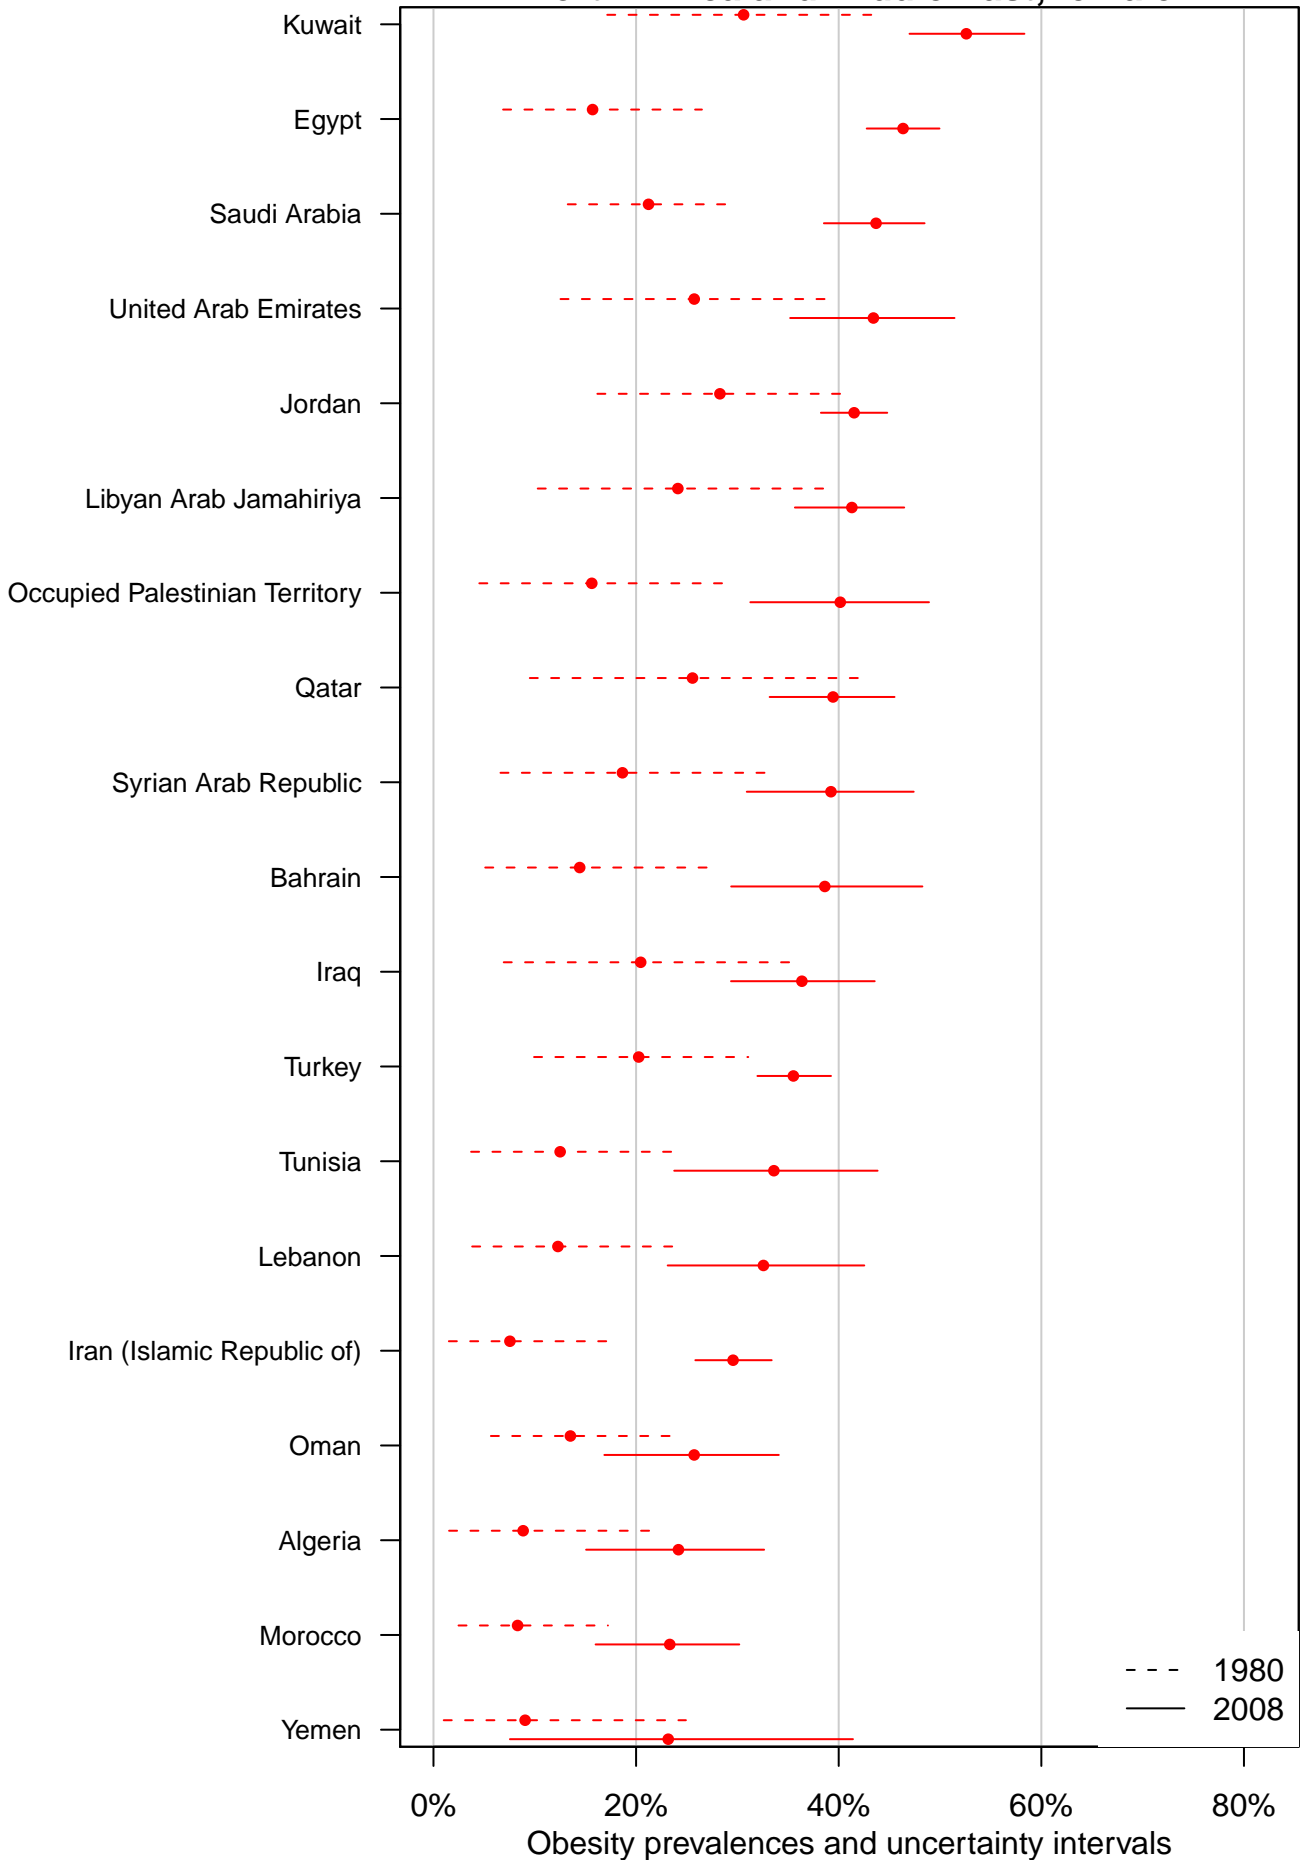

# North Africa and Middle East, male

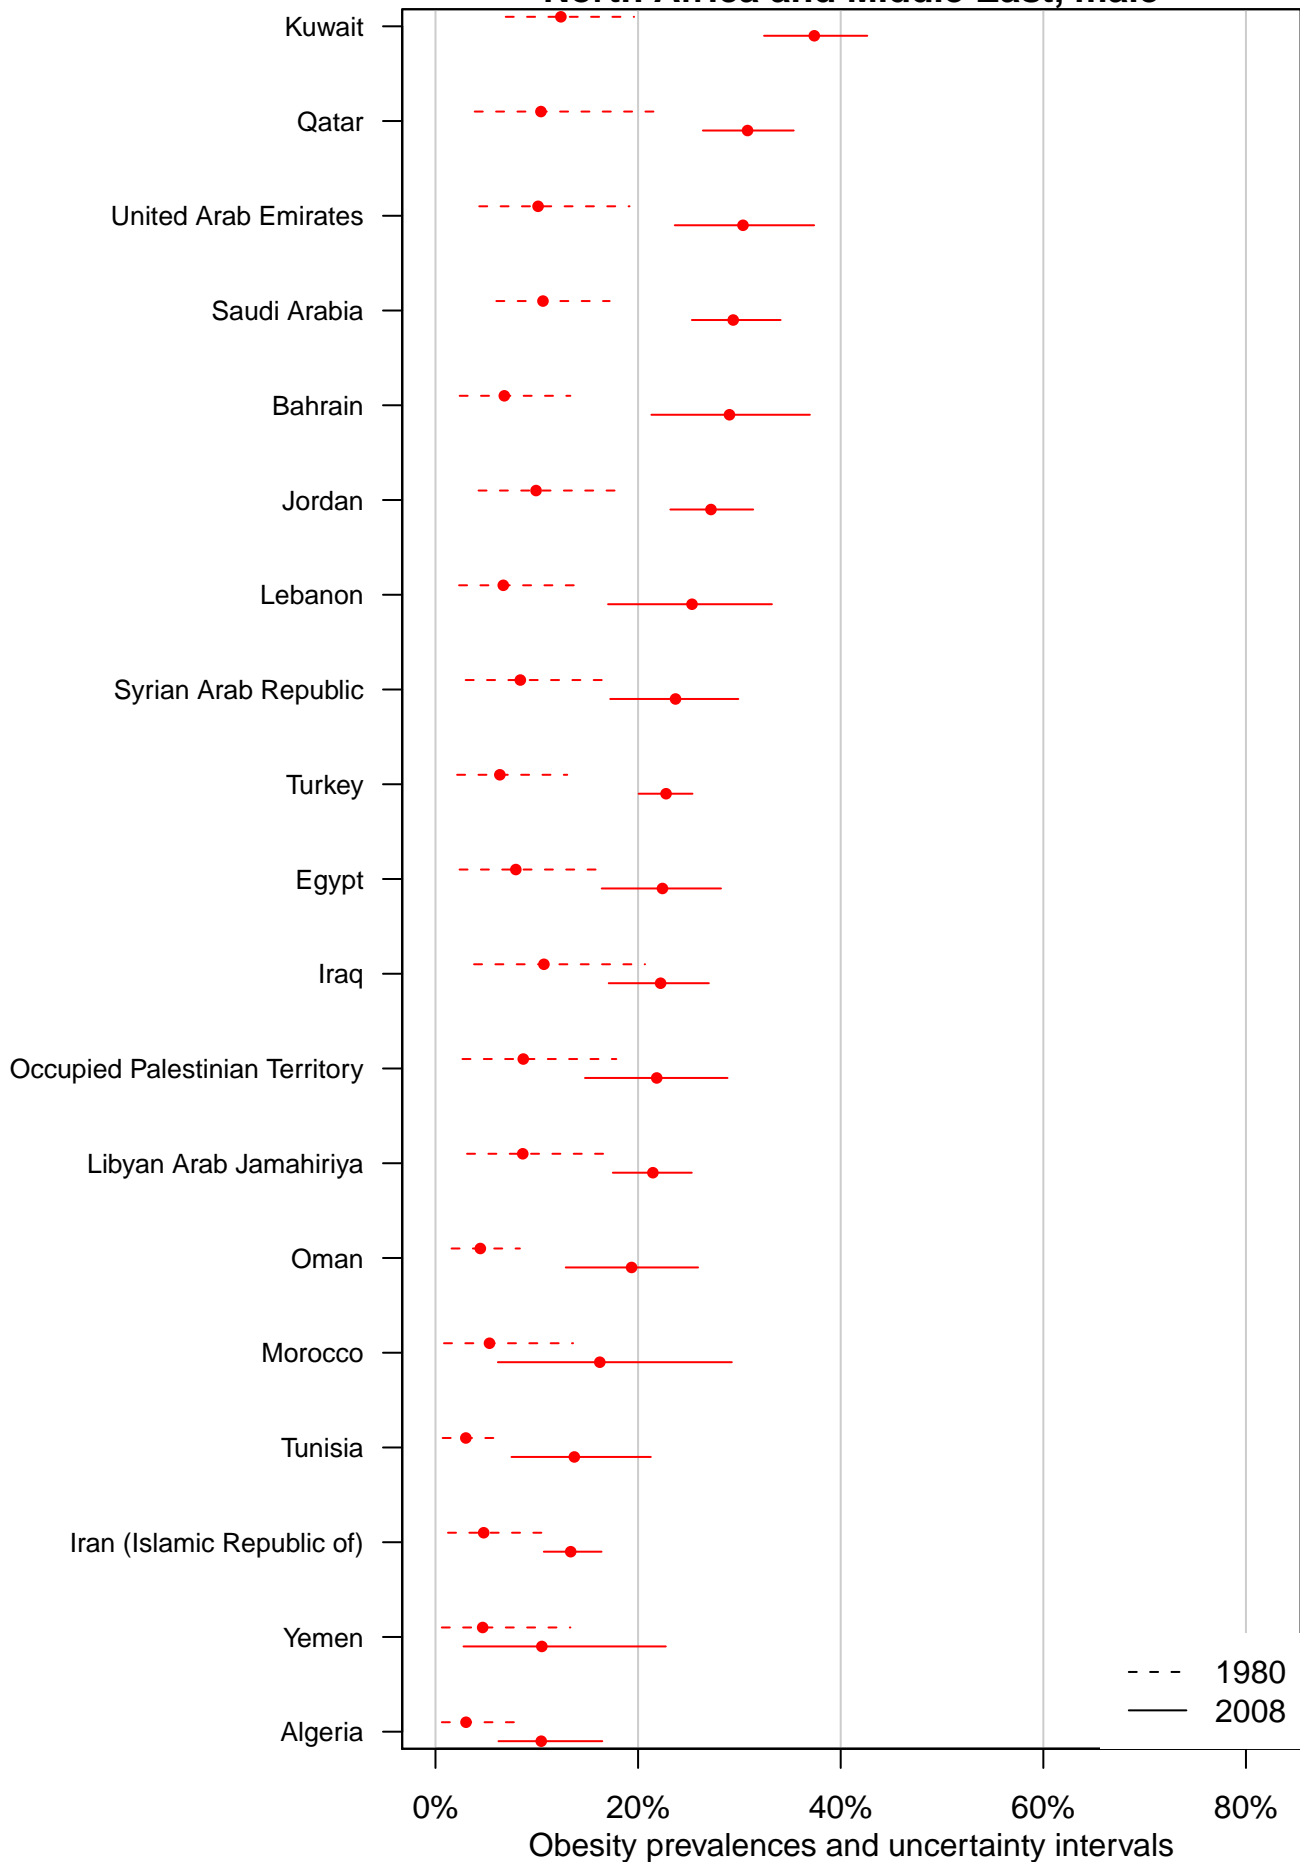

# South and East Asia and Pacific, female

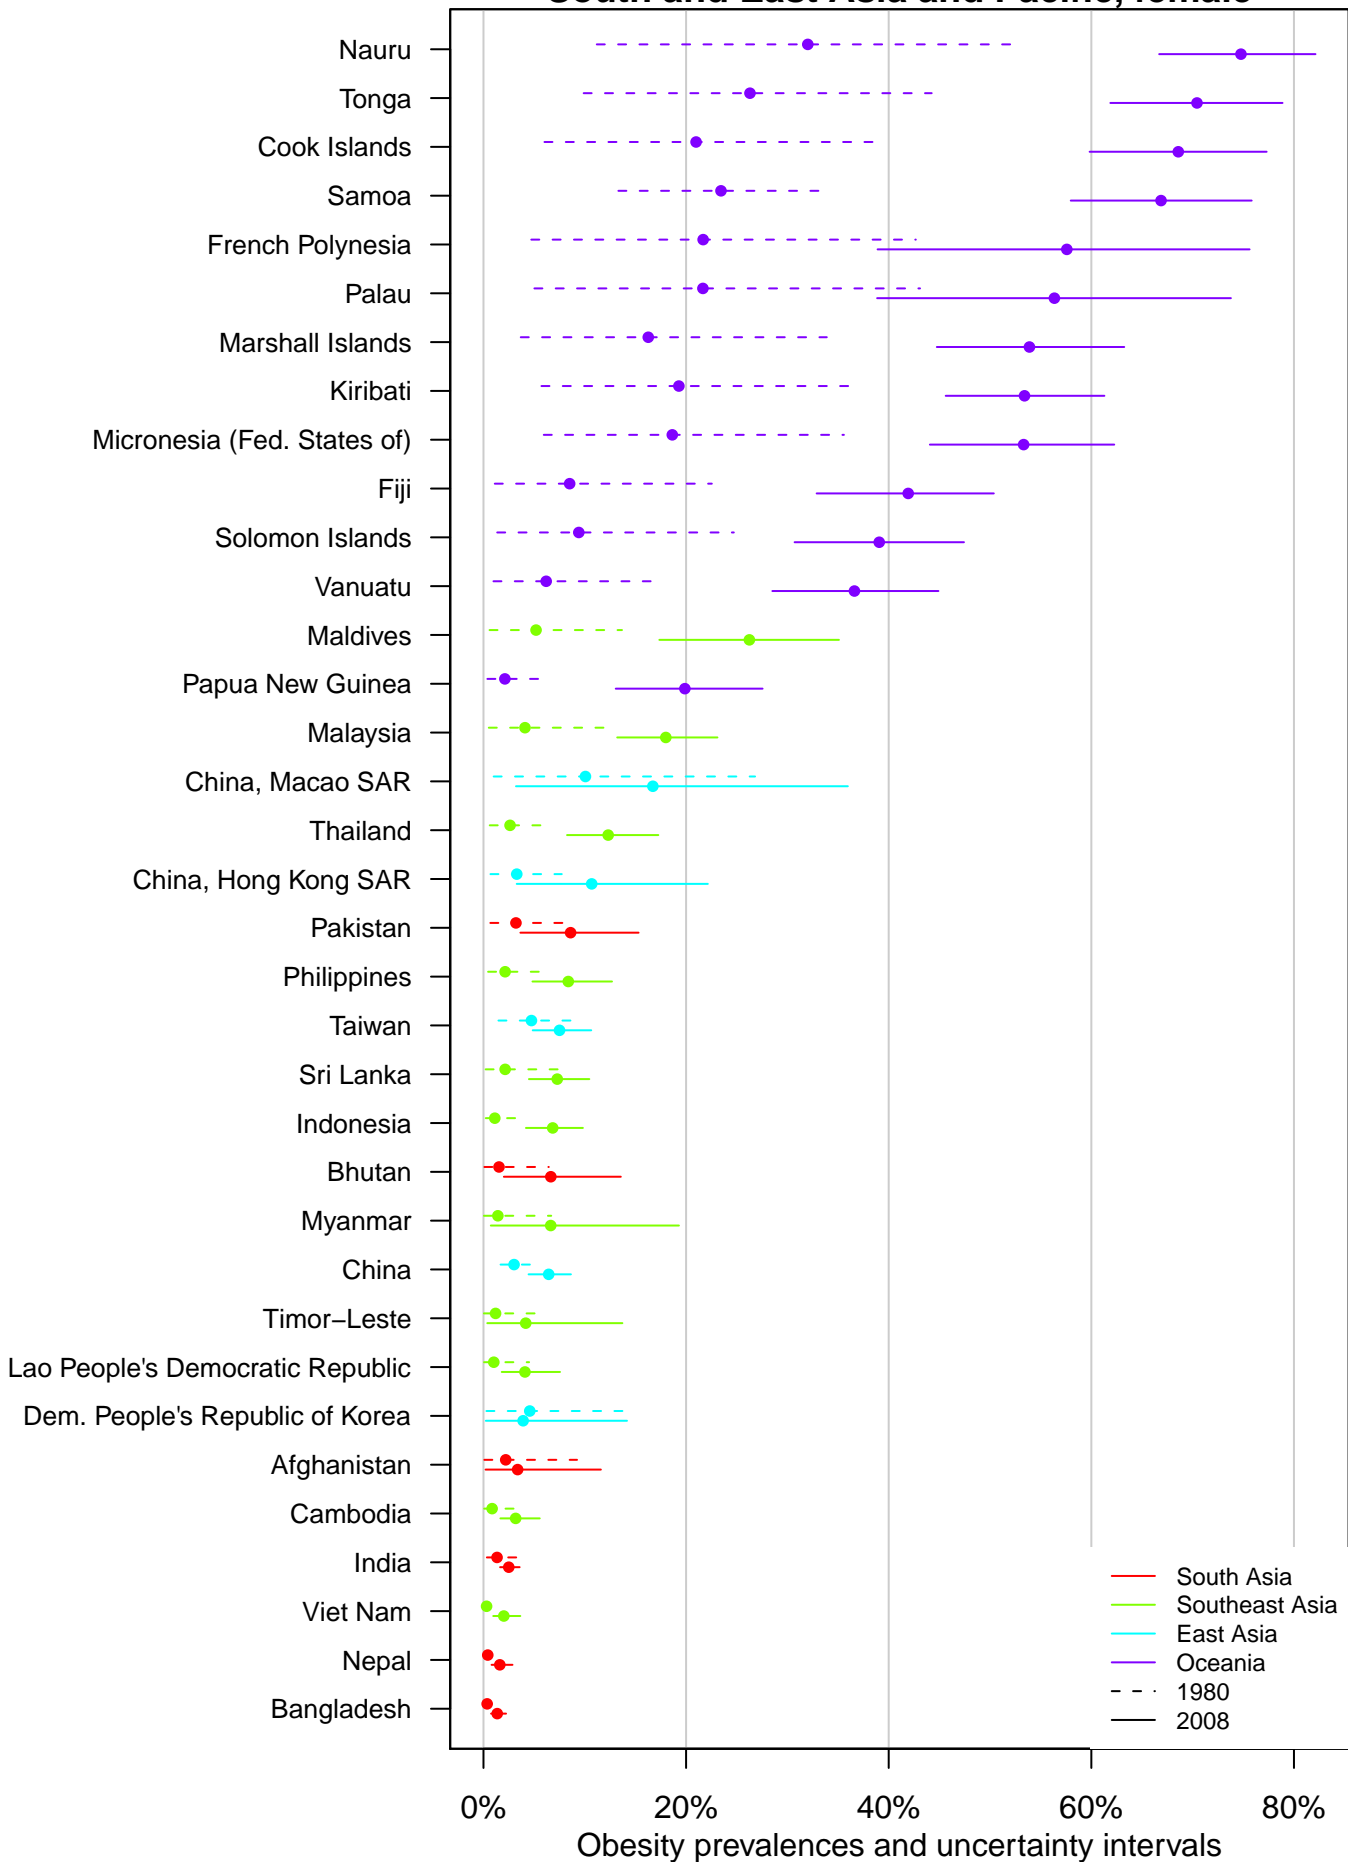

# South and East Asia and Pacific, male

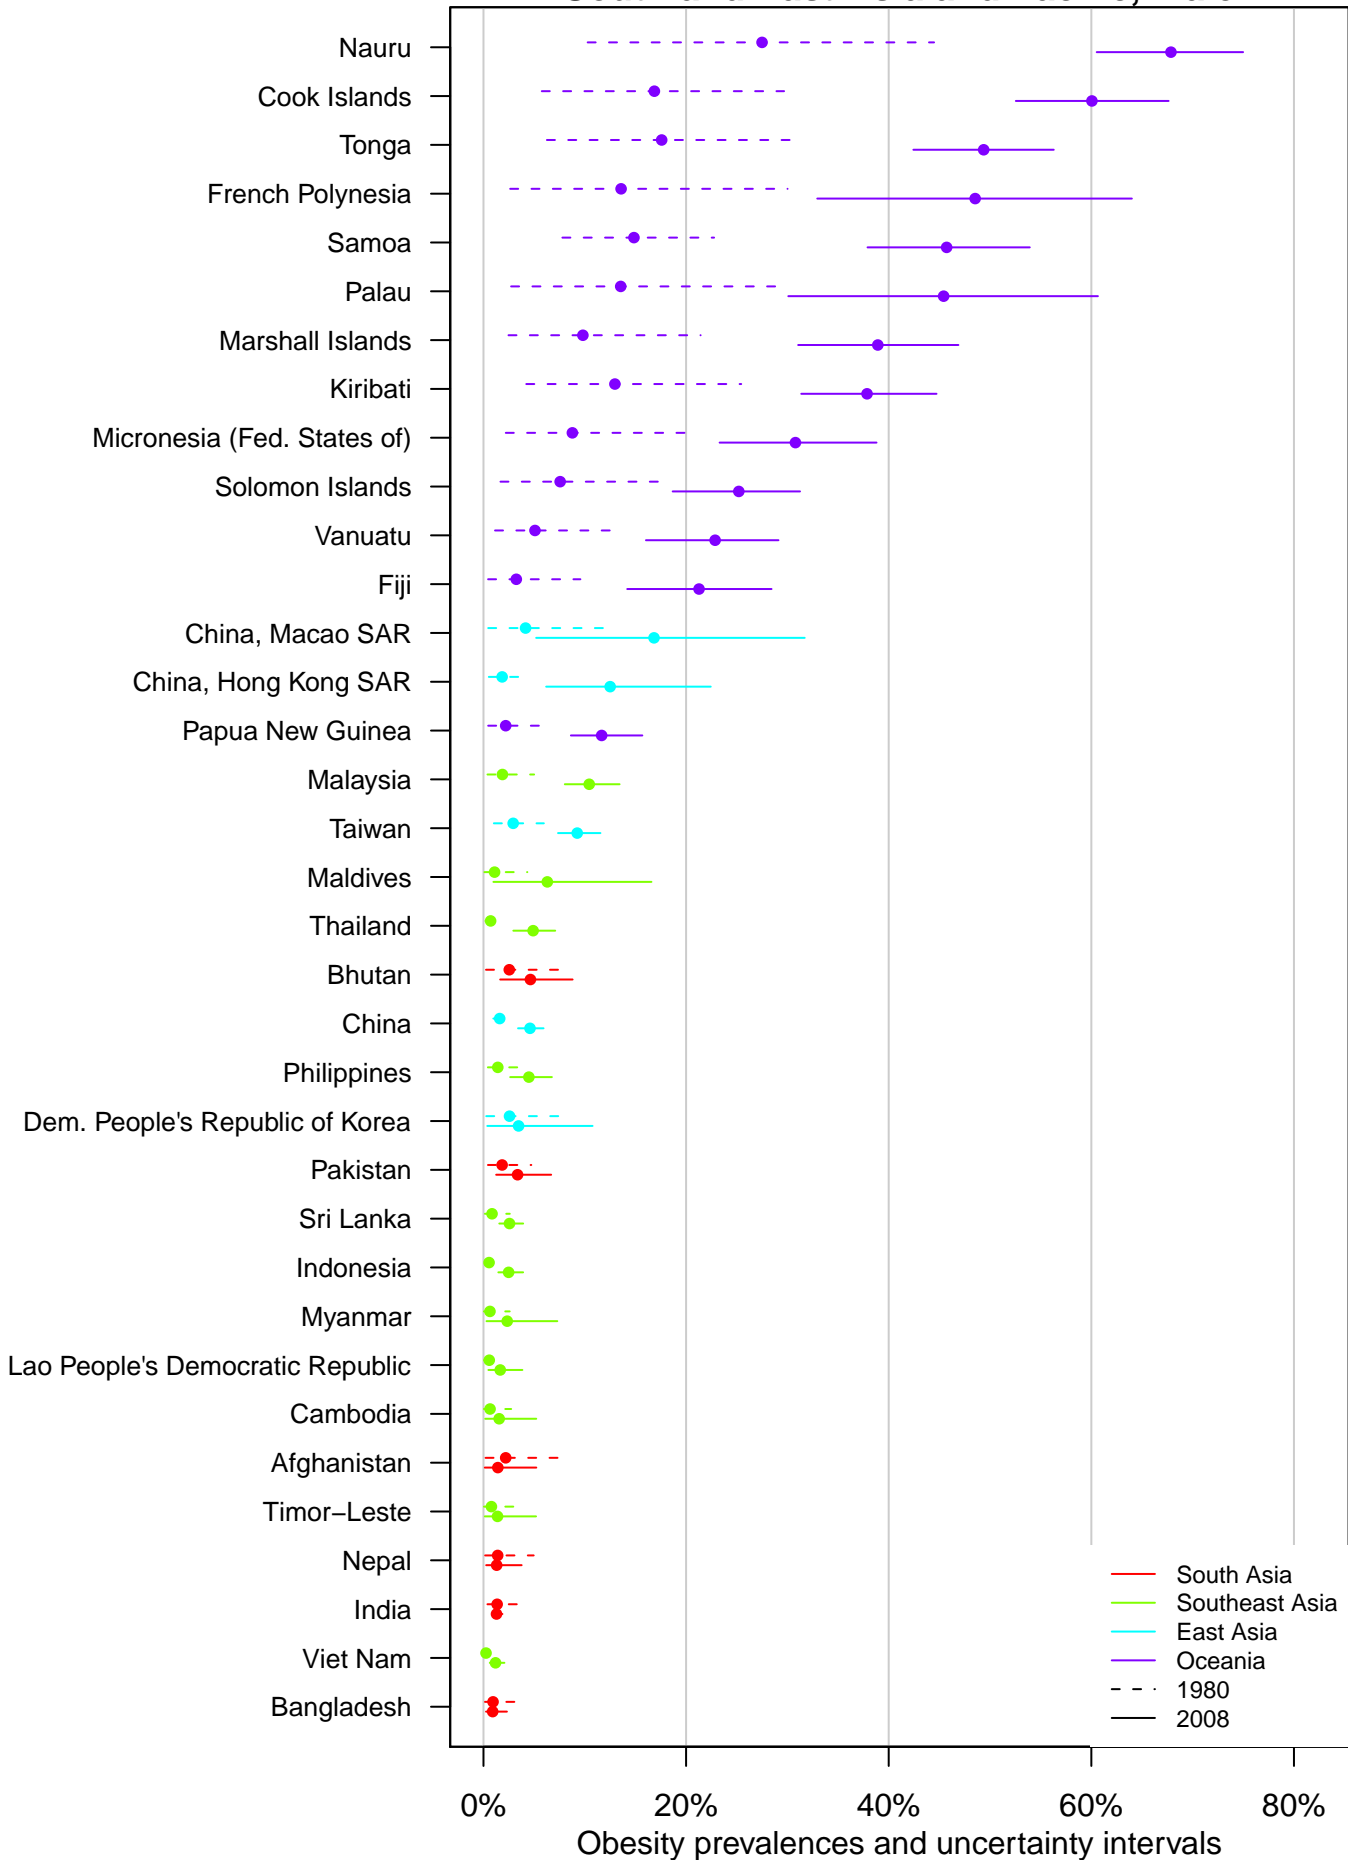

# Latin America and Caribbean, female

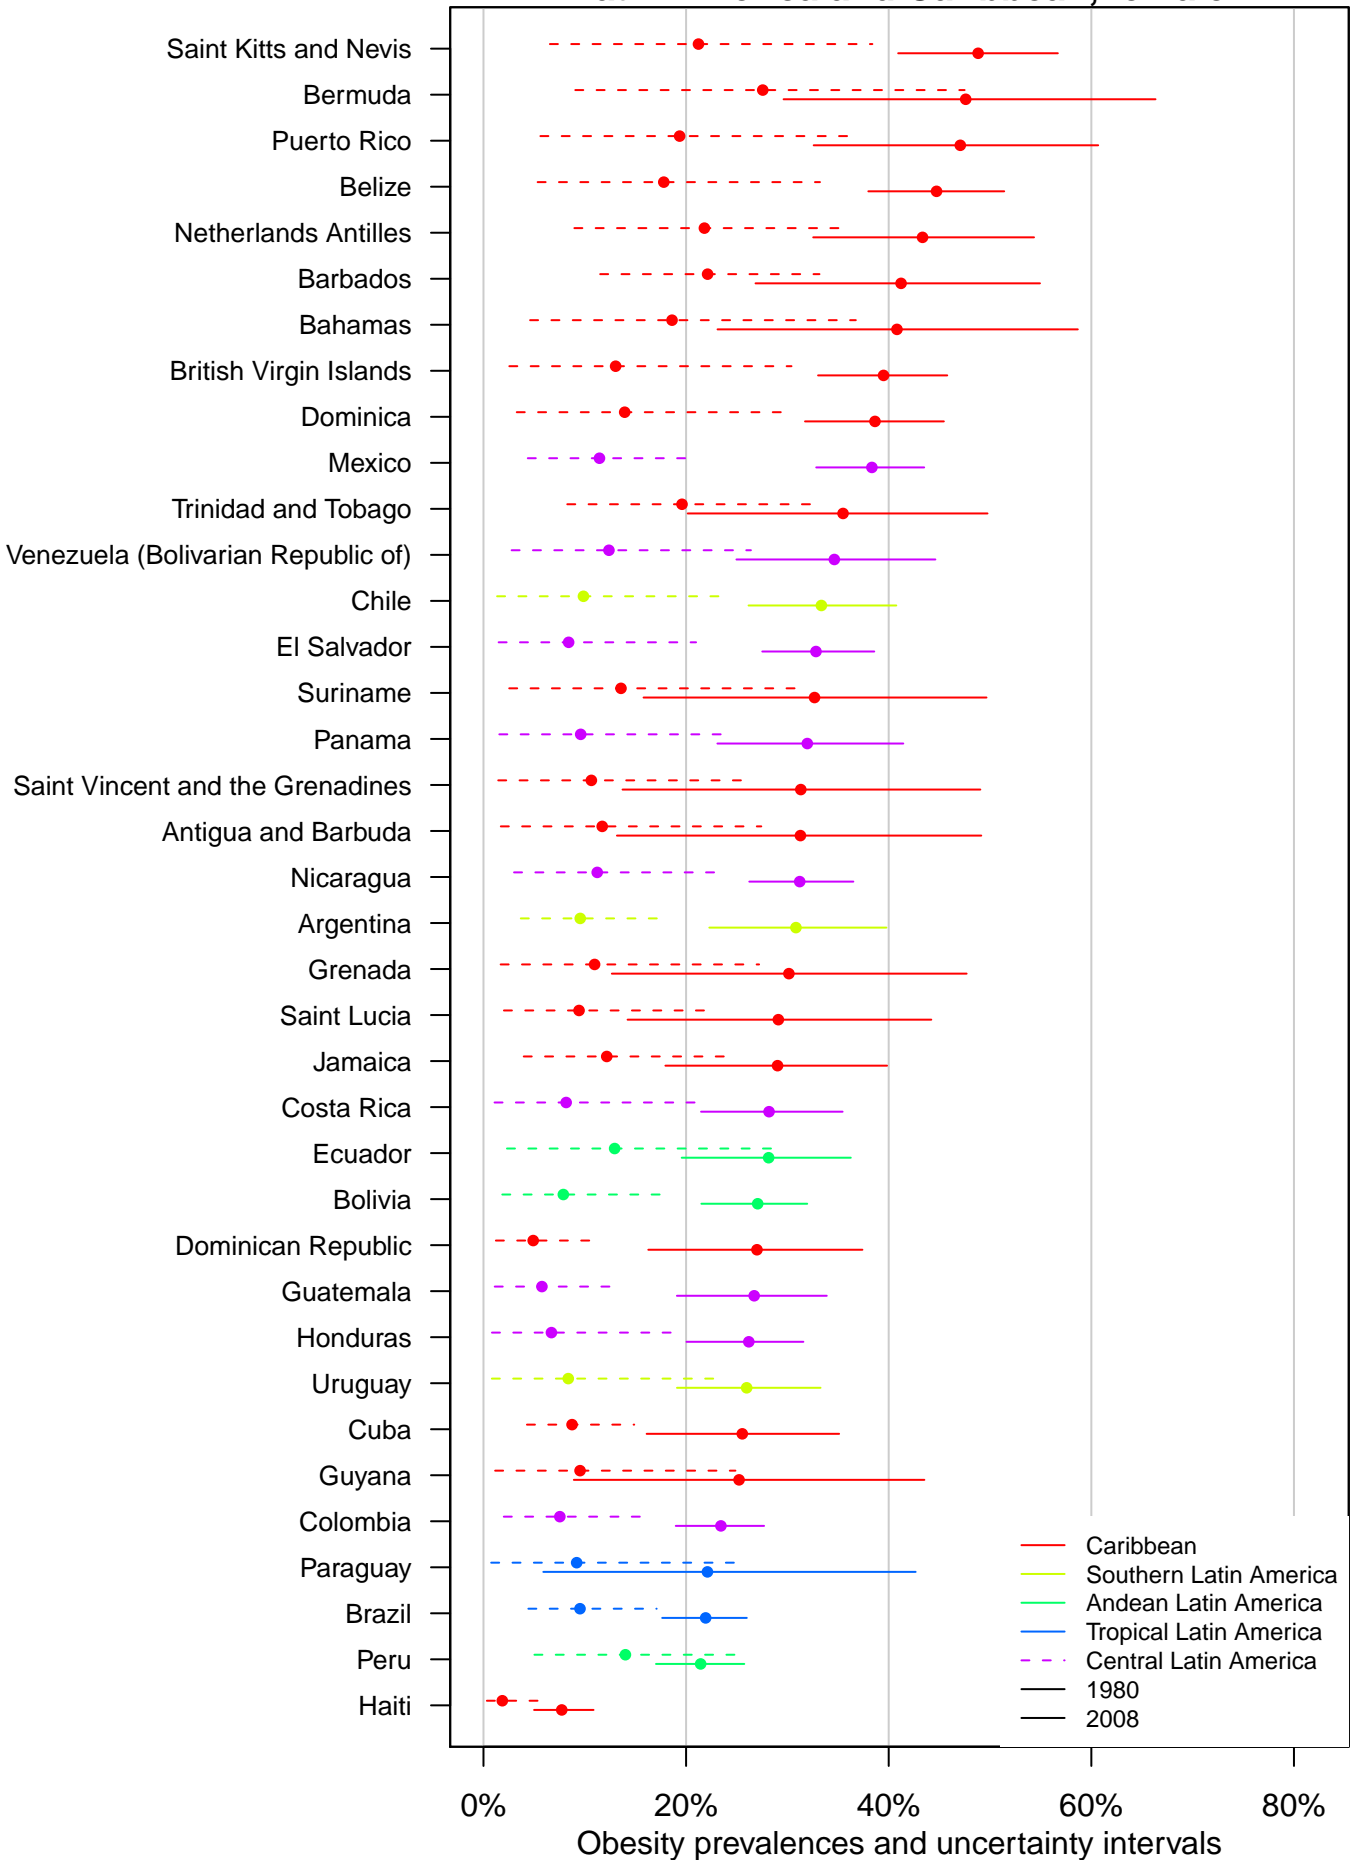

# Latin America and Caribbean, male

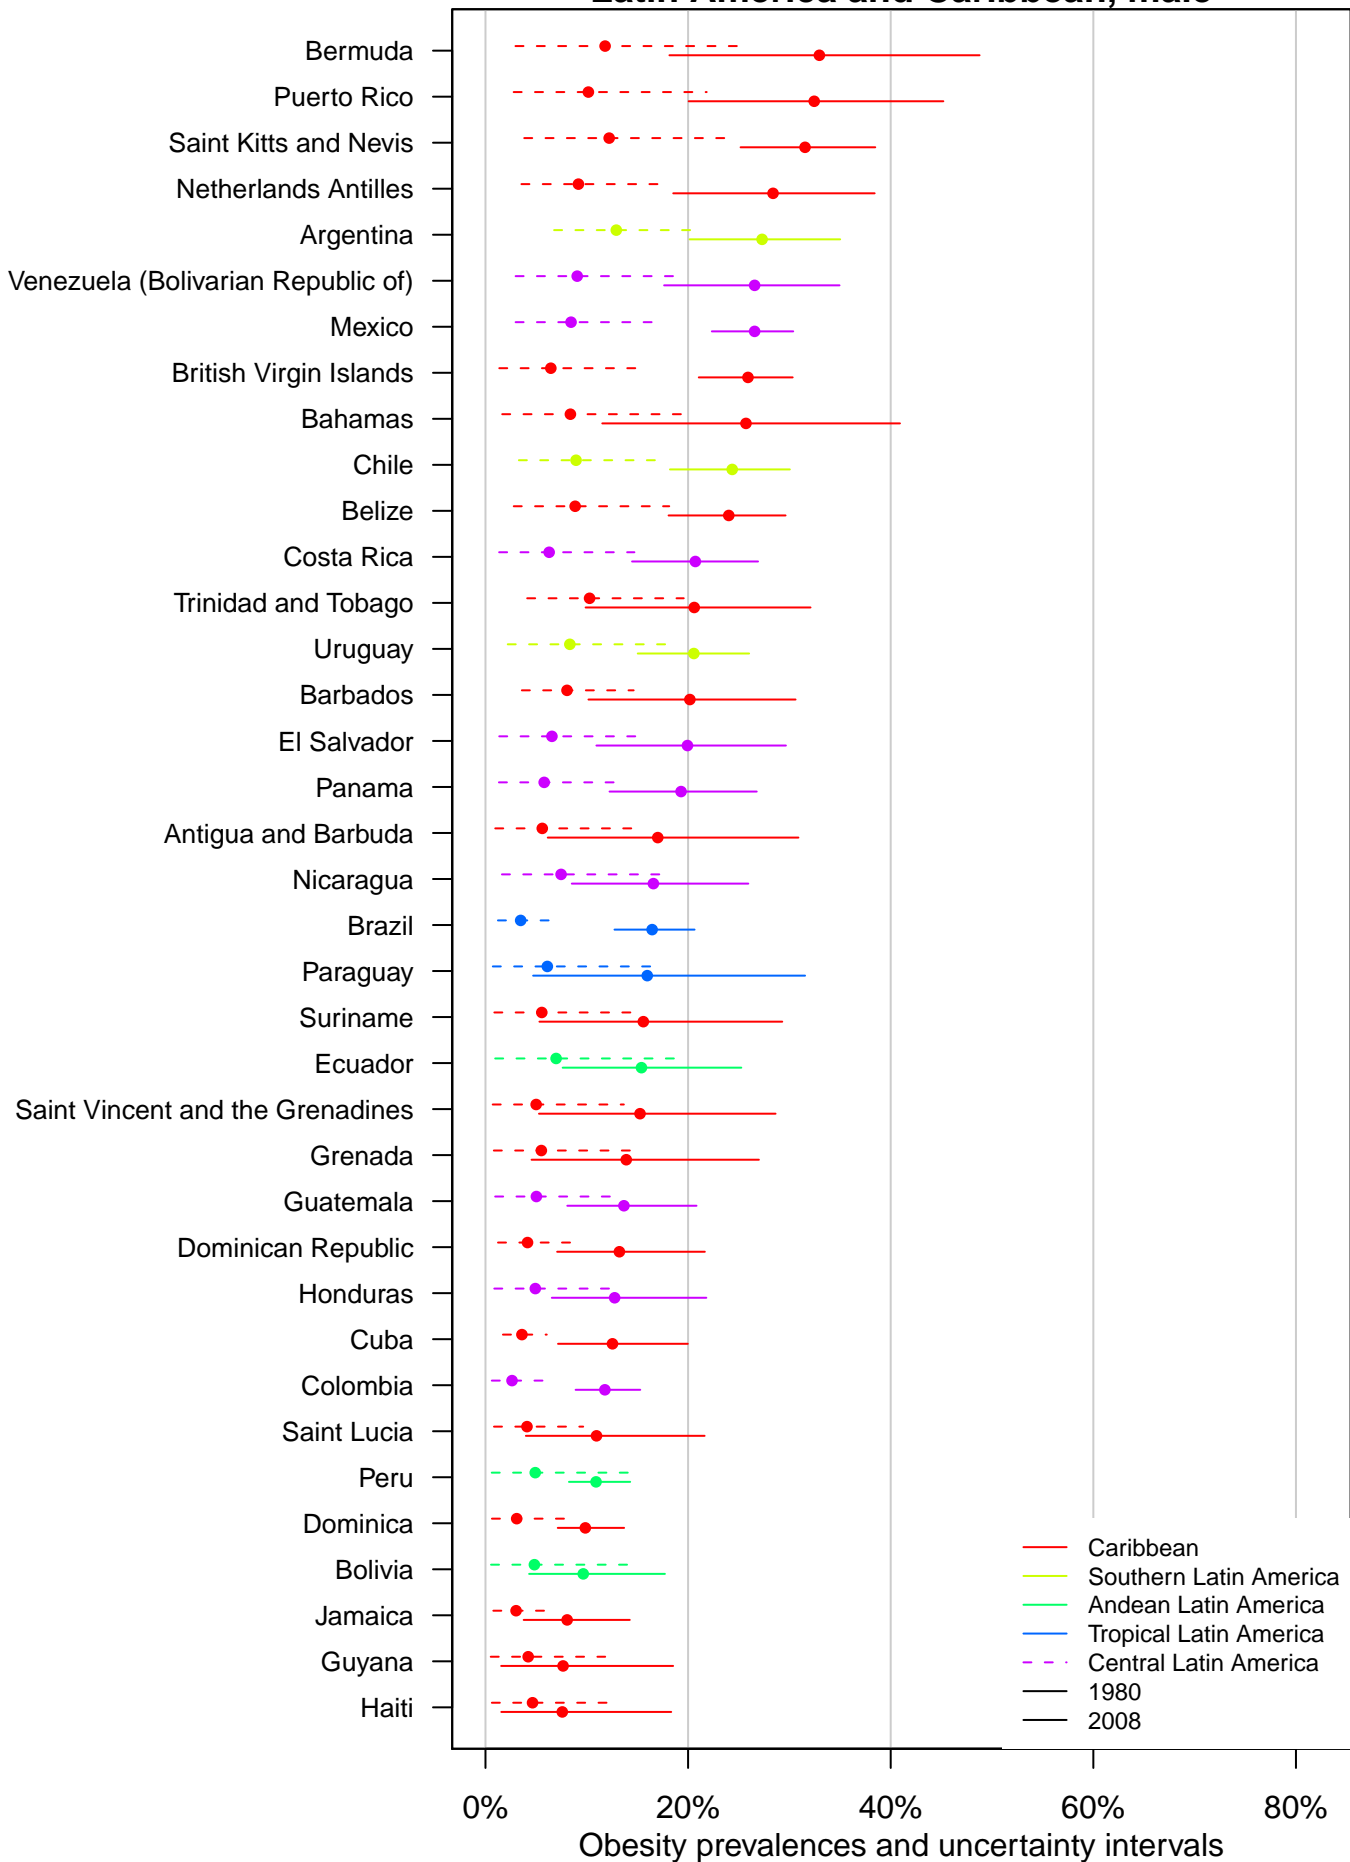

Supplement: 1478-7954-10-22-S1.pdf [file 1478-7954-10-22-S1.pdf]
