# Supplementary material for: National, regional, and global trends in adult overweight and obesity prevalences
Source: PubMed Central journal article supplement (PMC3543235; doi:10.1186/1478-7954-10-22), 2012-11-20

**Afghanistan (female)**

South Asia subregion  
South Asia region

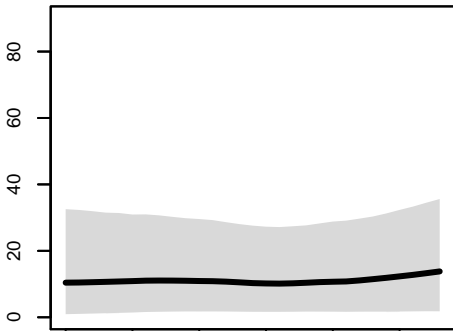

**Albania (female)**

Central Europe subregion  
Central and Eastern Europe and Central Asia region

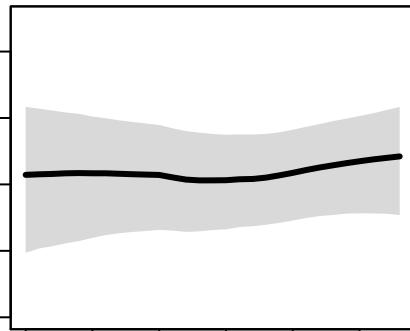

**Algeria (female)**

North Africa and Middle East subregion  
North Africa and Middle East region

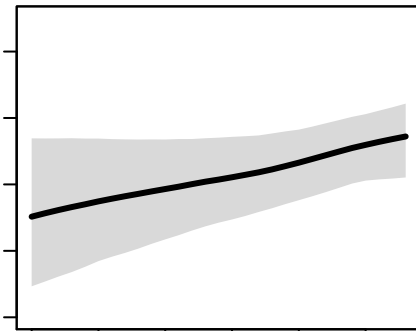

**Andorra (female)**

Western Europe subregion  
High-income regions

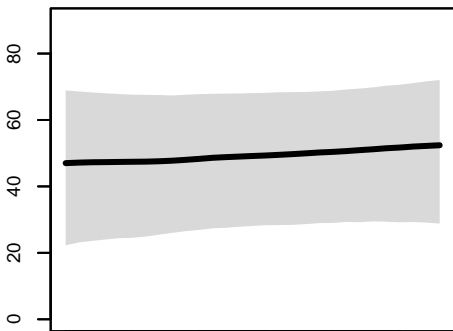

**Angola (female)**

Central Africa subregion  
Sub-Saharan Africa region

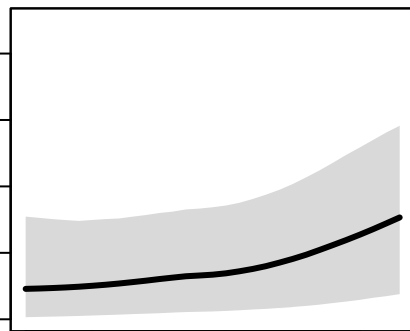

**Antigua and Barbuda (female)**

Caribbean subregion  
Latin America and Caribbean region

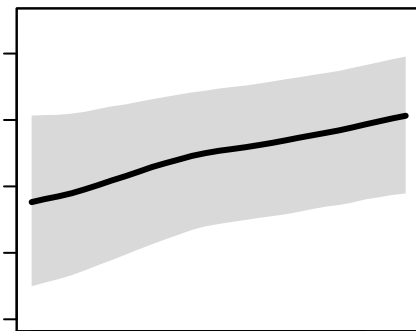

**Argentina (female)**

Southern Latin America subregion  
Latin America and Caribbean region

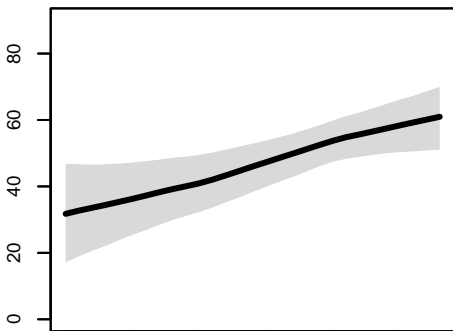

**Armenia (female)**

Central Asia subregion  
Central and Eastern Europe and Central Asia region

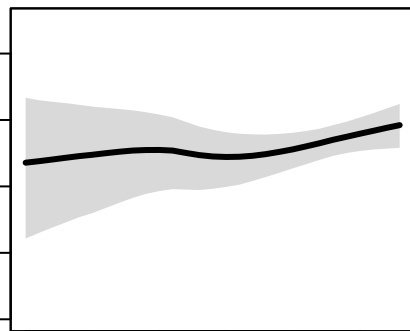

**Australia (female)**

Australasia subregion  
High-income regions

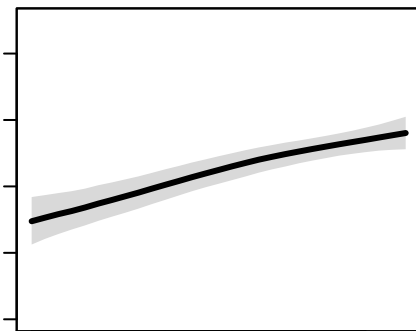

**Austria (female)**

Western Europe subregion  
High-income regions

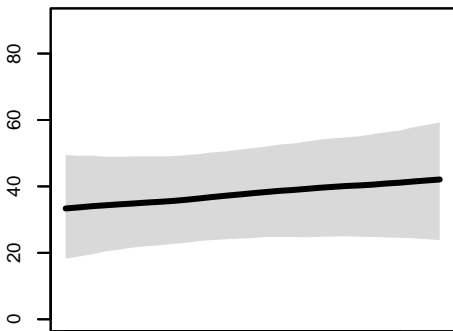

**Azerbaijan (female)**

Central Asia subregion  
Central and Eastern Europe and Central Asia region

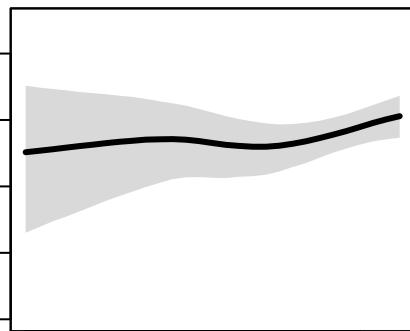

**Bahamas (female)**

Caribbean subregion  
Latin America and Caribbean region

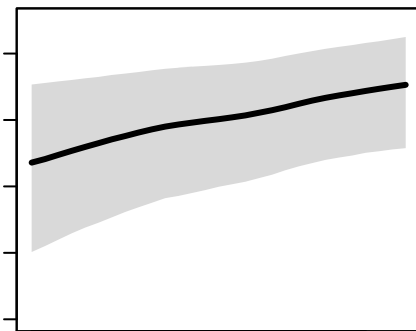

1980 1985 1990 1995 2000 2005

1980 1985 1990 1995 2000 2005

1980 1985 1990 1995 2000 2005

**Bahrain (female)**

North Africa and Middle East subregion  
North Africa and Middle East region

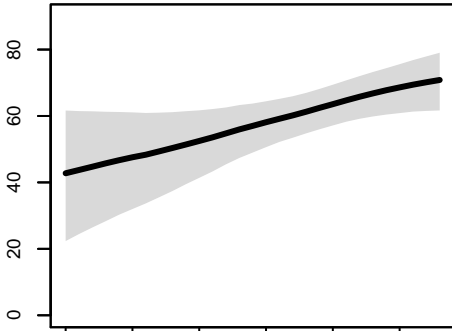

**Bangladesh (female)**

South Asia subregion  
South Asia region

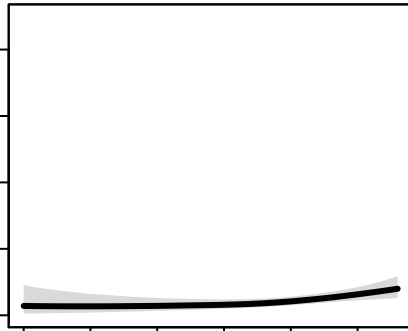

**Barbados (female)**

Caribbean subregion  
Latin America and Caribbean region

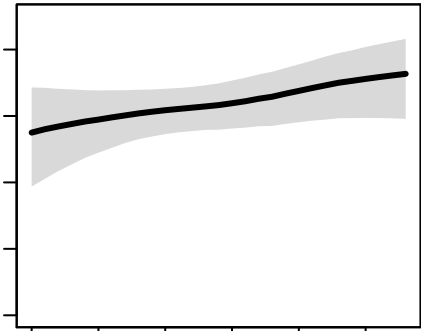

**Belarus (female)**

Eastern Europe subregion  
Central and Eastern Europe and Central Asia region

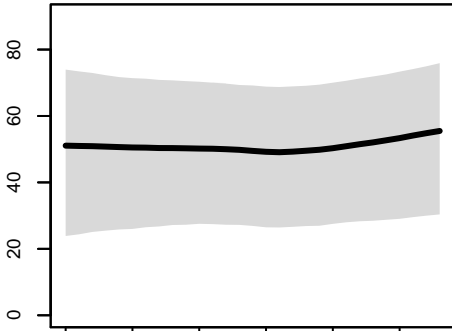

**Belgium (female)**

Western Europe subregion  
High-income regions

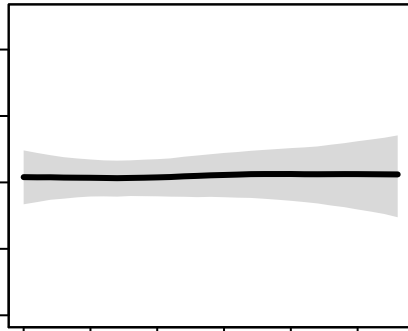

**Belize (female)**

Caribbean subregion  
Latin America and Caribbean region

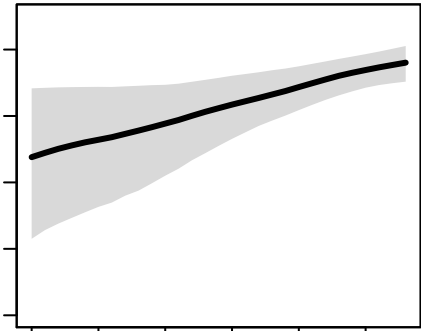

**Benin (female)**

West Africa subregion  
Sub-Saharan Africa region

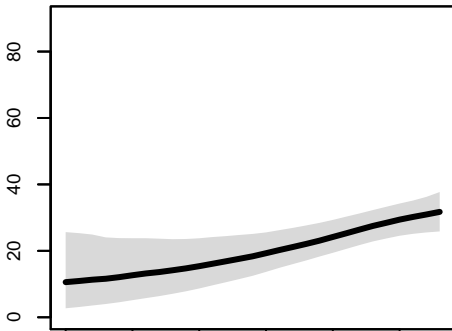

**Bermuda (female)**

Caribbean subregion  
Latin America and Caribbean region

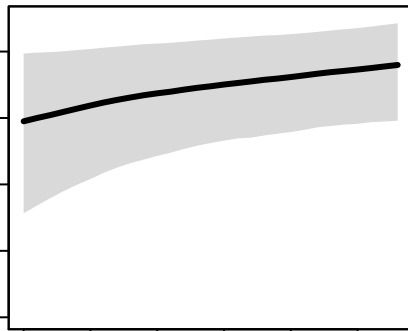

**Bhutan (female)**

South Asia subregion  
South Asia region

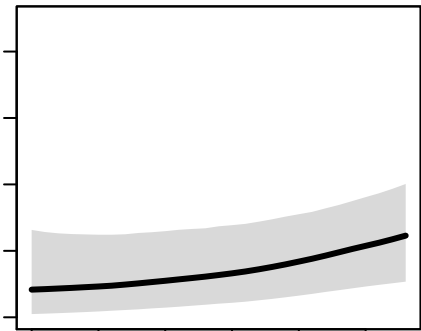

**Bolivia (female)**

Andean Latin America subregion  
Latin America and Caribbean region

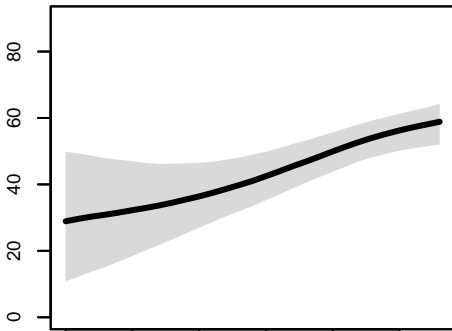

**Bosnia and Herzegovina (female)**

Central Europe subregion  
Central and Eastern Europe and Central Asia region

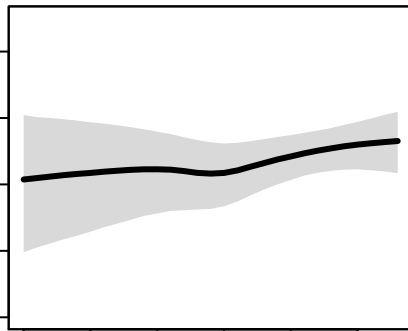

**Botswana (female)**

Southern Africa subregion  
Sub-Saharan Africa region

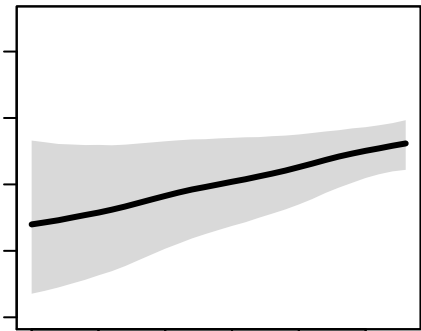

**Brazil (female)**Tropical Latin America subregion  
Latin America and Caribbean region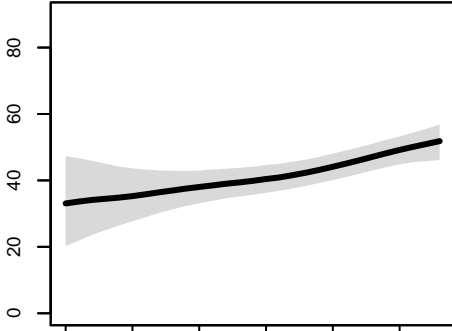**British Virgin Islands (female)**Caribbean subregion  
Latin America and Caribbean region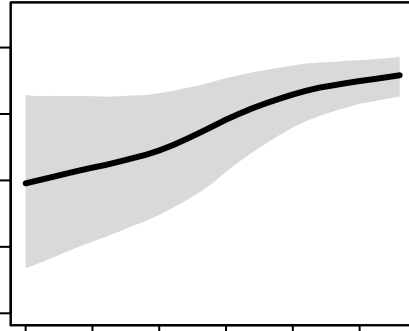**Brunei Darussalam (female)**Asia-Pacific, high-income subregion  
High-income regions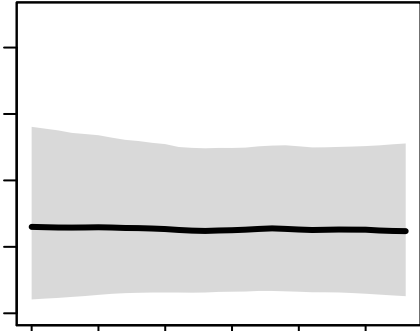**Bulgaria (female)**Central Europe subregion  
Central and Eastern Europe and Central Asia region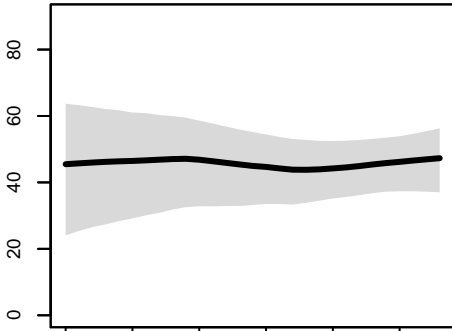**Burkina Faso (female)**West Africa subregion  
Sub-Saharan Africa region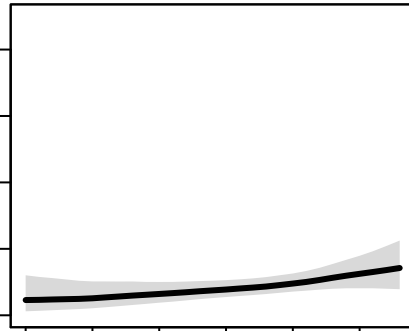**Burundi (female)**East Africa subregion  
Sub-Saharan Africa region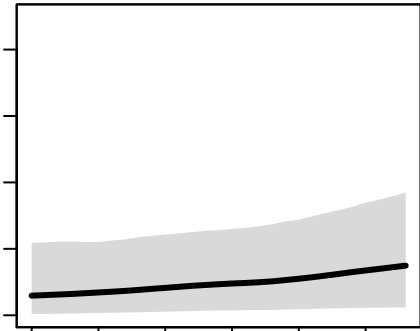**Cambodia (female)**Southeast Asia subregion  
East Asia and Pacific region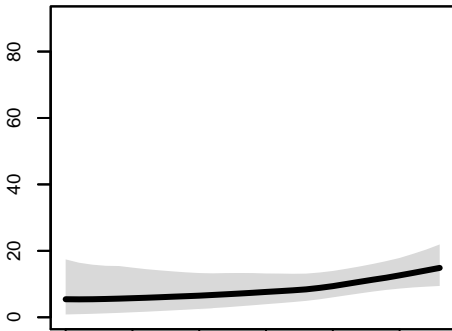**Cameroon (female)**West Africa subregion  
Sub-Saharan Africa region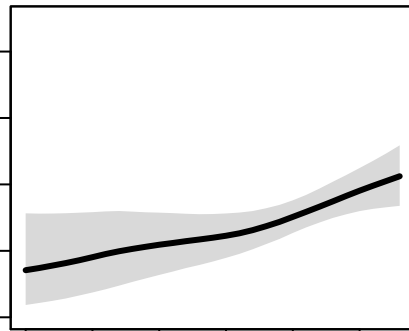**Canada (female)**North America, high-income subregion  
High-income regions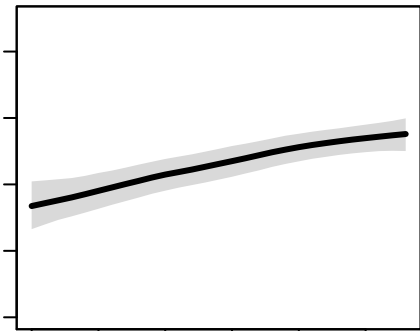**Cape Verde (female)**West Africa subregion  
Sub-Saharan Africa region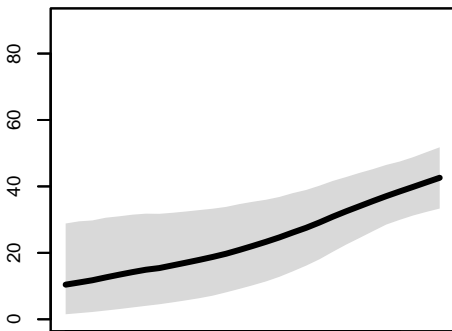**Central African Republic (female)**Central Africa subregion  
Sub-Saharan Africa region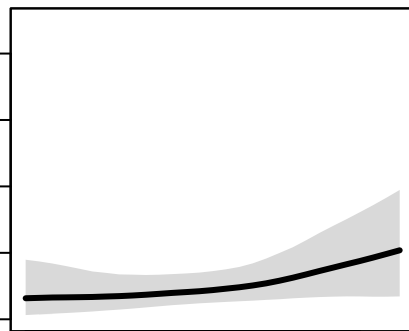**Chad (female)**West Africa subregion  
Sub-Saharan Africa region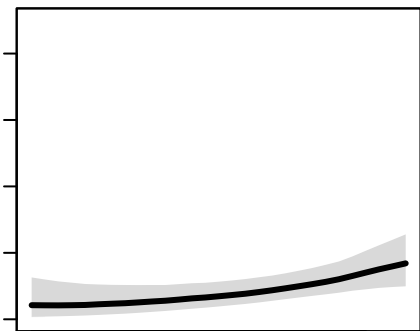

1980 1985 1990 1995 2000 2005

1980 1985 1990 1995 2000 2005

1980 1985 1990 1995 2000 2005

**Chile (female)**Southern Latin America subregion  
Latin America and Caribbean region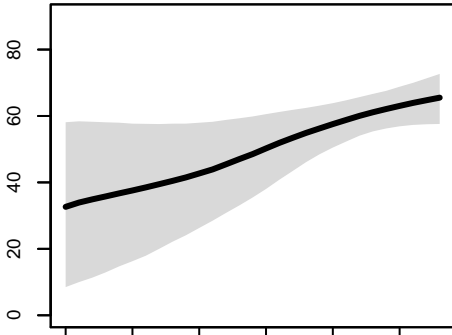**China (female)**East Asia subregion  
East Asia and Pacific region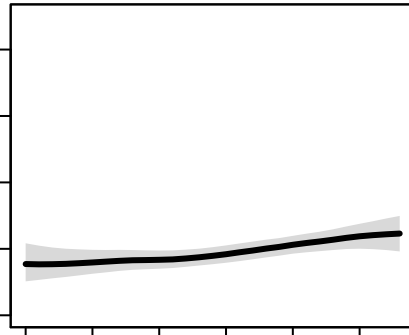**China (Hong Kong SAR) (female)**East Asia subregion  
East Asia and Pacific region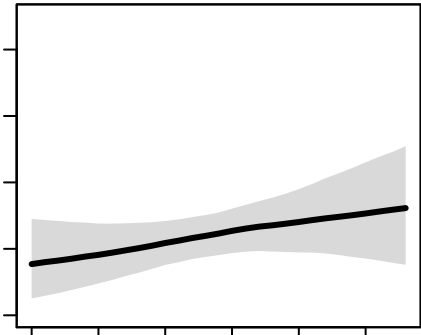**China (Macao SAR) (female)**East Asia subregion  
East Asia and Pacific region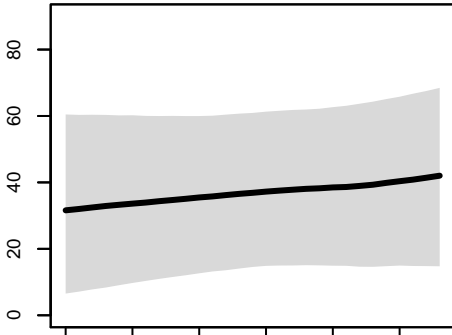**Colombia (female)**Central Latin America subregion  
Latin America and Caribbean region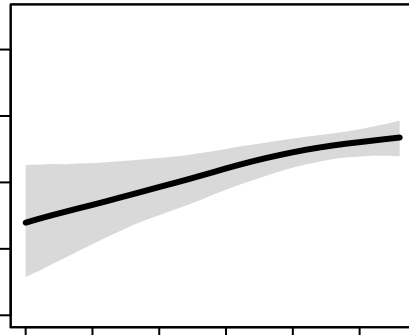**Comoros (female)**East Africa subregion  
Sub-Saharan Africa region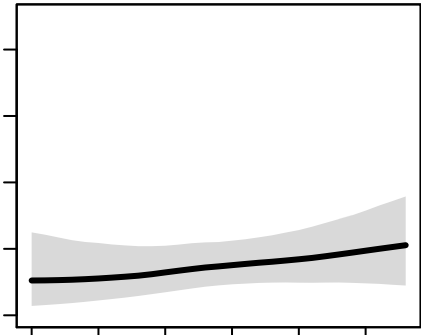**Congo (female)**Central Africa subregion  
Sub-Saharan Africa region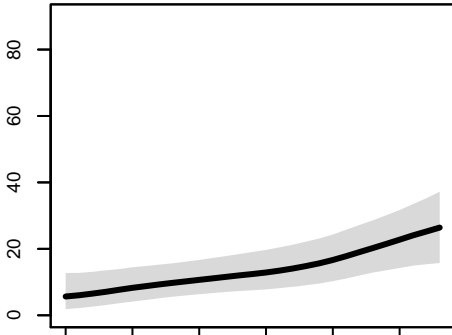**Cook Islands (female)**Oceania subregion  
East Asia and Pacific region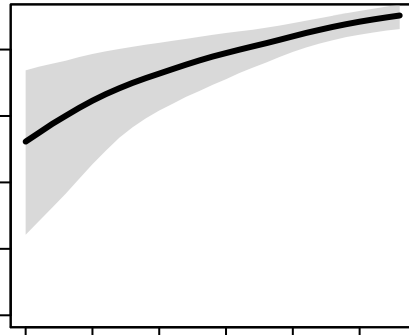**Costa Rica (female)**Central Latin America subregion  
Latin America and Caribbean region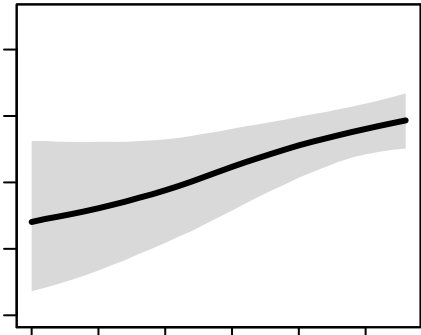**Cote d'Ivoire (female)**West Africa subregion  
Sub-Saharan Africa region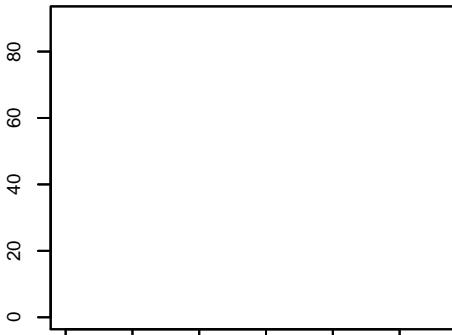**Croatia (female)**Central Europe subregion  
Central and Eastern Europe and Central Asia region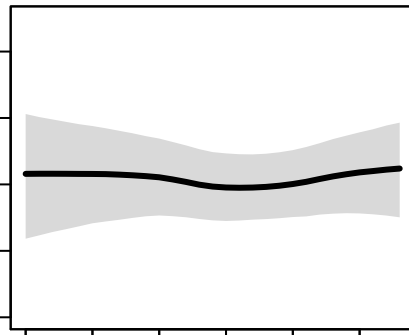**Cuba (female)**Caribbean subregion  
Latin America and Caribbean region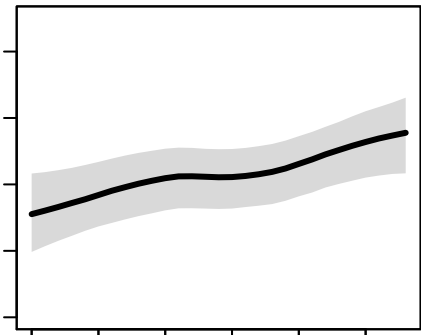

1980 1985 1990 1995 2000 2005

1980 1985 1990 1995 2000 2005

1980 1985 1990 1995 2000 2005

**Cyprus (female)**

Western Europe subregion  
High-income regions

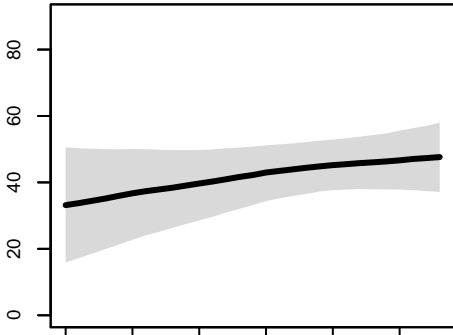

**Czech Republic (female)**

Central Europe subregion  
Central and Eastern Europe and Central Asia region

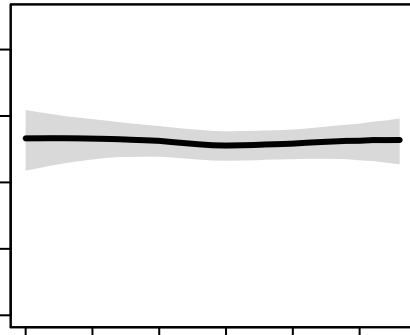

**Democratic People's Republic of Korea (female)**

East Asia subregion  
East Asia and Pacific region

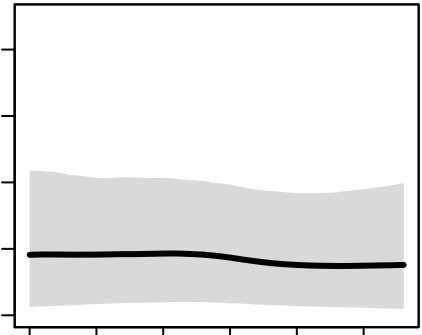

**Democratic Republic of the Congo (female)**

Central Africa subregion  
Sub-Saharan Africa region

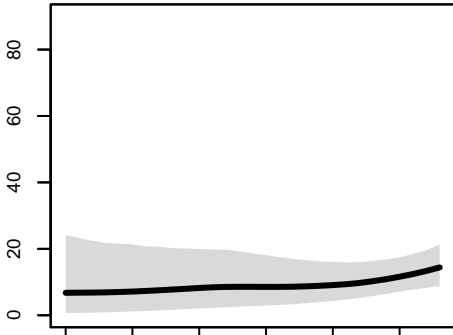

**Denmark (female)**

Western Europe subregion  
High-income regions

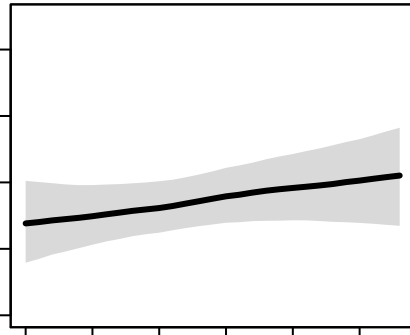

**Djibouti (female)**

East Africa subregion  
Sub-Saharan Africa region

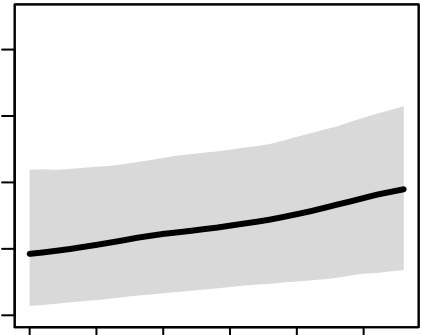

**Dominica (female)**

Caribbean subregion  
Latin America and Caribbean region

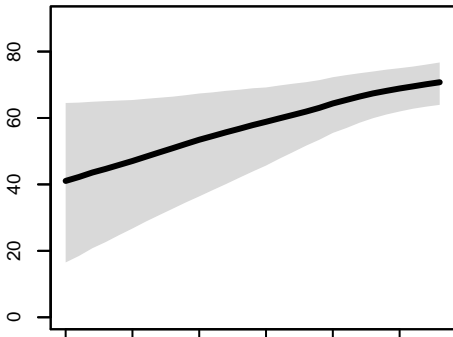

**Dominican Republic (female)**

Caribbean subregion  
Latin America and Caribbean region

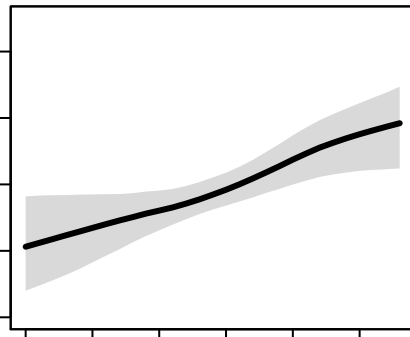

**Ecuador (female)**

Andean Latin America subregion  
Latin America and Caribbean region

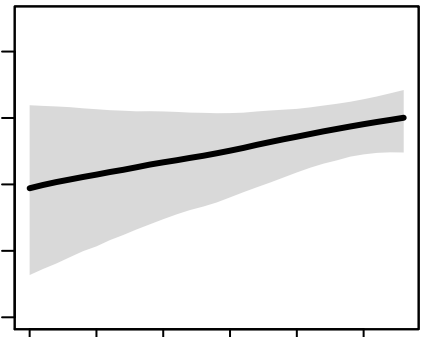

**Egypt (female)**

North Africa and Middle East subregion  
North Africa and Middle East region

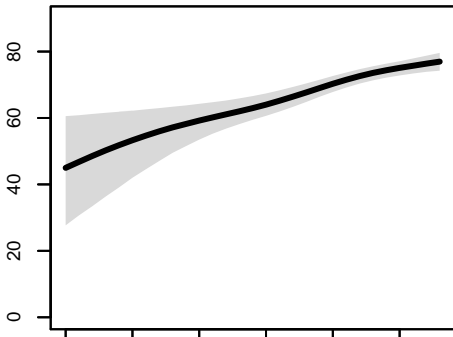

**El Salvador (female)**

Central Latin America subregion  
Latin America and Caribbean region

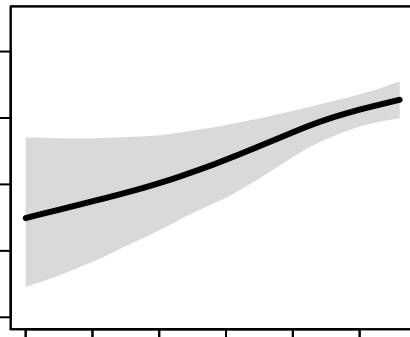

**Equatorial Guinea (female)**

Central Africa subregion  
Sub-Saharan Africa region

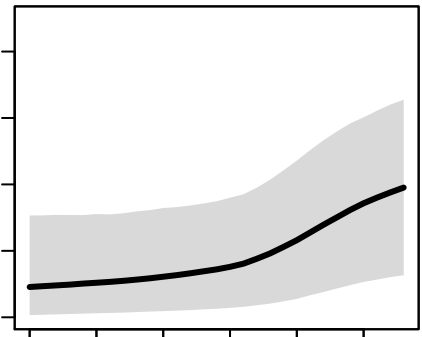

**Eritrea (female)**

East Africa subregion  
Sub-Saharan Africa region

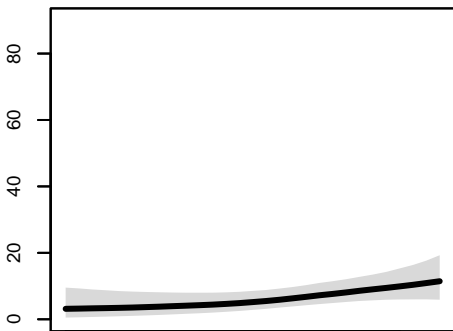

**Estonia (female)**

Eastern Europe subregion  
Central and Eastern Europe and Central Asia region

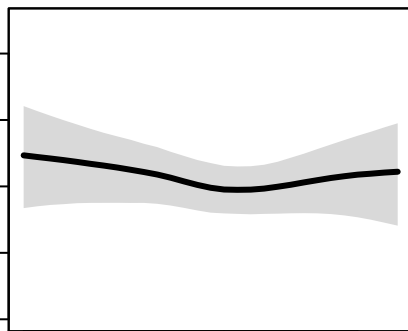

**Ethiopia (female)**

East Africa subregion  
Sub-Saharan Africa region

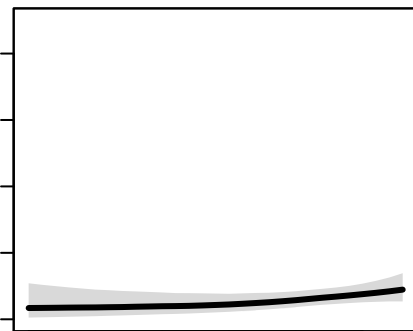

**Fiji (female)**

Oceania subregion  
East Asia and Pacific region

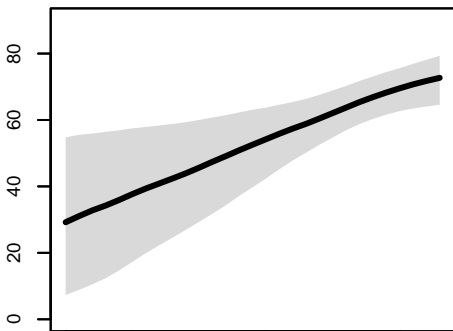

**Finland (female)**

Western Europe subregion  
High-income regions

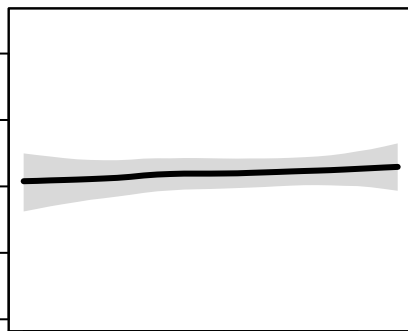

**France (female)**

Western Europe subregion  
High-income regions

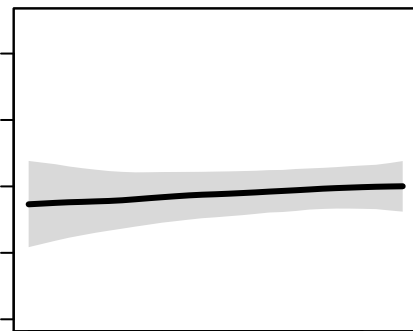

**French Polynesia (female)**

Oceania subregion  
East Asia and Pacific region

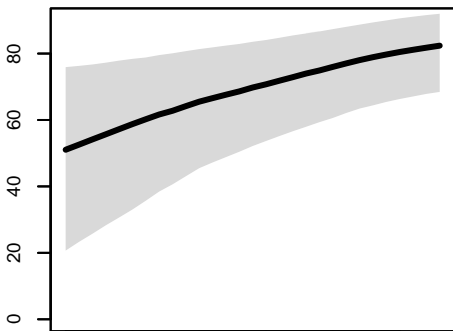

**Gabon (female)**

Central Africa subregion  
Sub-Saharan Africa region

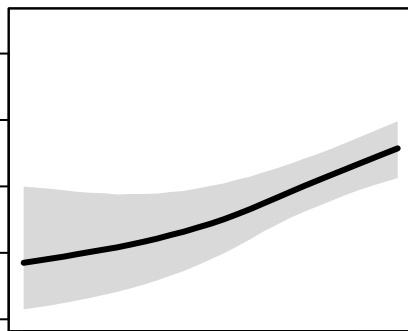

**Gambia (female)**

West Africa subregion  
Sub-Saharan Africa region

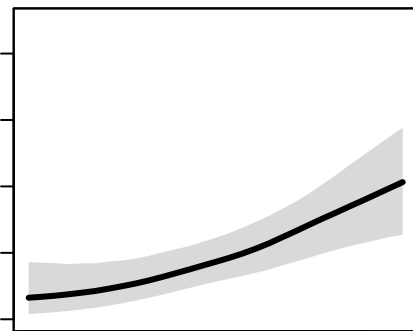

**Georgia (female)**

Central Asia subregion  
Central and Eastern Europe and Central Asia region

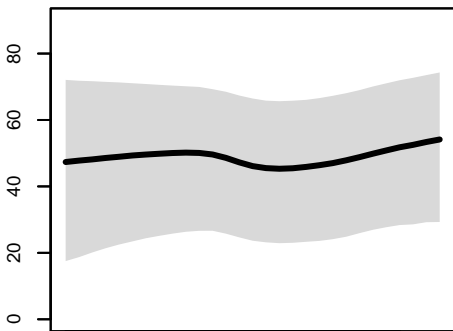

**Germany (female)**

Western Europe subregion  
High-income regions

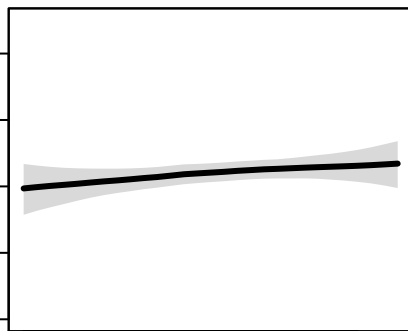

**Ghana (female)**

West Africa subregion  
Sub-Saharan Africa region

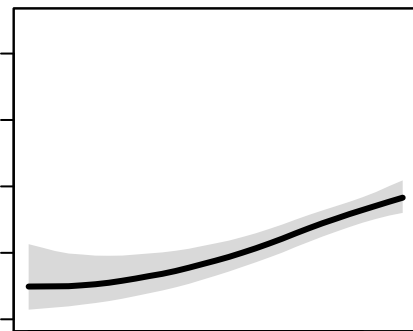

1980 1985 1990 1995 2000 2005

1980 1985 1990 1995 2000 2005

1980 1985 1990 1995 2000 2005

**Greece (female)**

Western Europe subregion  
High-income regions

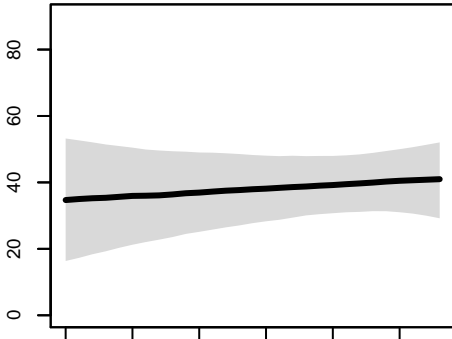

**Greenland (female)**

Western Europe subregion  
High-income regions

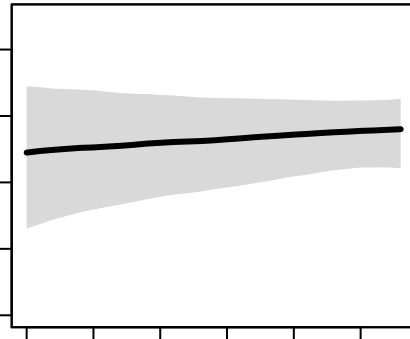

**Grenada (female)**

Caribbean subregion  
Latin America and Caribbean region

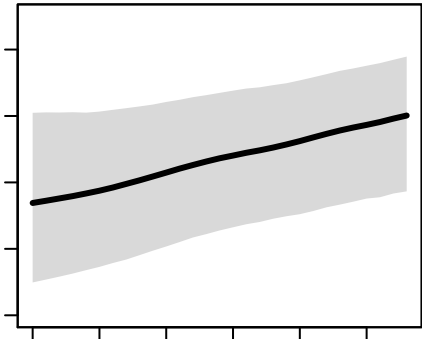

**Guatemala (female)**

Central Latin America subregion  
Latin America and Caribbean region

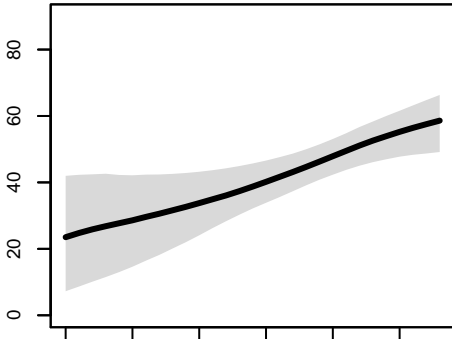

**Guinea (female)**

West Africa subregion  
Sub-Saharan Africa region

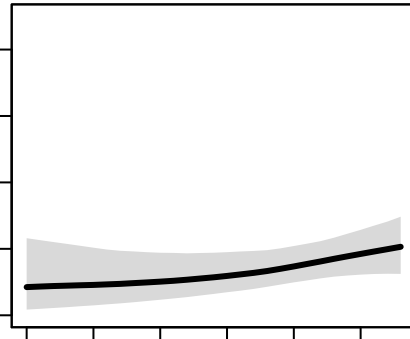

**Guinea-Bissau (female)**

West Africa subregion  
Sub-Saharan Africa region

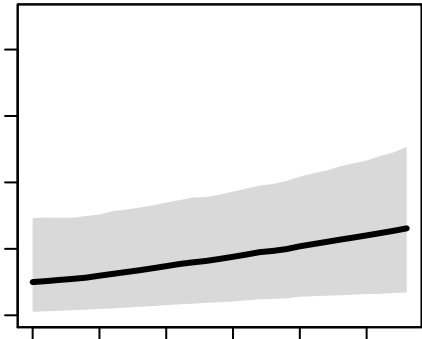

**Guyana (female)**

Caribbean subregion  
Latin America and Caribbean region

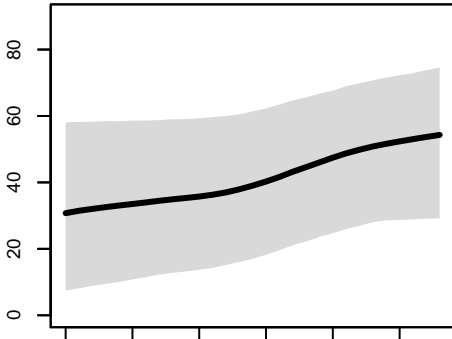

**Haiti (female)**

Caribbean subregion  
Latin America and Caribbean region

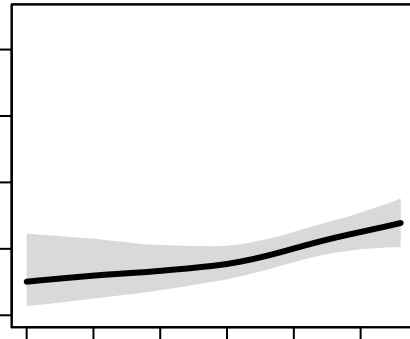

**Honduras (female)**

Central Latin America subregion  
Latin America and Caribbean region

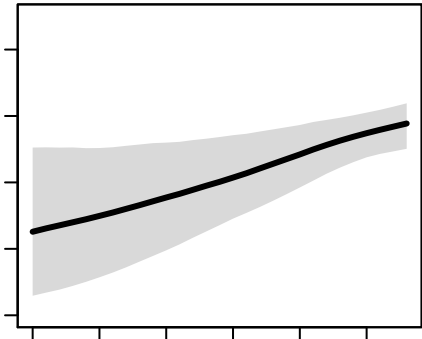

**Hungary (female)**

Central Europe subregion  
Central and Eastern Europe and Central Asia region

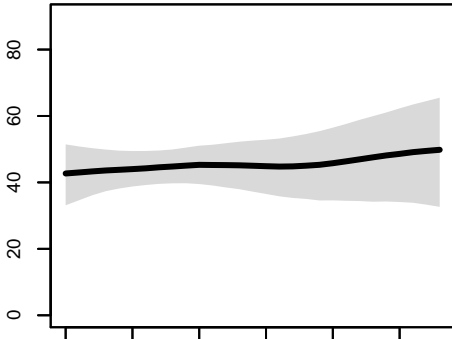

**Iceland (female)**

Western Europe subregion  
High-income regions

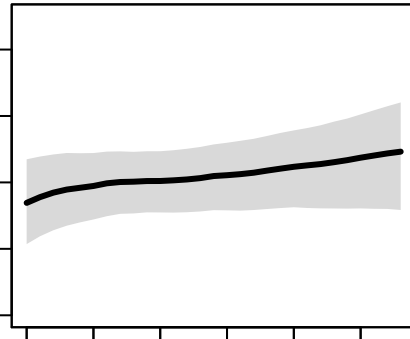

**India (female)**

South Asia subregion  
South Asia region

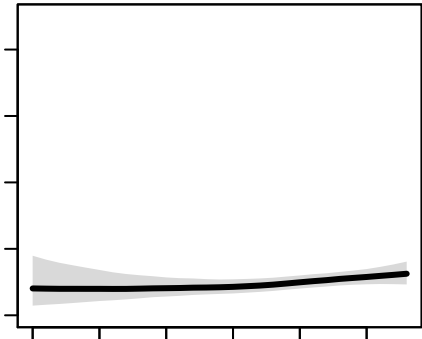

**Indonesia (female)**  
Southeast Asia subregion  
East Asia and Pacific region

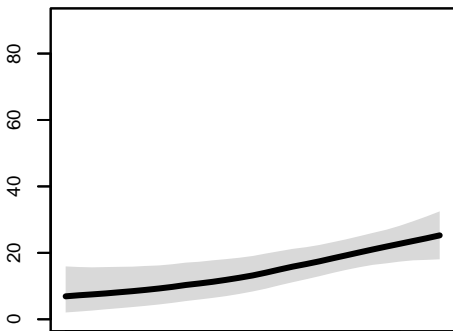

**Iran (Islamic Republic of) (female)**  
North Africa and Middle East subregion  
North Africa and Middle East region

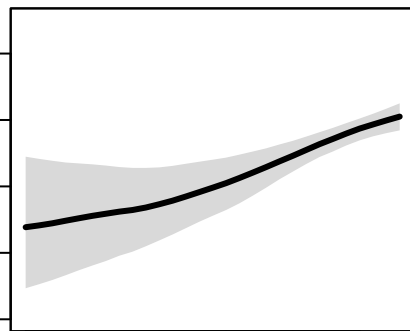

**Iraq (female)**  
North Africa and Middle East subregion  
North Africa and Middle East region

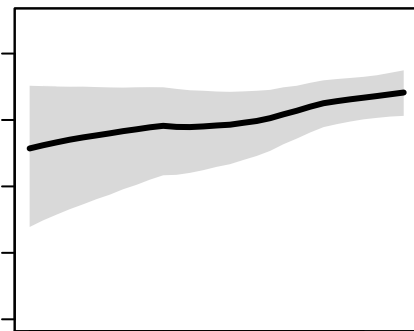

**Ireland (female)**  
Western Europe subregion  
High-income regions

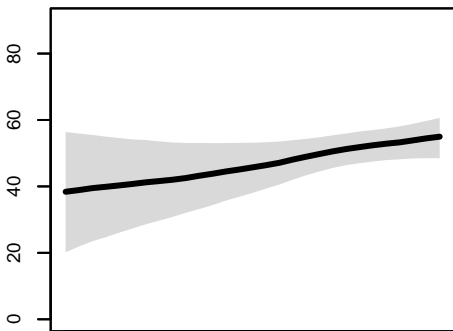

**Israel (female)**  
Western Europe subregion  
High-income regions

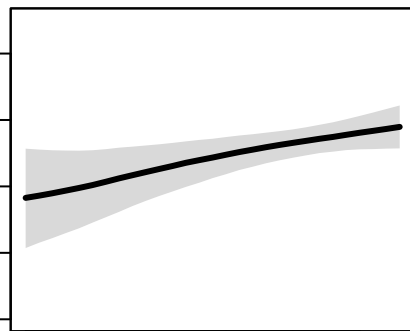

**Italy (female)**  
Western Europe subregion  
High-income regions

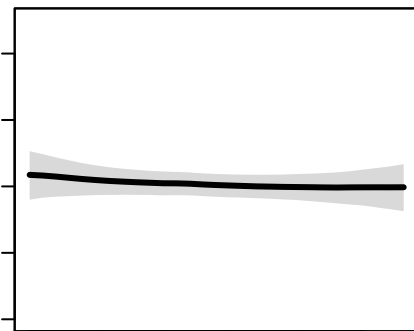

**Jamaica (female)**  
Caribbean subregion  
Latin America and Caribbean region

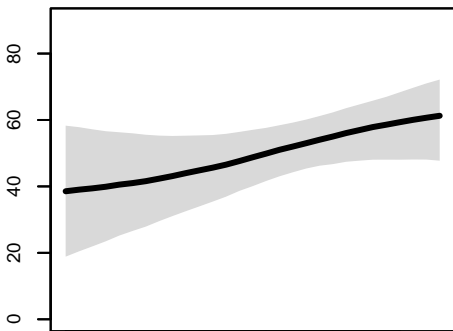

**Japan (female)**  
Asia-Pacific, high-income subregion  
High-income regions

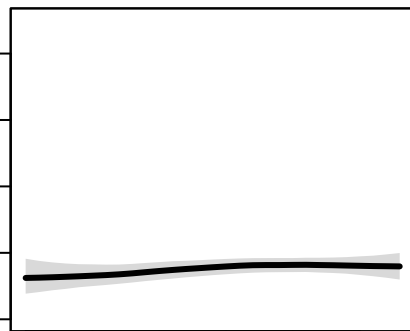

**Jordan (female)**  
North Africa and Middle East subregion  
North Africa and Middle East region

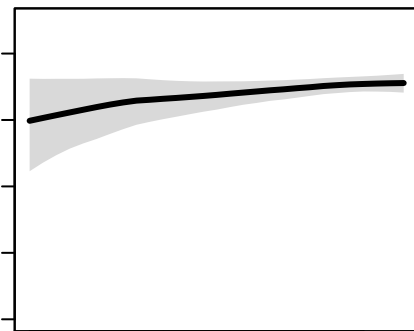

**Kazakhstan (female)**  
Central Asia subregion  
Central and Eastern Europe and Central Asia region

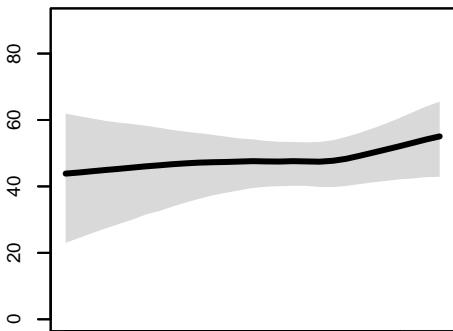

**Kenya (female)**  
East Africa subregion  
Sub-Saharan Africa region

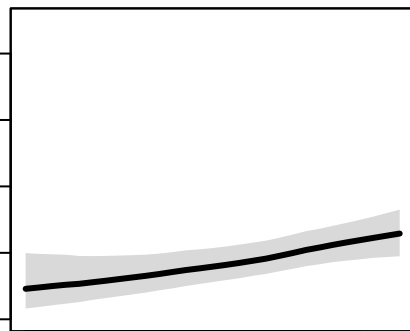

**Kiribati (female)**  
Oceania subregion  
East Asia and Pacific region

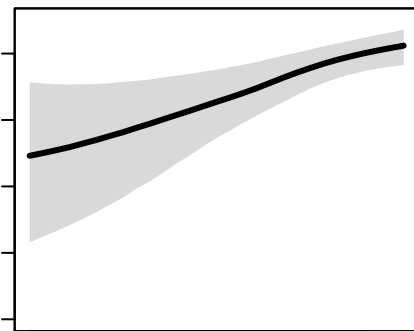



**Kuwait (female)**

North Africa and Middle East subregion  
North Africa and Middle East region

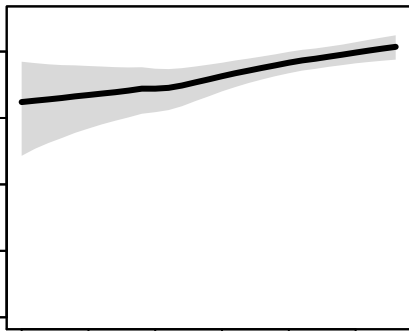

**Kyrgyzstan (female)**

Central Asia subregion  
Central and Eastern Europe and Central Asia region

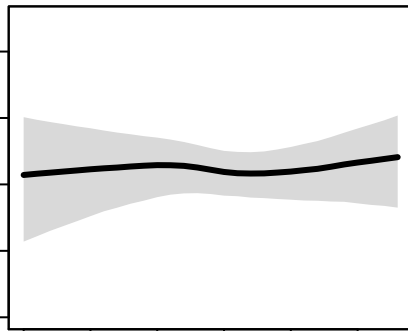

**Lao People's Democratic Republic (female)**

Southeast Asia subregion  
East Asia and Pacific region

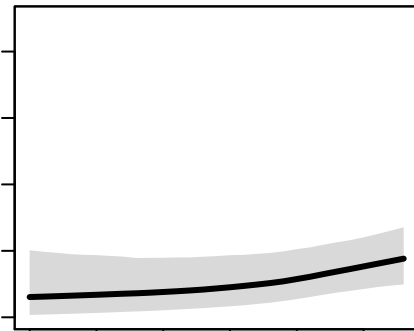

**Latvia (female)**

Eastern Europe subregion  
Central and Eastern Europe and Central Asia region

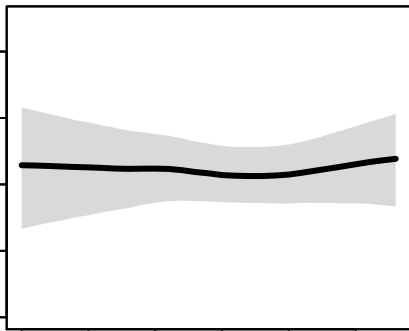

**Lebanon (female)**

North Africa and Middle East subregion  
North Africa and Middle East region

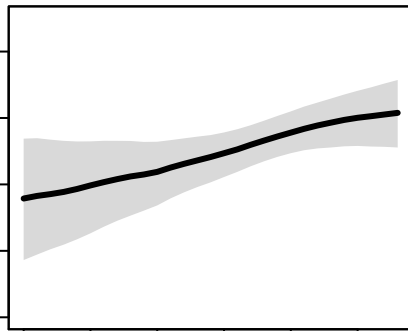

**Lesotho (female)**

Southern Africa subregion  
Sub-Saharan Africa region

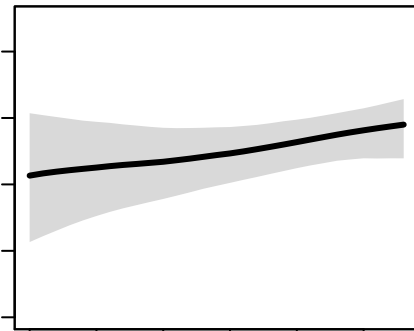

**Liberia (female)**

West Africa subregion  
Sub-Saharan Africa region

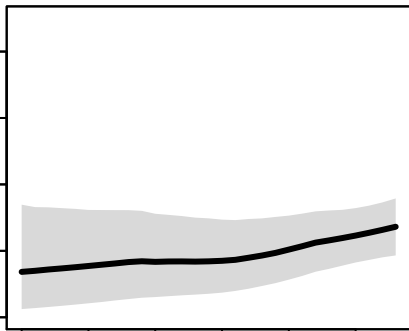

**Libyan Arab Jamahiriya (female)**

North Africa and Middle East subregion  
North Africa and Middle East region

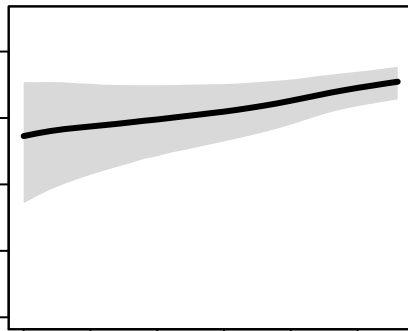

**Lithuania (female)**

Eastern Europe subregion  
Central and Eastern Europe and Central Asia region

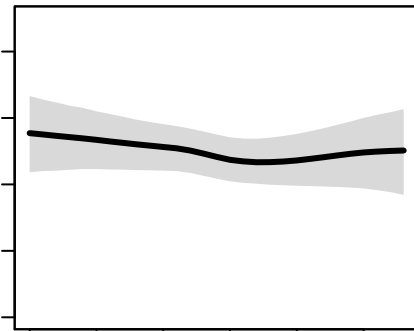

**Luxembourg (female)**

Western Europe subregion  
High-income regions

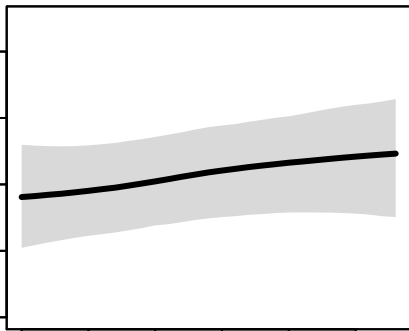

**Macedonia (Former Yugoslav Republic of) (female)**

Central Europe subregion  
Central and Eastern Europe and Central Asia region

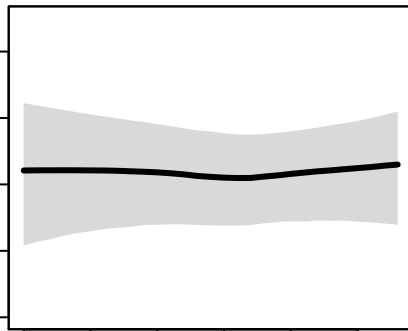

**Madagascar (female)**

East Africa subregion  
Sub-Saharan Africa region

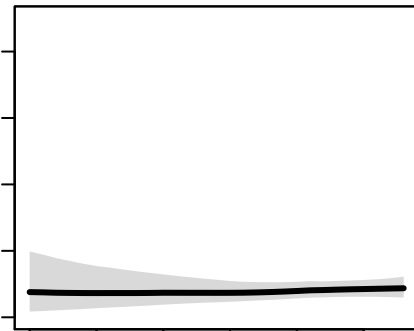

**Malawi (female)**  
East Africa subregion  
Sub-Saharan Africa region

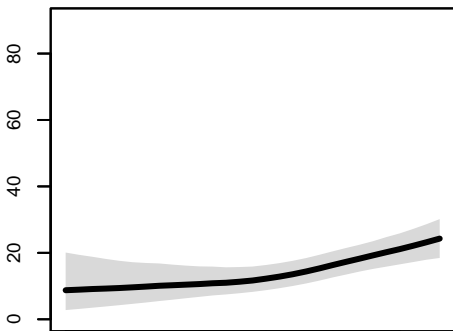

**Malaysia (female)**  
Southeast Asia subregion  
East Asia and Pacific region

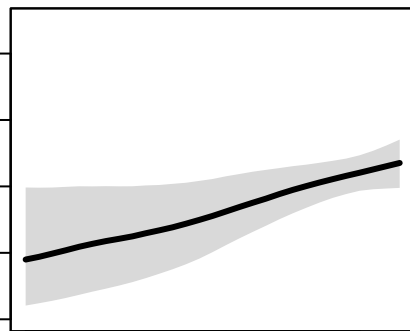

**Maldives (female)**  
Southeast Asia subregion  
East Asia and Pacific region

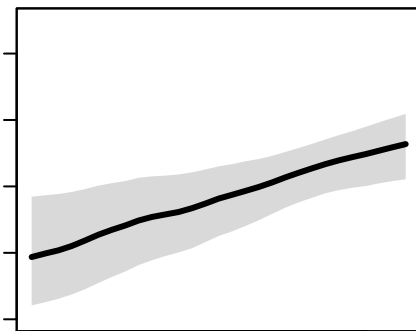

**Mali (female)**  
West Africa subregion  
Sub-Saharan Africa region

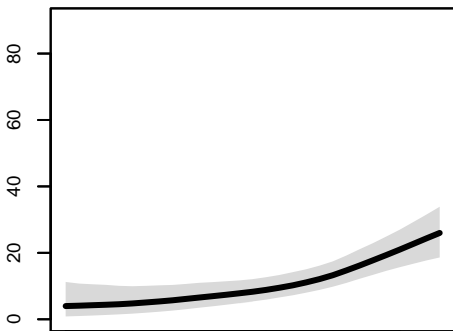

**Malta (female)**  
Western Europe subregion  
High-income regions

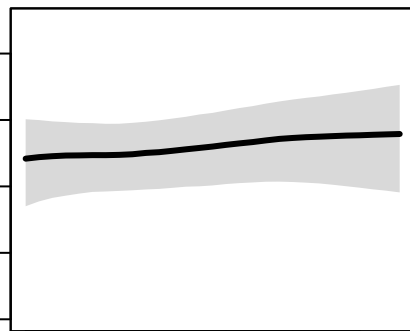

**Marshall Islands (female)**  
Oceania subregion  
East Asia and Pacific region

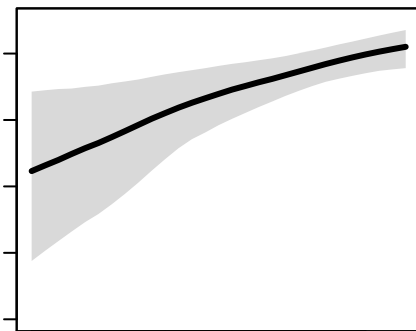

**Mauritania (female)**  
West Africa subregion  
Sub-Saharan Africa region

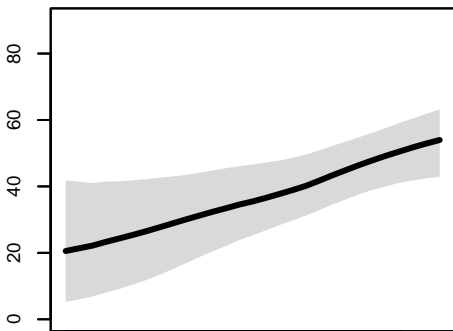

**Mauritius (female)**  
Southeast Asia subregion  
East Asia and Pacific region

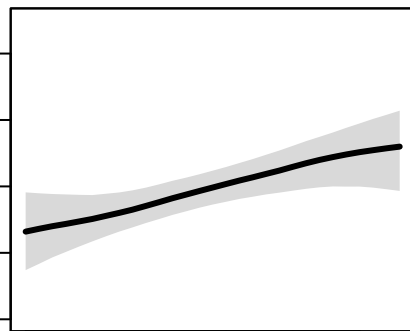

**Mexico (female)**  
Central Latin America subregion  
Latin America and Caribbean region

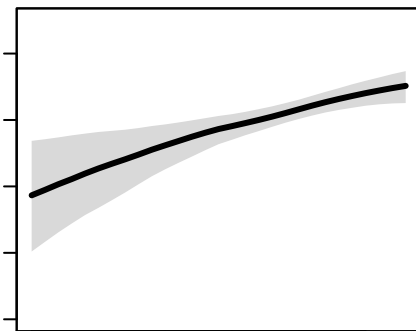

**Micronesia (Federated States of) (female)**  
Oceania subregion  
East Asia and Pacific region

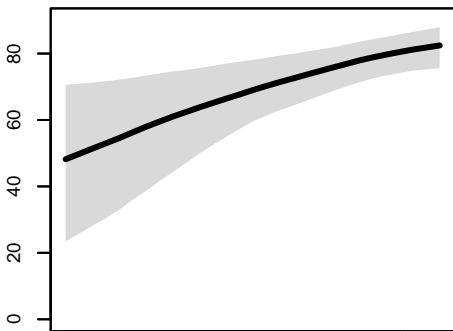

**Moldova (female)**  
Eastern Europe subregion  
Central and Eastern Europe and Central Asia region

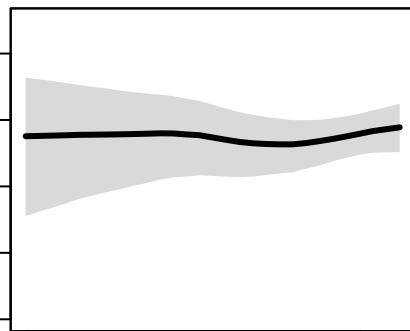

**Mongolia (female)**  
Central Asia subregion  
Central and Eastern Europe and Central Asia region

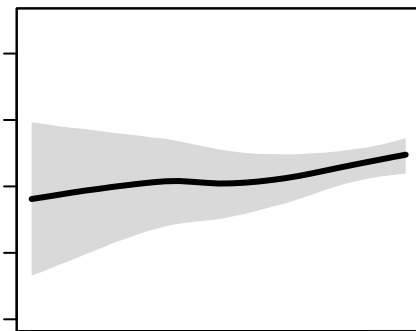

**Montenegro (female)**

Central Europe subregion

Central and Eastern Europe and Central Asia region

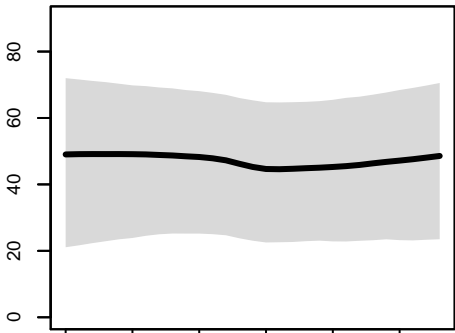

**Morocco (female)**

North Africa and Middle East subregion

North Africa and Middle East region

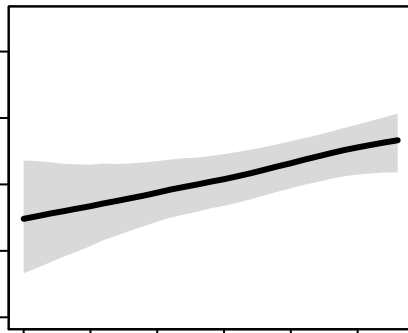

**Mozambique (female)**

East Africa subregion

Sub-Saharan Africa region

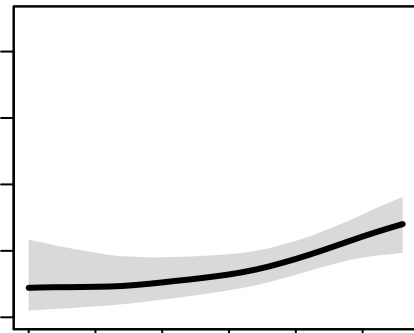

**Myanmar (female)**

Southeast Asia subregion

East Asia and Pacific region

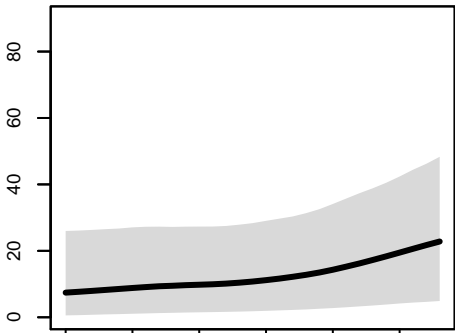

**Namibia (female)**

Southern Africa subregion

Sub-Saharan Africa region

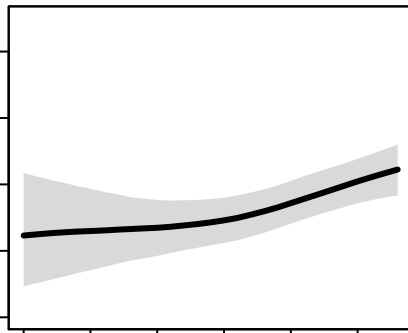

**Nauru (female)**

Oceania subregion

East Asia and Pacific region

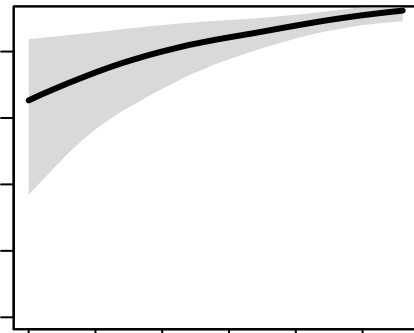

**Nepal (female)**

South Asia subregion

South Asia region

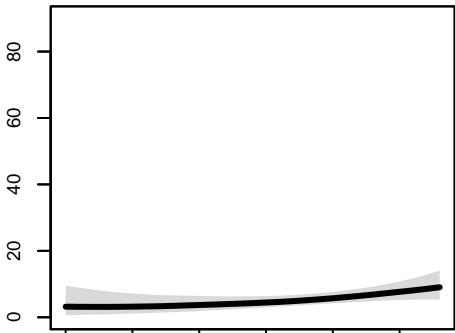

**Netherlands (female)**

Western Europe subregion

High-income regions

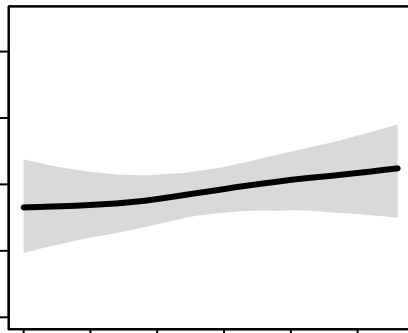

**Netherlands Antilles (female)**

Caribbean subregion

Latin America and Caribbean region

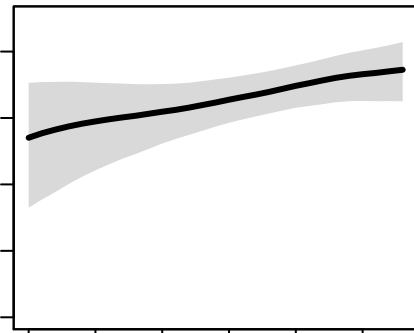

**New Zealand (female)**

Australasia subregion

High-income regions

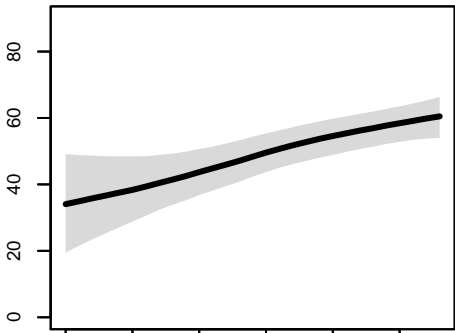

**Nicaragua (female)**

Central Latin America subregion

Latin America and Caribbean region

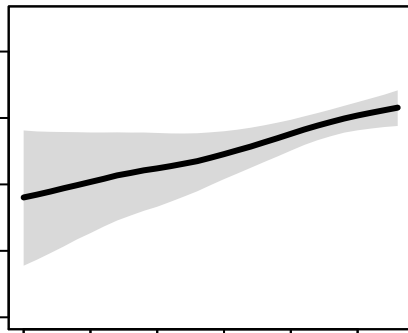

**Niger (female)**

West Africa subregion

Sub-Saharan Africa region

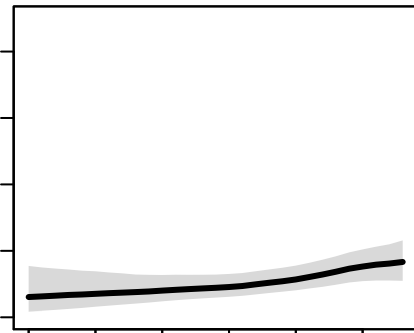

**Nigeria (female)**

West Africa subregion  
Sub-Saharan Africa region

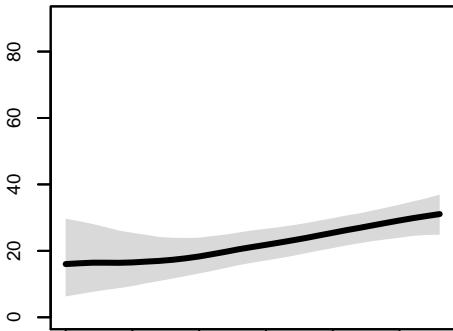

**Norway (female)**

Western Europe subregion  
High-income regions

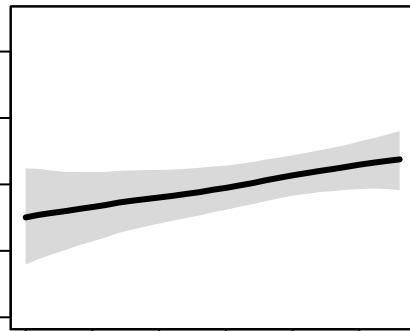

**Occupied Palestinian Territory (female)**

North Africa and Middle East subregion  
North Africa and Middle East region

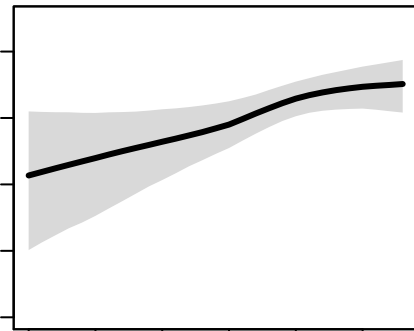

**Oman (female)**

North Africa and Middle East subregion  
North Africa and Middle East region

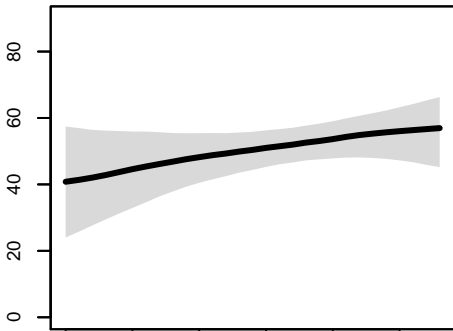

**Pakistan (female)**

South Asia subregion  
South Asia region

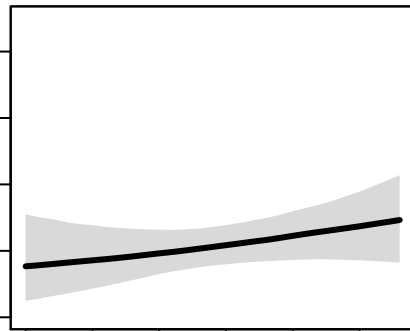

**Palau (female)**

Oceania subregion  
East Asia and Pacific region

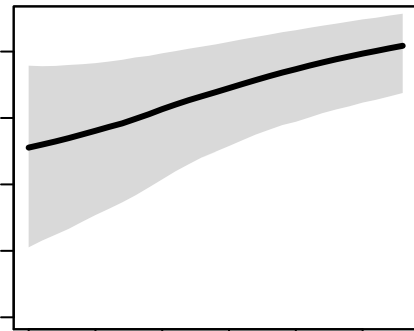

**Panama (female)**

Central Latin America subregion  
Latin America and Caribbean region

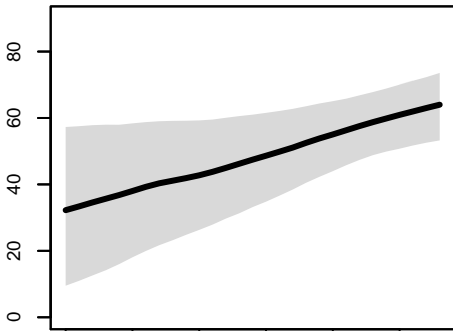

**Papua New Guinea (female)**

Oceania subregion  
East Asia and Pacific region

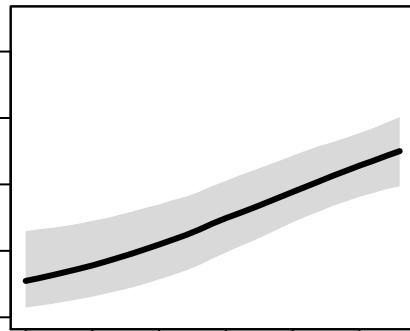

**Paraguay (female)**

Tropical Latin America subregion  
Latin America and Caribbean region

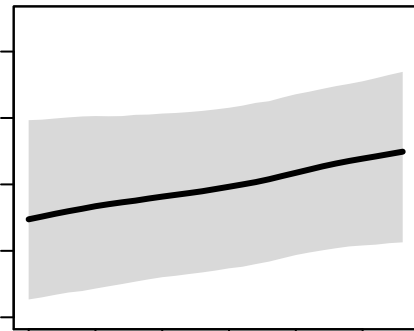

**Peru (female)**

Andean Latin America subregion  
Latin America and Caribbean region

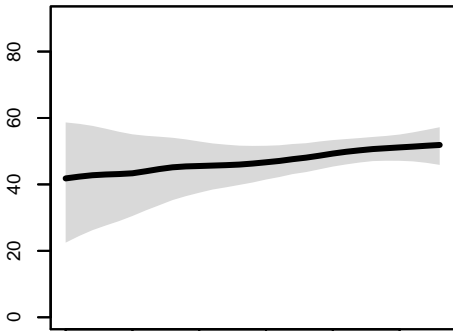

**Philippines (female)**

Southeast Asia subregion  
East Asia and Pacific region

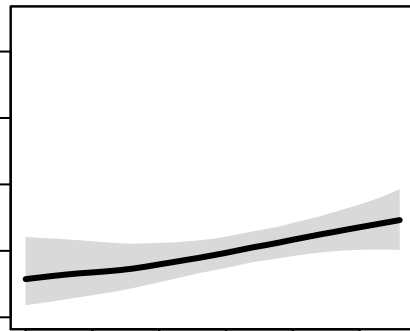

**Poland (female)**

Central Europe subregion  
Central and Eastern Europe and Central Asia region

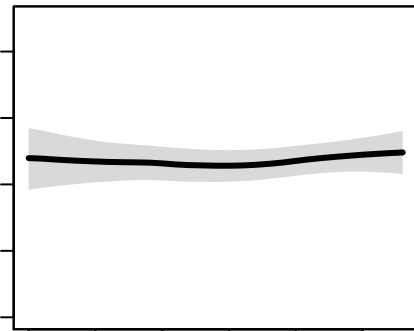

**Portugal (female)**  
Western Europe subregion  
High-income regions

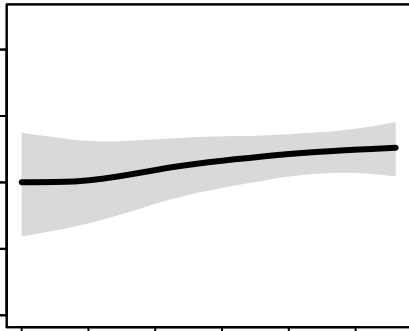

**Puerto Rico (female)**  
Caribbean subregion  
Latin America and Caribbean region

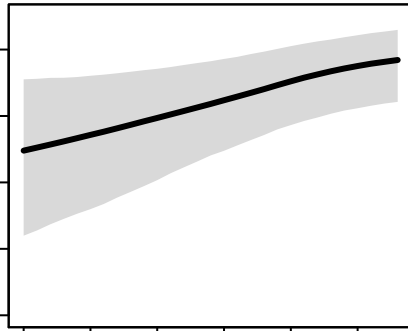

**Qatar (female)**  
North Africa and Middle East subregion  
North Africa and Middle East region

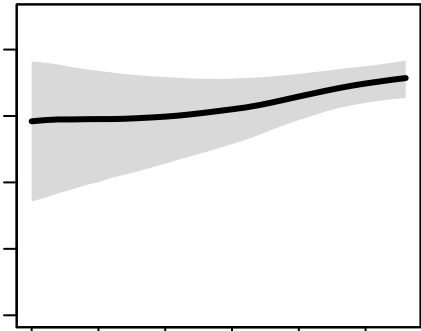

**Republic of Korea (female)**  
Asia-Pacific, high-income subregion  
High-income regions

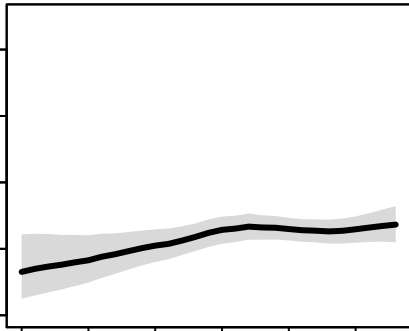

**Romania (female)**  
Central Europe subregion  
Central and Eastern Europe and Central Asia region

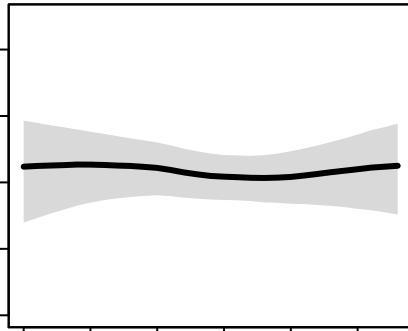

**Russian Federation (female)**  
Eastern Europe subregion  
Central and Eastern Europe and Central Asia region

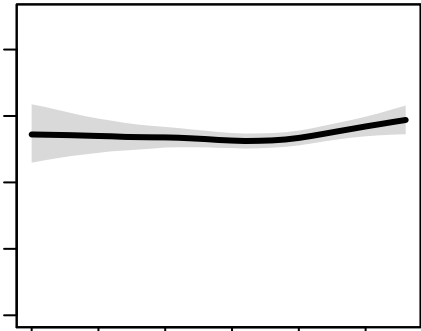

**Rwanda (female)**  
East Africa subregion  
Sub-Saharan Africa region

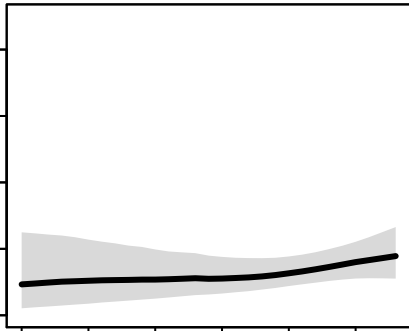

**Saint Kitts and Nevis (female)**  
Caribbean subregion  
Latin America and Caribbean region

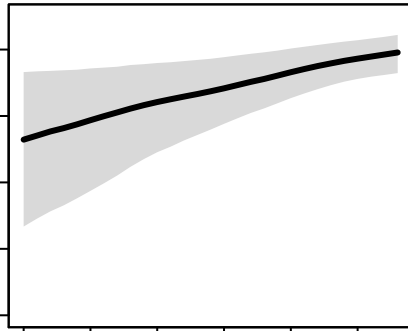

**Saint Lucia (female)**  
Caribbean subregion  
Latin America and Caribbean region

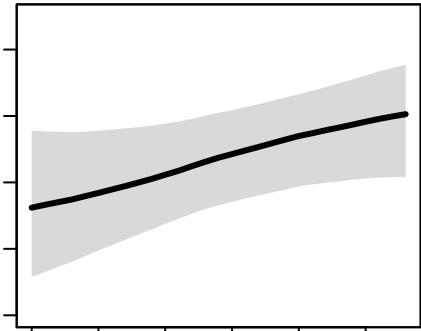

**Saint Vincent and the Grenadines (female)**  
Caribbean subregion  
Latin America and Caribbean region

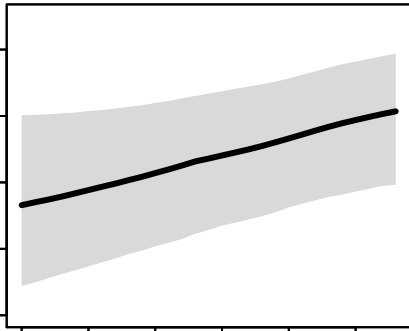

**Samoa (female)**  
Oceania subregion  
East Asia and Pacific region

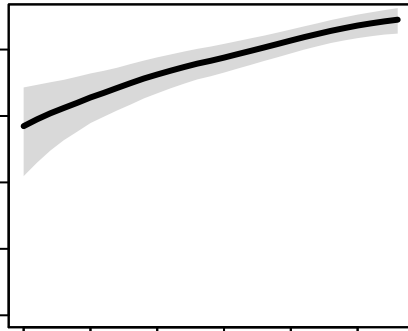

**Sao Tome and Principe (female)**  
West Africa subregion  
Sub-Saharan Africa region

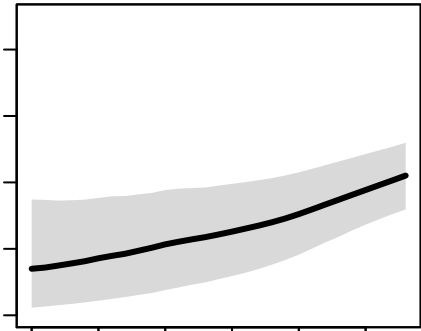

**Saudi Arabia (female)**

North Africa and Middle East subregion  
North Africa and Middle East region

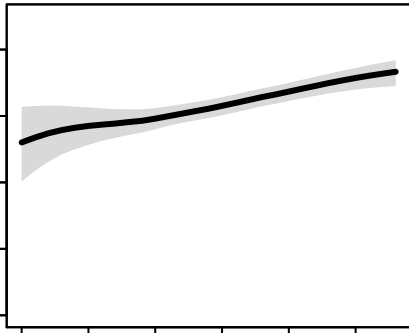

**Senegal (female)**

West Africa subregion  
Sub-Saharan Africa region

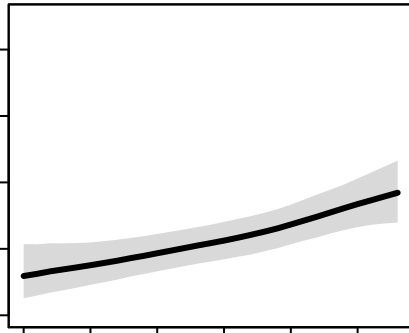

**Serbia (female)**

Central Europe subregion  
Central and Eastern Europe and Central Asia region

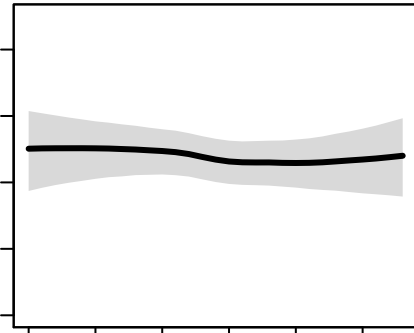

**Seychelles (female)**

Southeast Asia subregion  
East Asia and Pacific region

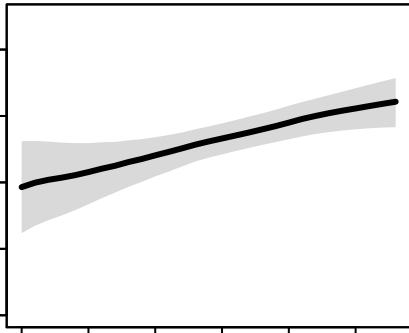

**Sierra Leone (female)**

West Africa subregion  
Sub-Saharan Africa region

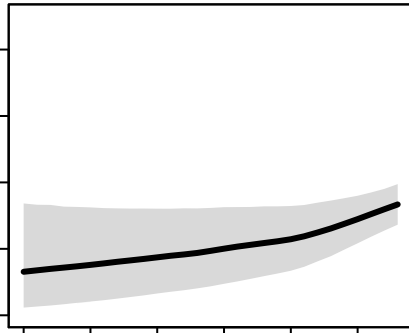

**Singapore (female)**

Asia-Pacific, high-income subregion  
High-income regions

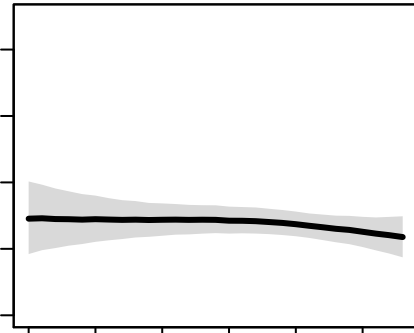

**Slovakia (female)**

Central Europe subregion  
Central and Eastern Europe and Central Asia region

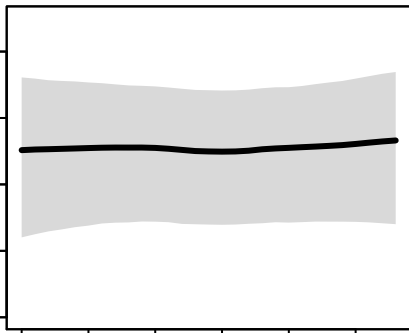

**Slovenia (female)**

Central Europe subregion  
Central and Eastern Europe and Central Asia region

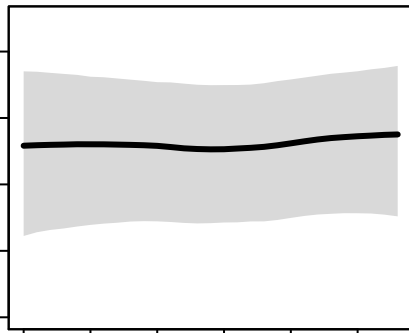

**Solomon Islands (female)**

Oceania subregion  
East Asia and Pacific region

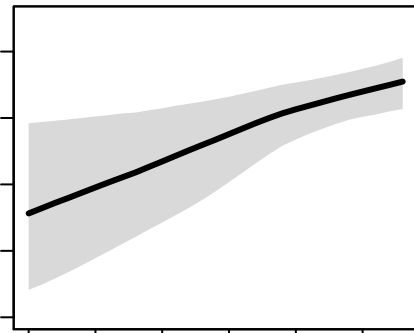

**Somalia (female)**

East Africa subregion  
Sub-Saharan Africa region

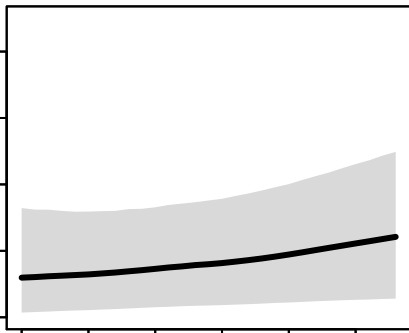

**South Africa (female)**

Southern Africa subregion  
Sub-Saharan Africa region

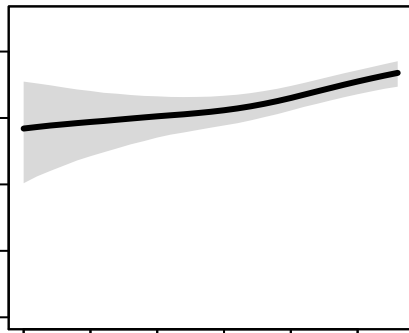

**Spain (female)**

Western Europe subregion  
High-income regions

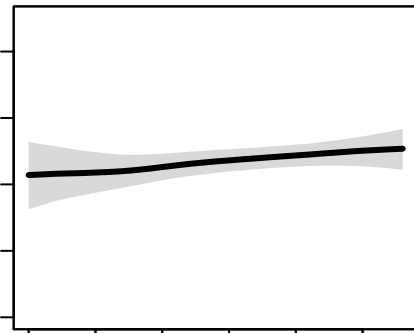

1980 1985 1990 1995 2000 2005

1980 1985 1990 1995 2000 2005

1980 1985 1990 1995 2000 2005

**Sri Lanka (female)**  
Southeast Asia subregion  
East Asia and Pacific region

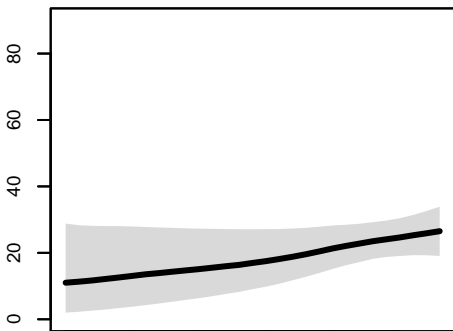

**Sudan (female)**  
East Africa subregion  
Sub-Saharan Africa region

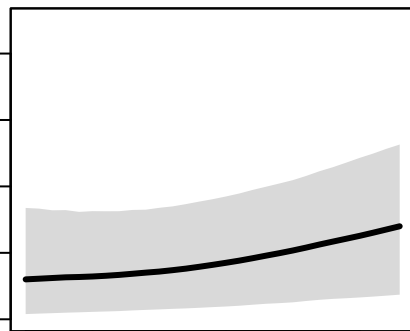

**Suriname (female)**  
Caribbean subregion  
Latin America and Caribbean region

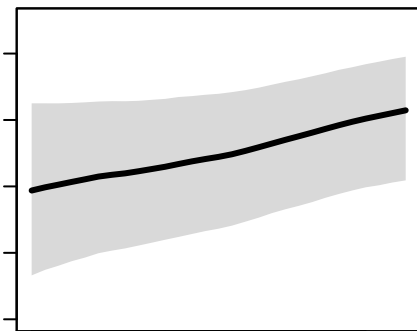

**Swaziland (female)**  
Southern Africa subregion  
Sub-Saharan Africa region

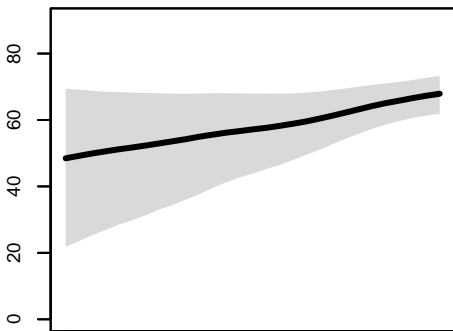

**Sweden (female)**  
Western Europe subregion  
High-income regions

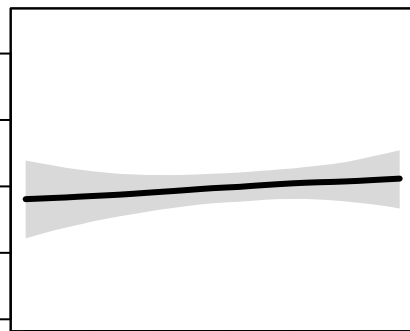

**Switzerland (female)**  
Western Europe subregion  
High-income regions

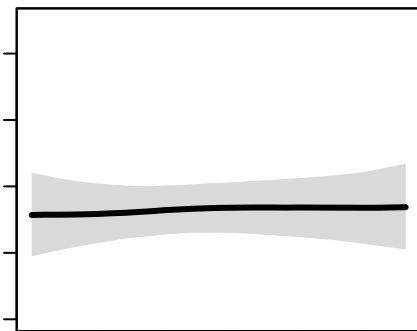

**Syrian Arab Republic (female)**  
North Africa and Middle East subregion  
North Africa and Middle East region

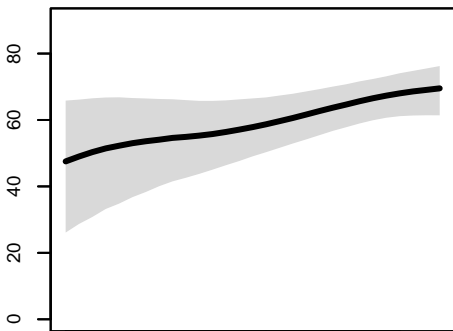

**Taiwan (female)**  
East Asia subregion  
East Asia and Pacific region

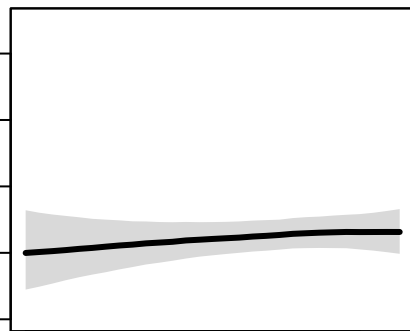

**Tajikistan (female)**  
Central Asia subregion  
Central and Eastern Europe and Central Asia region

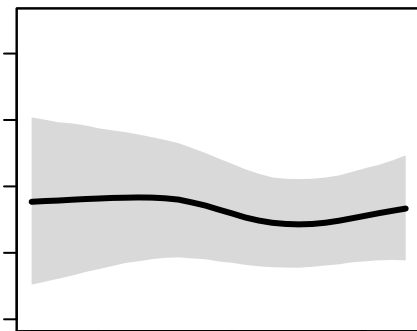

**Thailand (female)**  
Southeast Asia subregion  
East Asia and Pacific region

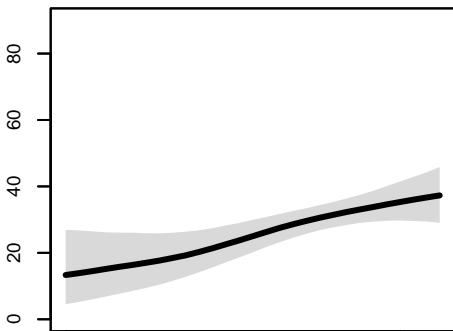

**Timor-Leste (female)**  
Southeast Asia subregion  
East Asia and Pacific region

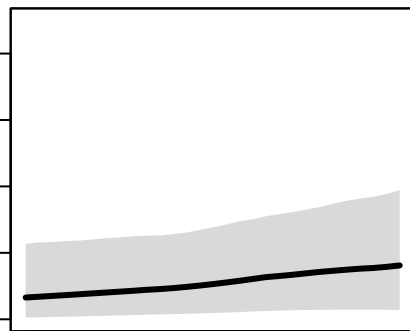

**Togo (female)**  
West Africa subregion  
Sub-Saharan Africa region

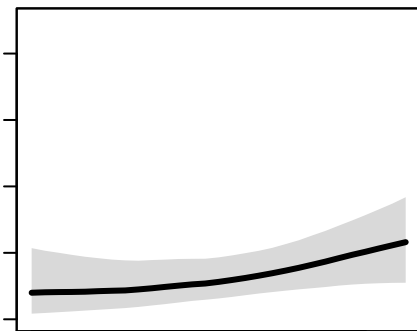

**Tonga (female)**  
Oceania subregion  
East Asia and Pacific region

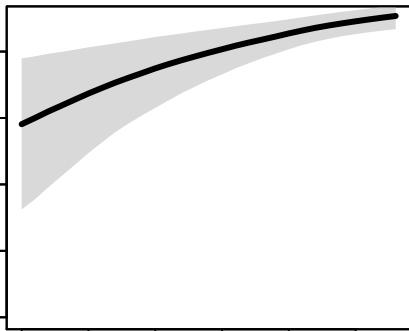

**Trinidad and Tobago (female)**  
Caribbean subregion  
Latin America and Caribbean region

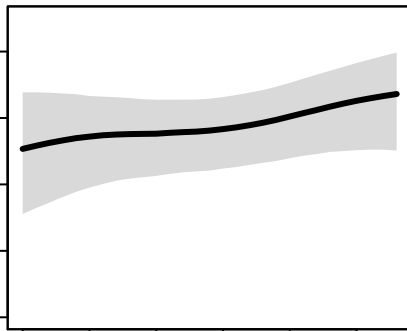

**Tunisia (female)**  
North Africa and Middle East subregion  
North Africa and Middle East region

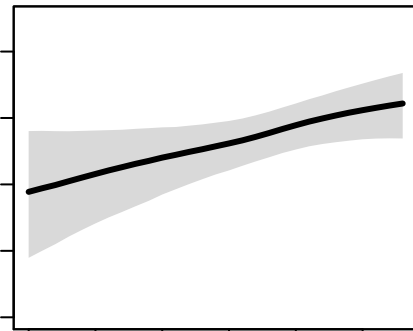

**Turkey (female)**  
North Africa and Middle East subregion  
North Africa and Middle East region

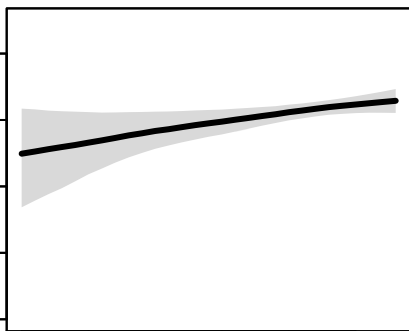

**Turkmenistan (female)**  
Central Asia subregion  
Central and Eastern Europe and Central Asia region

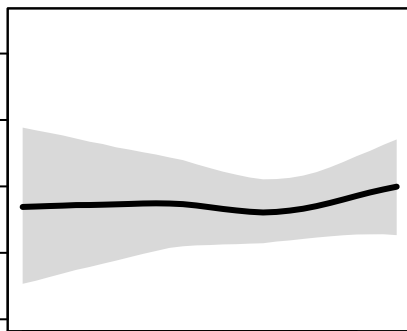

**Uganda (female)**  
East Africa subregion  
Sub-Saharan Africa region

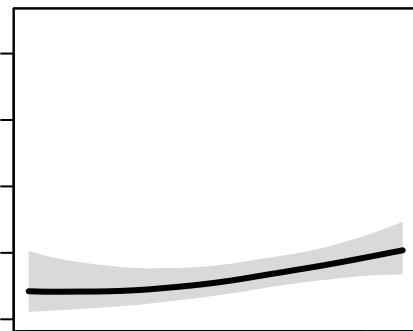

**Ukraine (female)**  
Eastern Europe subregion  
Central and Eastern Europe and Central Asia region

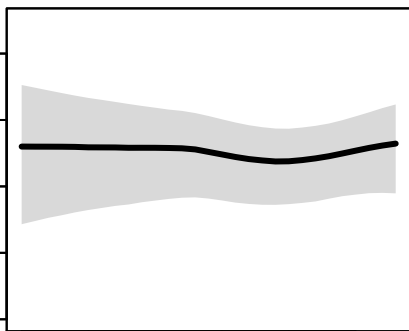

**United Arab Emirates (female)**  
North Africa and Middle East subregion  
North Africa and Middle East region

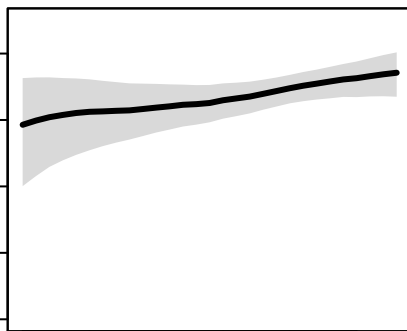

**United Kingdom (female)**  
Western Europe subregion  
High-income regions

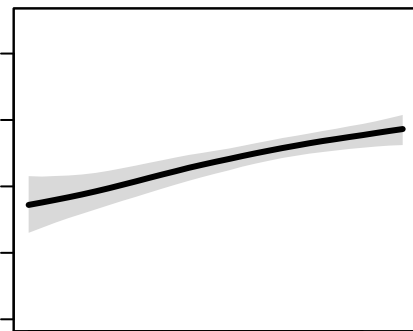

**United Republic of Tanzania (female)**  
East Africa subregion  
Sub-Saharan Africa region

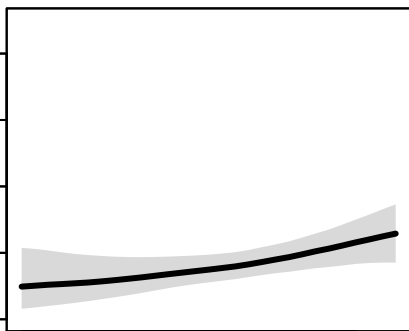

**United States of America (female)**  
North America, high-income subregion  
High-income regions

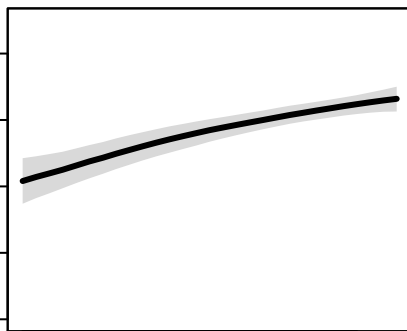

**Uruguay (female)**  
Southern Latin America subregion  
Latin America and Caribbean region

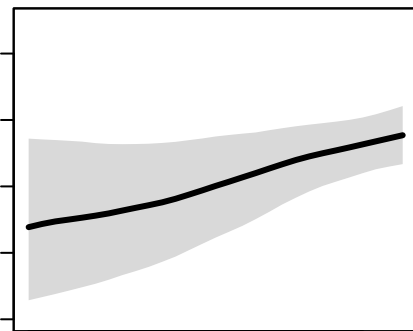



**Uzbekistan (female)**

Central Asia subregion

Central and Eastern Europe and Central Asia region

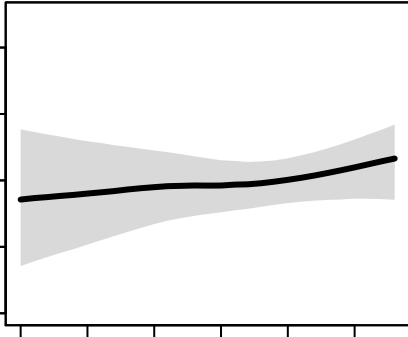

**Vanuatu (female)**

Oceania subregion

East Asia and Pacific region

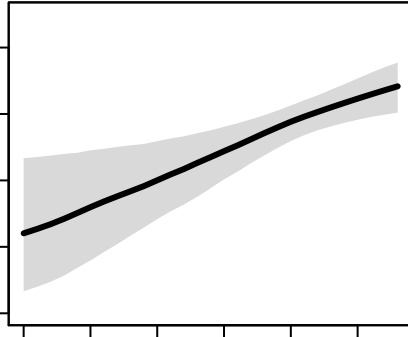

**Venezuela (Bolivarian Republic of) (female)**

Central Latin America subregion

Latin America and Caribbean region

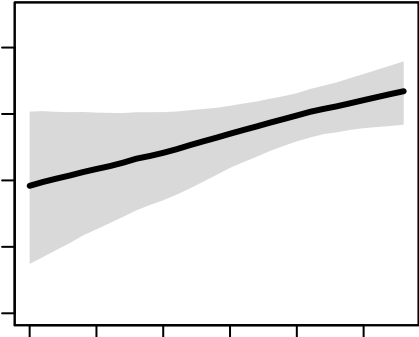

**Viet Nam (female)**

Southeast Asia subregion

East Asia and Pacific region

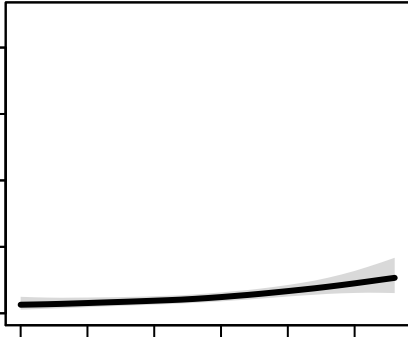

**Yemen (female)**

North Africa and Middle East subregion

North Africa and Middle East region

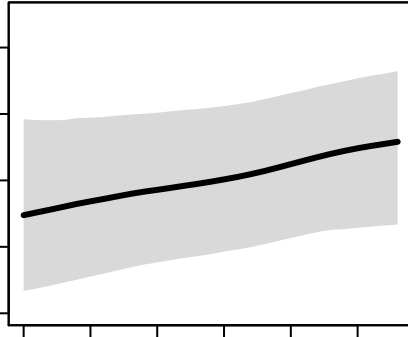

**Zambia (female)**

East Africa subregion

Sub-Saharan Africa region

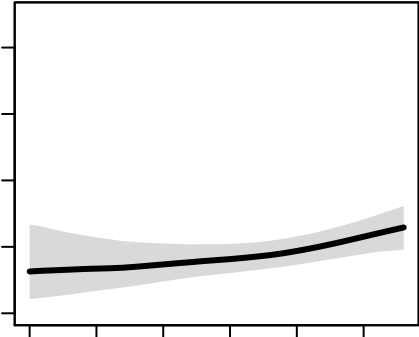

**Zimbabwe (female)**

Southern Africa subregion

Sub-Saharan Africa region

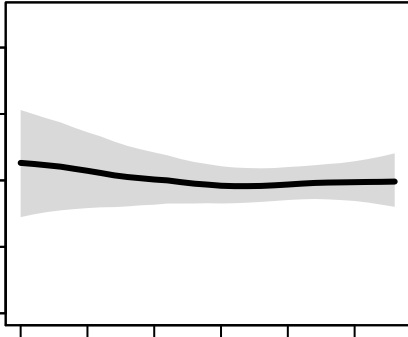

**Afghanistan (male)**

South Asia subregion  
South Asia region

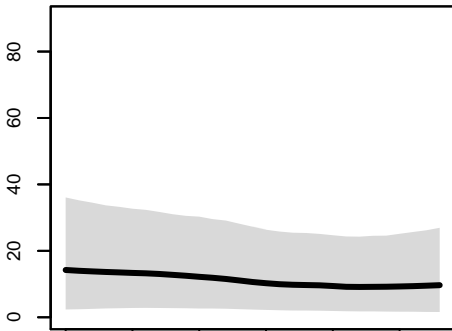

**Albania (male)**

Central Europe subregion  
Central and Eastern Europe and Central Asia region

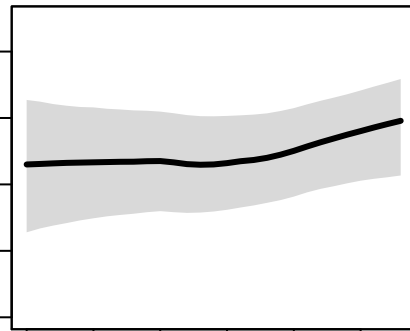

**Algeria (male)**

North Africa and Middle East subregion  
North Africa and Middle East region

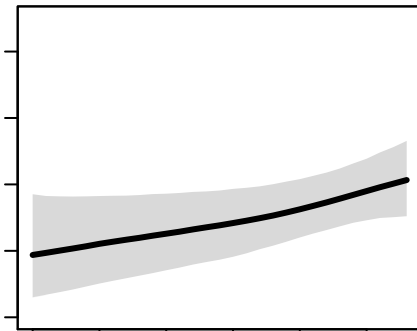

**Andorra (male)**

Western Europe subregion  
High-income regions

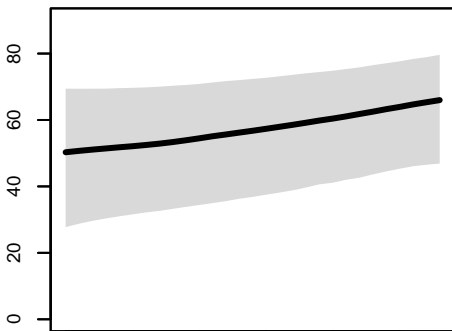

**Angola (male)**

Central Africa subregion  
Sub-Saharan Africa region

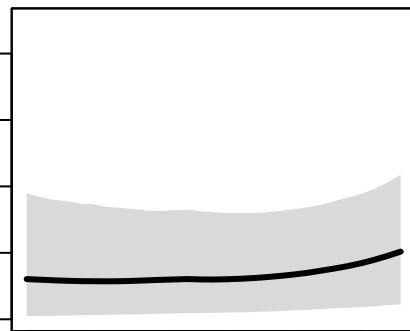

**Antigua and Barbuda (male)**

Caribbean subregion  
Latin America and Caribbean region

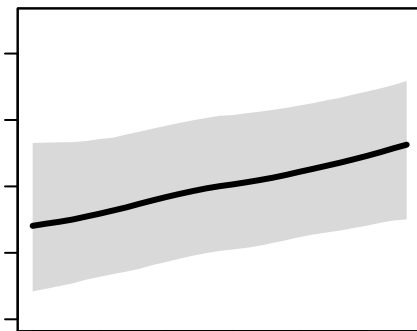

**Argentina (male)**

Southern Latin America subregion  
Latin America and Caribbean region

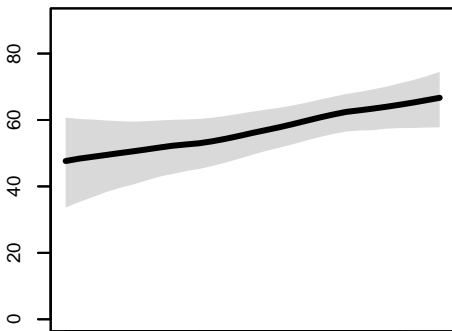

**Armenia (male)**

Central Asia subregion  
Central and Eastern Europe and Central Asia region

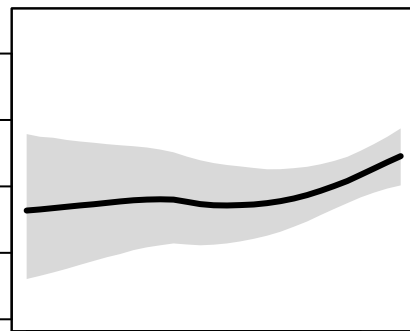

**Australia (male)**

Australasia subregion  
High-income regions

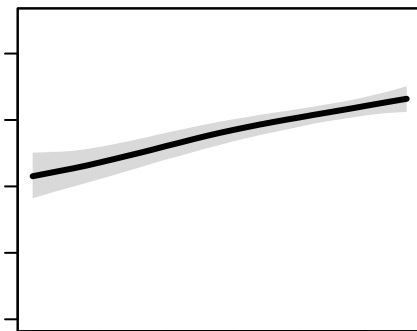

**Austria (male)**

Western Europe subregion  
High-income regions

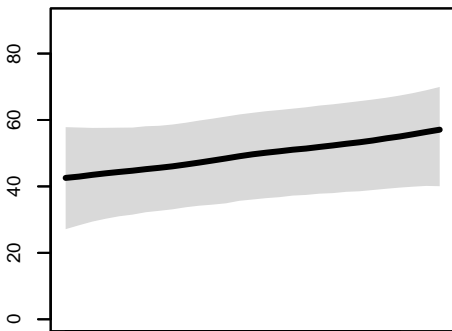

**Azerbaijan (male)**

Central Asia subregion  
Central and Eastern Europe and Central Asia region

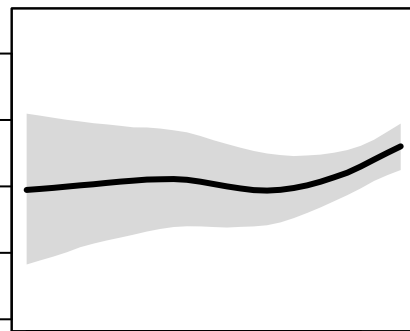

**Bahamas (male)**

Caribbean subregion  
Latin America and Caribbean region

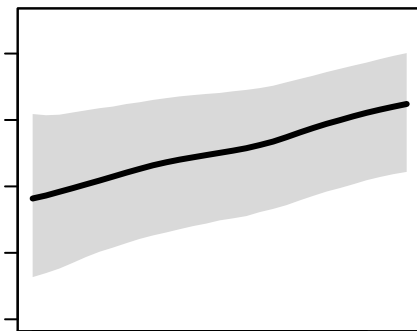

**Bahrain (male)**

North Africa and Middle East subregion  
North Africa and Middle East region

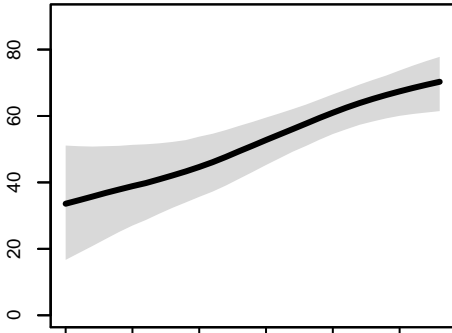**Bangladesh (male)**

South Asia subregion  
South Asia region

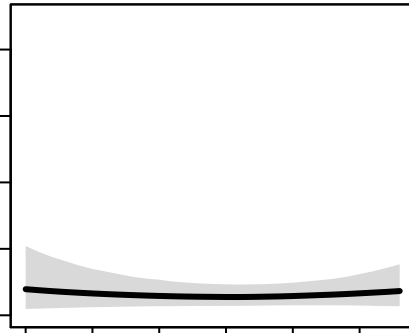**Barbados (male)**

Caribbean subregion  
Latin America and Caribbean region

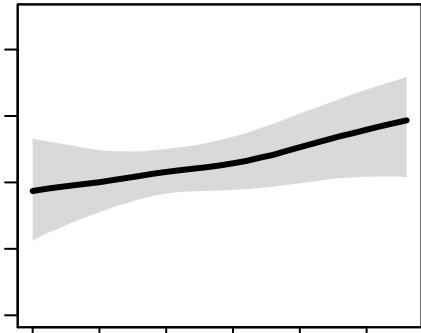**Belarus (male)**

Eastern Europe subregion  
Central and Eastern Europe and Central Asia region

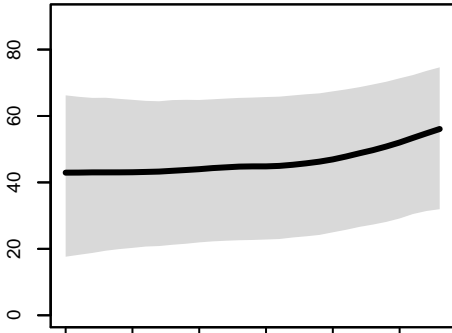**Belgium (male)**

Western Europe subregion  
High-income regions

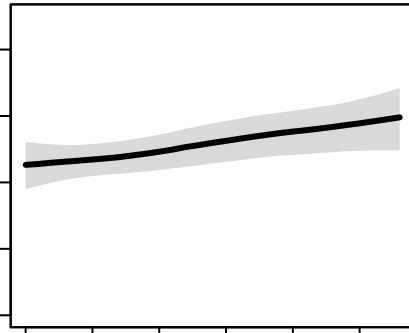**Belize (male)**

Caribbean subregion  
Latin America and Caribbean region

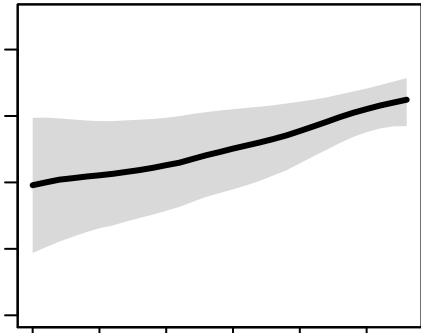**Benin (male)**

West Africa subregion  
Sub-Saharan Africa region

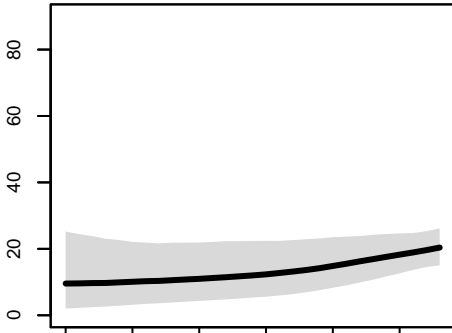**Bermuda (male)**

Caribbean subregion  
Latin America and Caribbean region

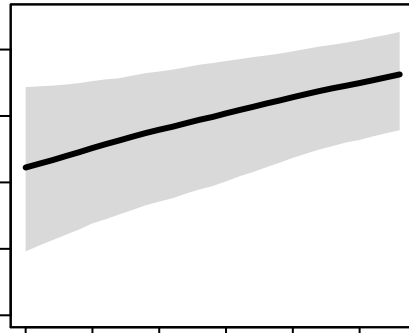**Bhutan (male)**

South Asia subregion  
South Asia region

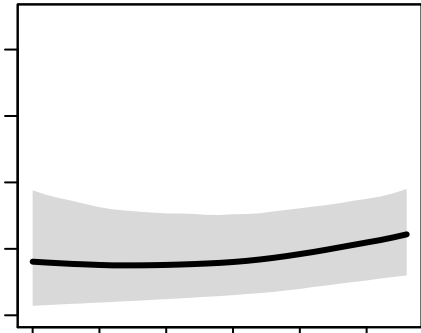**Bolivia (male)**

Andean Latin America subregion  
Latin America and Caribbean region

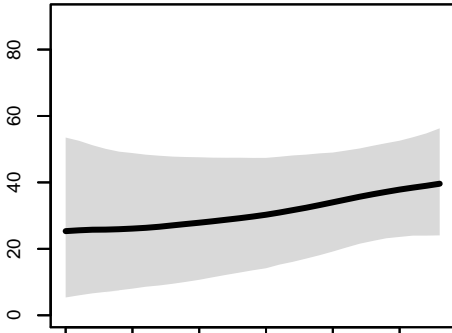**Bosnia and Herzegovina (male)**

Central Europe subregion  
Central and Eastern Europe and Central Asia region

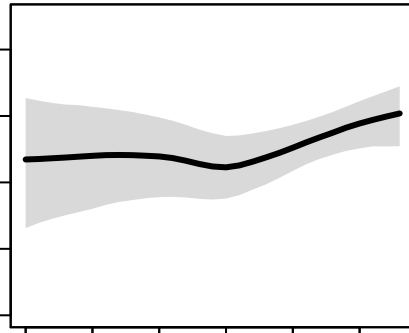**Botswana (male)**

Southern Africa subregion  
Sub-Saharan Africa region

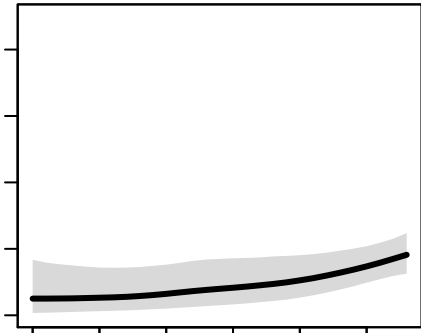

**Brazil (male)**  
Tropical Latin America subregion  
Latin America and Caribbean region

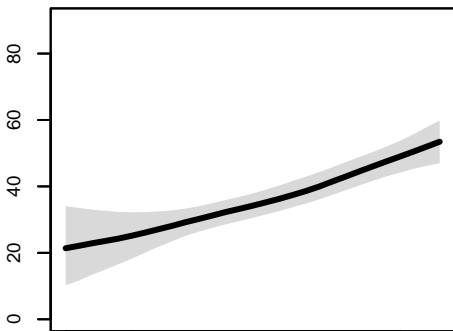

**British Virgin Islands (male)**  
Caribbean subregion  
Latin America and Caribbean region

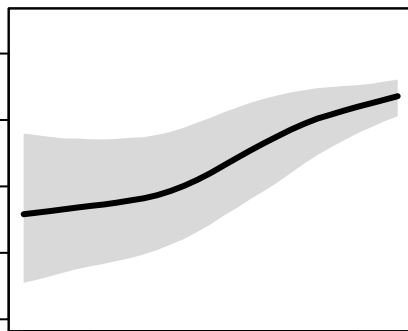

**Brunei Darussalam (male)**  
Asia-Pacific, high-income subregion  
High-income regions

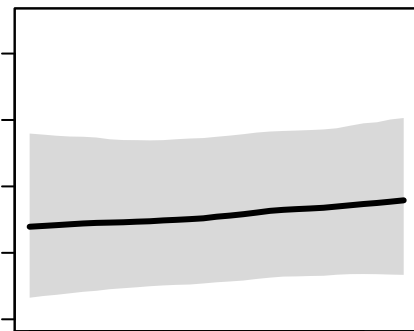

**Bulgaria (male)**  
Central Europe subregion  
Central and Eastern Europe and Central Asia region

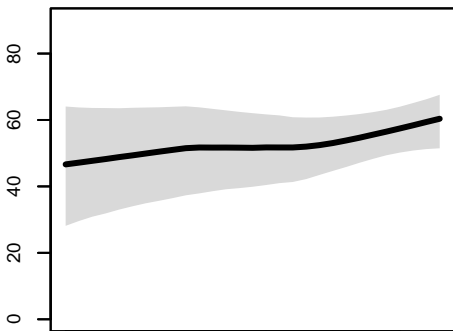

**Burkina Faso (male)**  
West Africa subregion  
Sub-Saharan Africa region

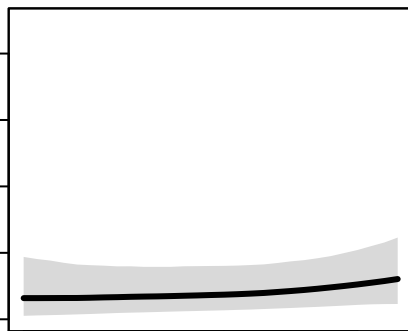

**Burundi (male)**  
East Africa subregion  
Sub-Saharan Africa region

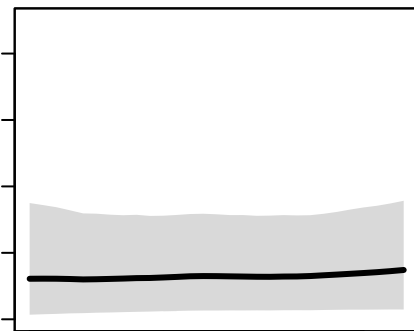

**Cambodia (male)**  
Southeast Asia subregion  
East Asia and Pacific region

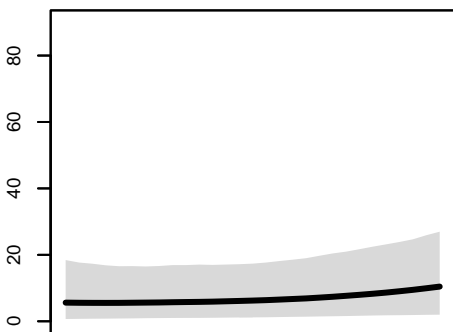

**Cameroon (male)**  
West Africa subregion  
Sub-Saharan Africa region

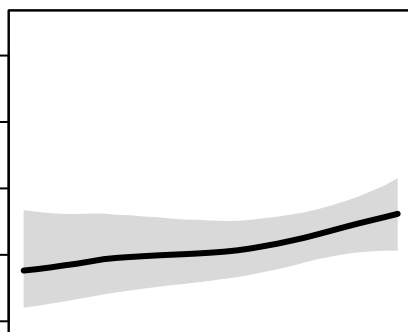

**Canada (male)**  
North America, high-income subregion  
High-income regions

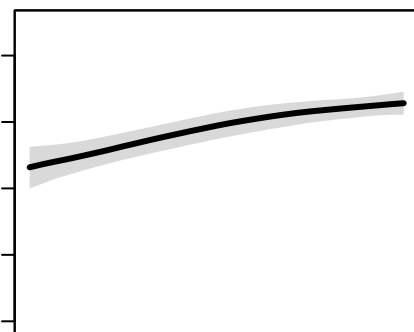

**Cape Verde (male)**  
West Africa subregion  
Sub-Saharan Africa region

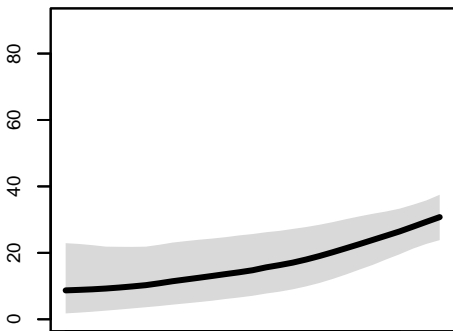

**Central African Republic (male)**  
Central Africa subregion  
Sub-Saharan Africa region

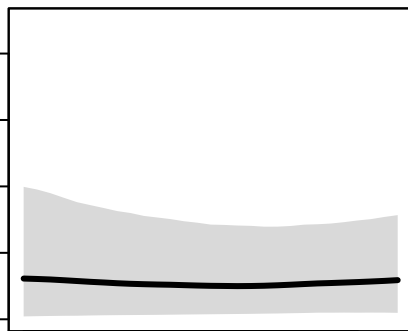

**Chad (male)**  
West Africa subregion  
Sub-Saharan Africa region

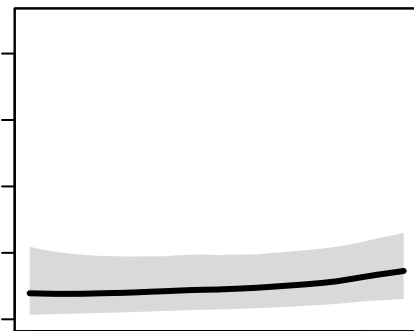

**Chile (male)**Southern Latin America subregion  
Latin America and Caribbean region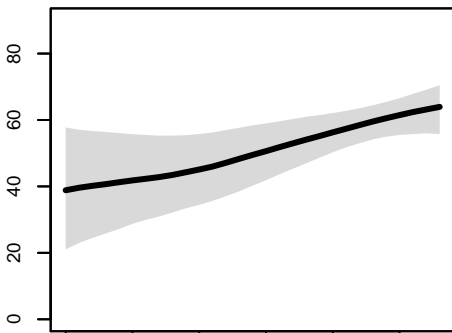**China (male)**East Asia subregion  
East Asia and Pacific region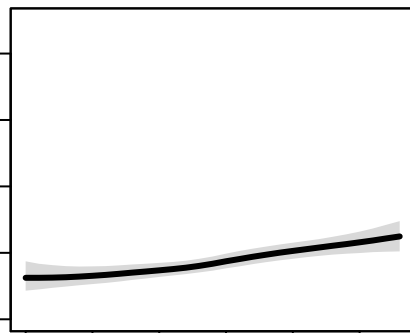**China (Hong Kong SAR) (male)**East Asia subregion  
East Asia and Pacific region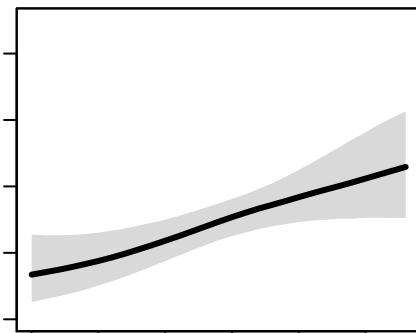**China (Macao SAR) (male)**East Asia subregion  
East Asia and Pacific region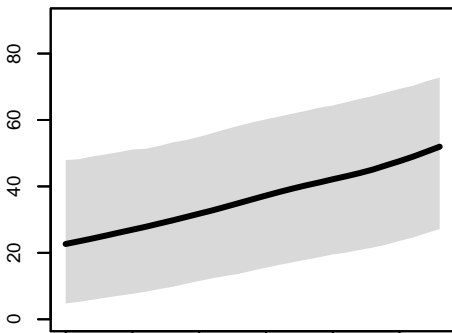**Colombia (male)**Central Latin America subregion  
Latin America and Caribbean region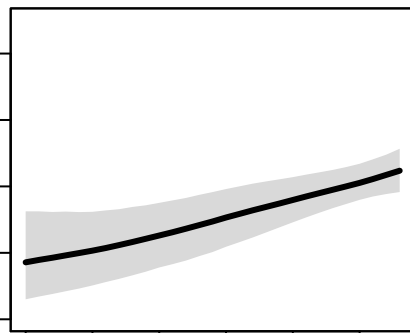**Comoros (male)**East Africa subregion  
Sub-Saharan Africa region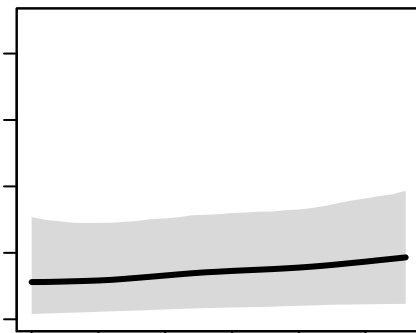**Congo (male)**Central Africa subregion  
Sub-Saharan Africa region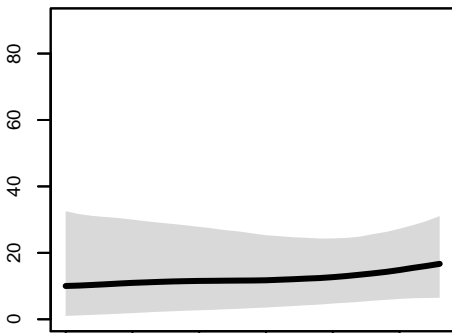**Cook Islands (male)**Oceania subregion  
East Asia and Pacific region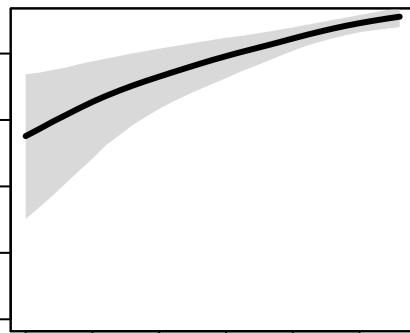**Costa Rica (male)**Central Latin America subregion  
Latin America and Caribbean region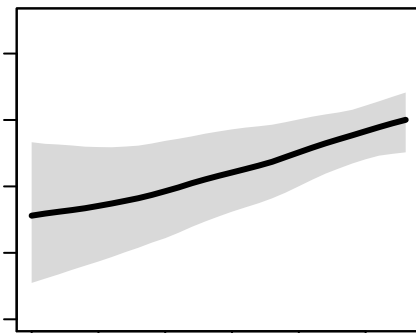**Cote d'Ivoire (male)**West Africa subregion  
Sub-Saharan Africa region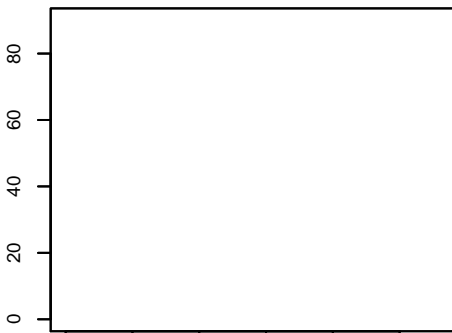**Croatia (male)**Central Europe subregion  
Central and Eastern Europe and Central Asia region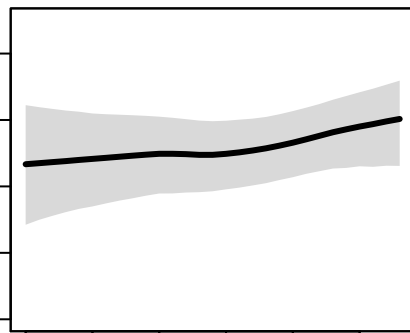**Cuba (male)**Caribbean subregion  
Latin America and Caribbean region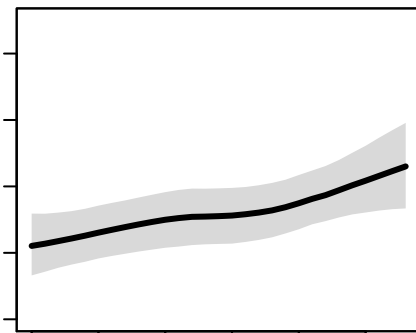

1980 1985 1990 1995 2000 2005

1980 1985 1990 1995 2000 2005

1980 1985 1990 1995 2000 2005

**Cyprus (male)**

Western Europe subregion  
High-income regions

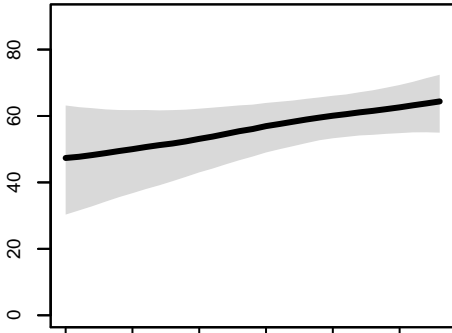

**Czech Republic (male)**

Central Europe subregion  
Central and Eastern Europe and Central Asia region

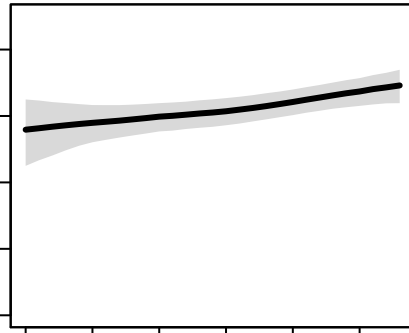

**Democratic People's Republic of Korea (male)**

East Asia subregion  
East Asia and Pacific region

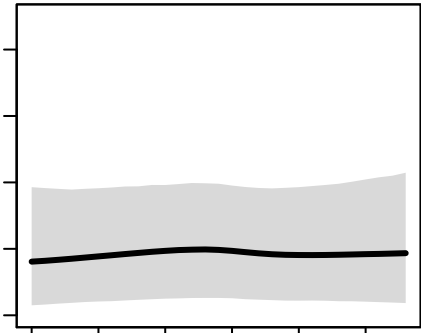

**Democratic Republic of the Congo (male)**

Central Africa subregion  
Sub-Saharan Africa region

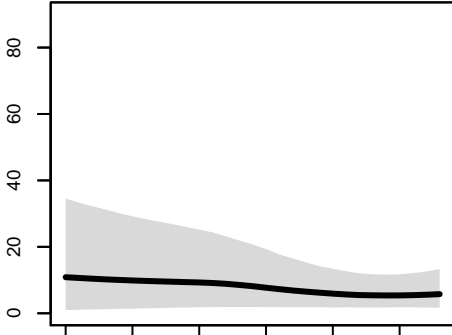

**Denmark (male)**

Western Europe subregion  
High-income regions

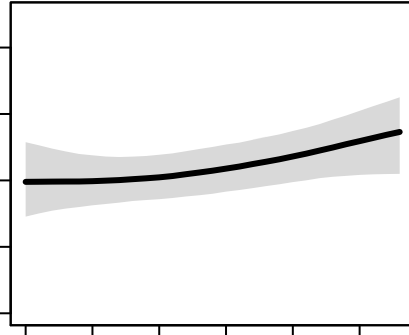

**Djibouti (male)**

East Africa subregion  
Sub-Saharan Africa region

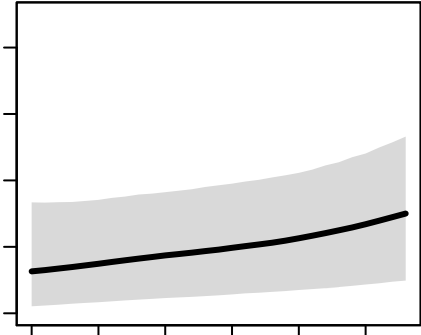

**Dominica (male)**

Caribbean subregion  
Latin America and Caribbean region

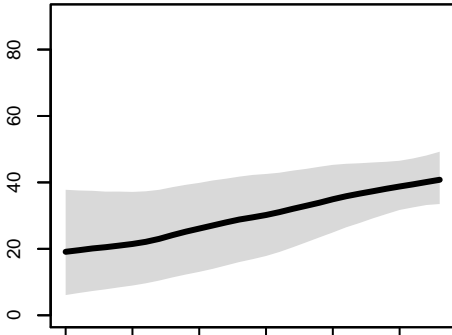

**Dominican Republic (male)**

Caribbean subregion  
Latin America and Caribbean region

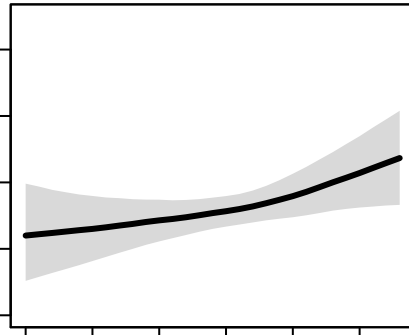

**Ecuador (male)**

Andean Latin America subregion  
Latin America and Caribbean region

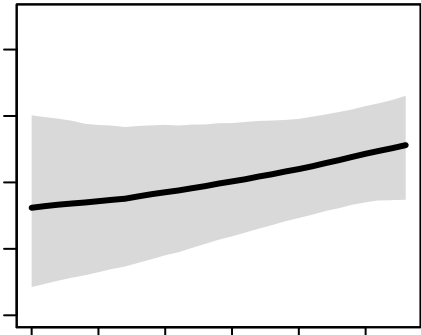

**Egypt (male)**

North Africa and Middle East subregion  
North Africa and Middle East region

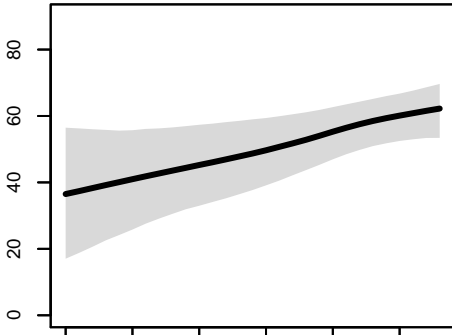

**El Salvador (male)**

Central Latin America subregion  
Latin America and Caribbean region

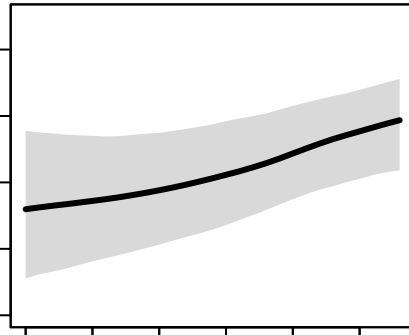

**Equatorial Guinea (male)**

Central Africa subregion  
Sub-Saharan Africa region

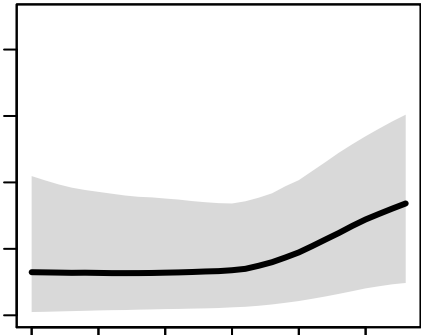

**Eritrea (male)**

East Africa subregion  
Sub-Saharan Africa region

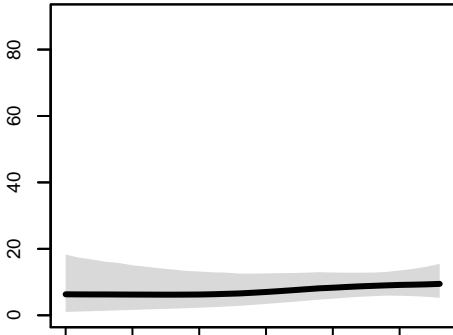

**Estonia (male)**

Eastern Europe subregion  
Central and Eastern Europe and Central Asia region

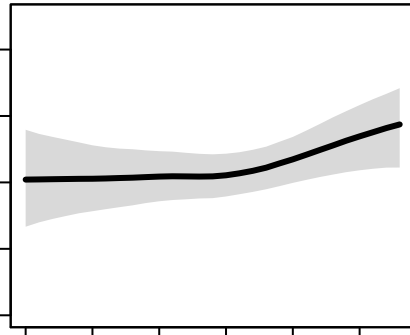

**Ethiopia (male)**

East Africa subregion  
Sub-Saharan Africa region

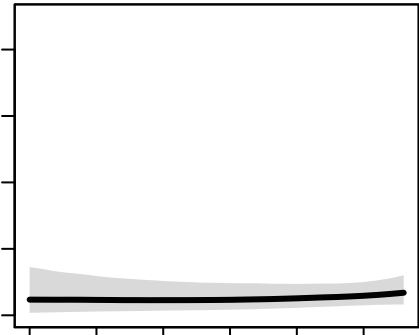

**Fiji (male)**

Oceania subregion  
East Asia and Pacific region

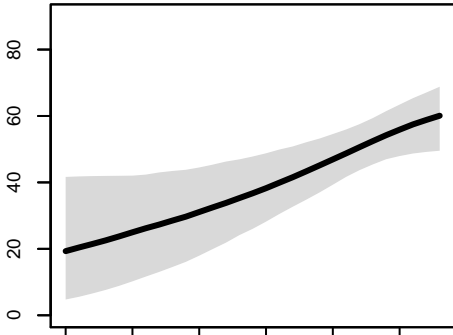

**Finland (male)**

Western Europe subregion  
High-income regions

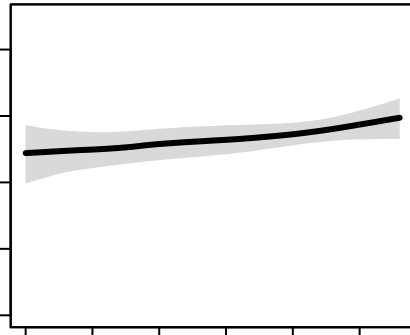

**France (male)**

Western Europe subregion  
High-income regions

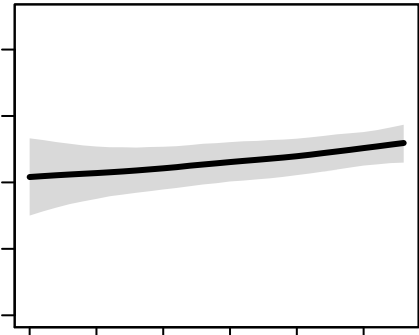

**French Polynesia (male)**

Oceania subregion  
East Asia and Pacific region

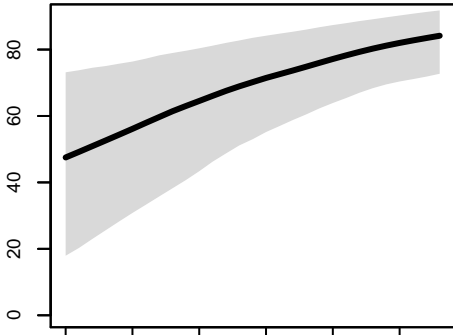

**Gabon (male)**

Central Africa subregion  
Sub-Saharan Africa region

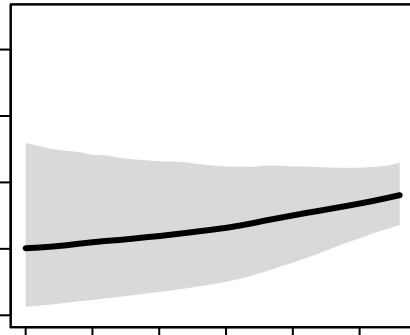

**Gambia (male)**

West Africa subregion  
Sub-Saharan Africa region

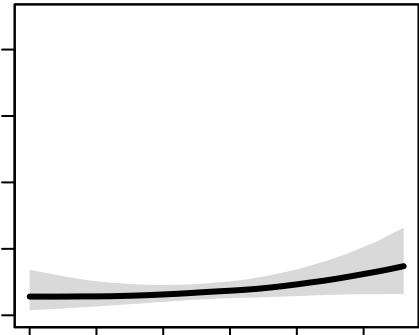

**Georgia (male)**

Central Asia subregion  
Central and Eastern Europe and Central Asia region

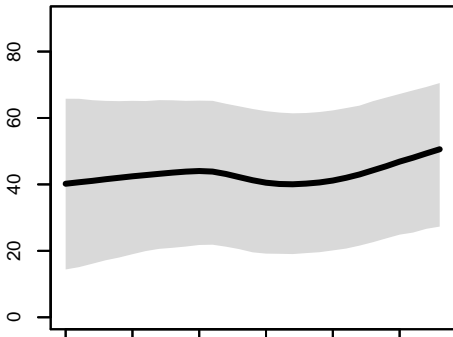

**Germany (male)**

Western Europe subregion  
High-income regions

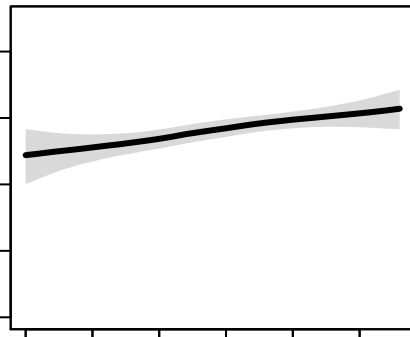

**Ghana (male)**

West Africa subregion  
Sub-Saharan Africa region

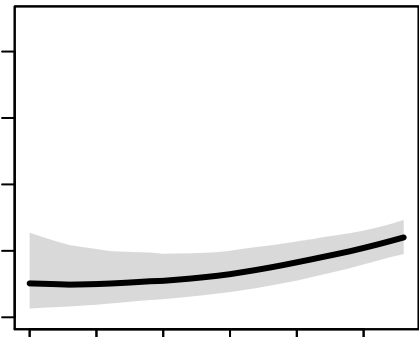

**Greece (male)**Western Europe subregion  
High-income regions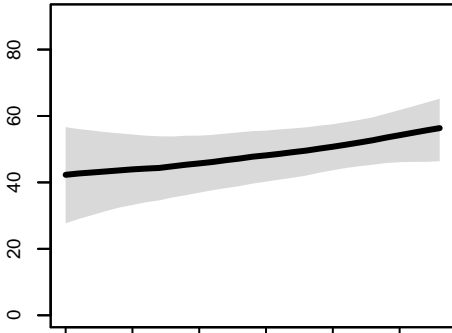**Greenland (male)**Western Europe subregion  
High-income regions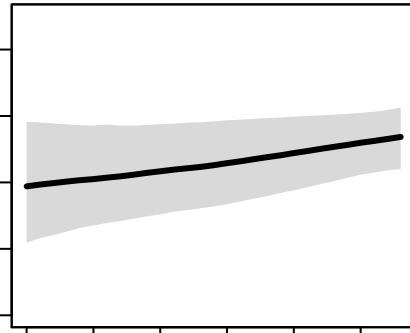**Grenada (male)**Caribbean subregion  
Latin America and Caribbean region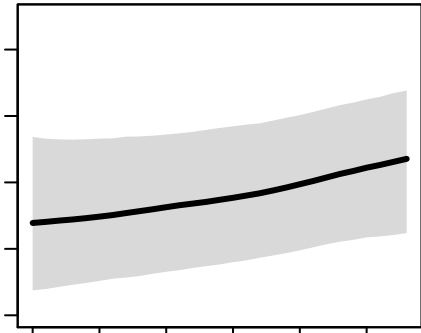**Guatemala (male)**Central Latin America subregion  
Latin America and Caribbean region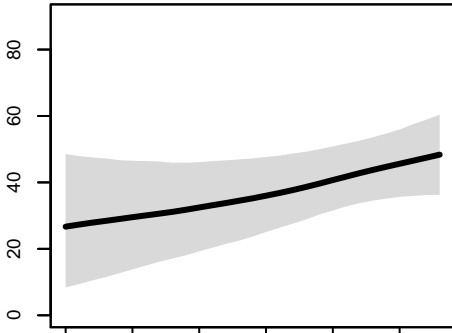**Guinea (male)**West Africa subregion  
Sub-Saharan Africa region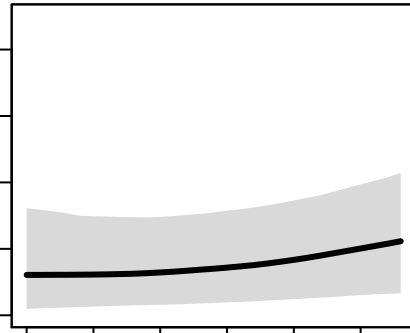**Guinea-Bissau (male)**West Africa subregion  
Sub-Saharan Africa region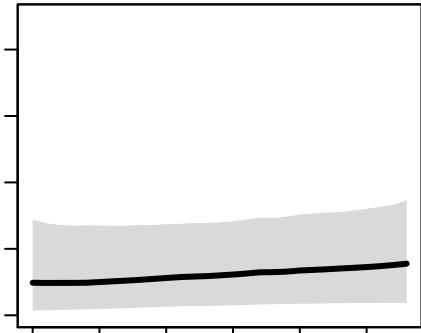**Guyana (male)**Caribbean subregion  
Latin America and Caribbean region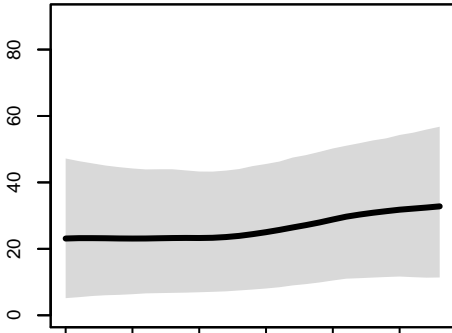**Haiti (male)**Caribbean subregion  
Latin America and Caribbean region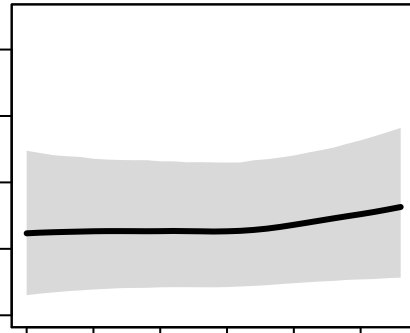**Honduras (male)**Central Latin America subregion  
Latin America and Caribbean region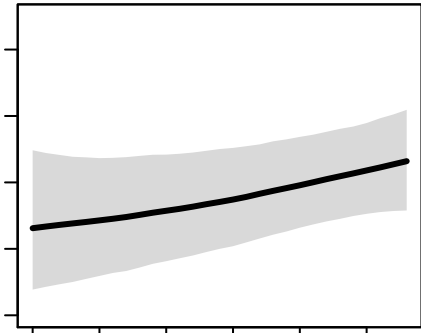**Hungary (male)**Central Europe subregion  
Central and Eastern Europe and Central Asia region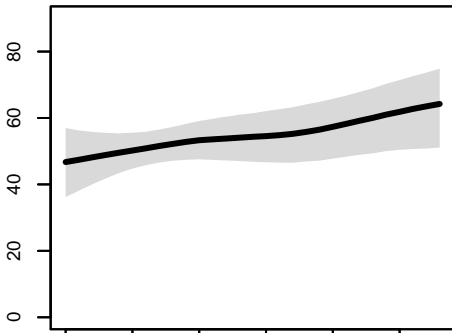**Iceland (male)**Western Europe subregion  
High-income regions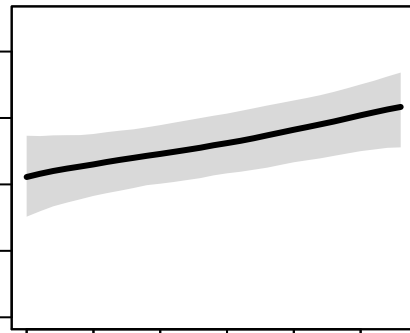**India (male)**South Asia subregion  
South Asia region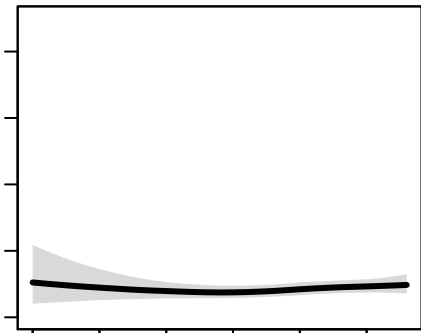



**Indonesia (male)**  
Southeast Asia subregion  
East Asia and Pacific region

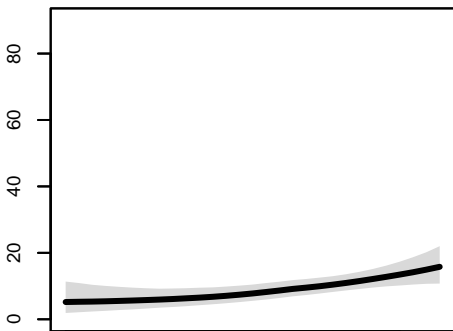

**Iran (Islamic Republic of) (male)**  
North Africa and Middle East subregion  
North Africa and Middle East region

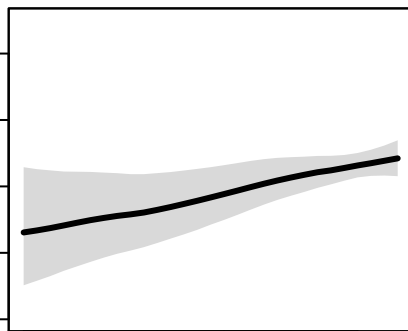

**Iraq (male)**  
North Africa and Middle East subregion  
North Africa and Middle East region

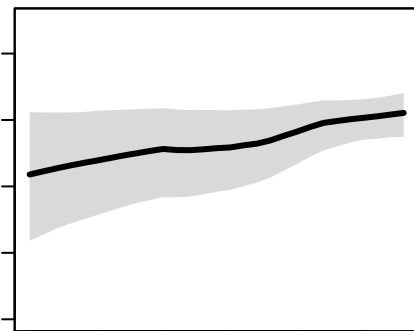

**Ireland (male)**  
Western Europe subregion  
High-income regions

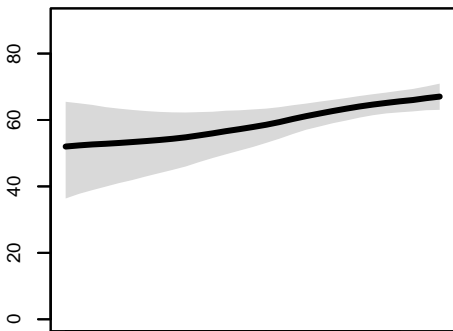

**Israel (male)**  
Western Europe subregion  
High-income regions

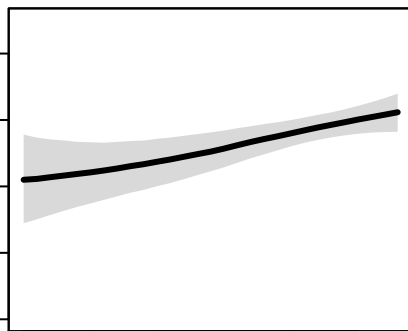

**Italy (male)**  
Western Europe subregion  
High-income regions

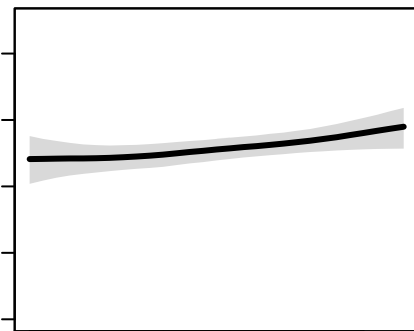

**Jamaica (male)**  
Caribbean subregion  
Latin America and Caribbean region

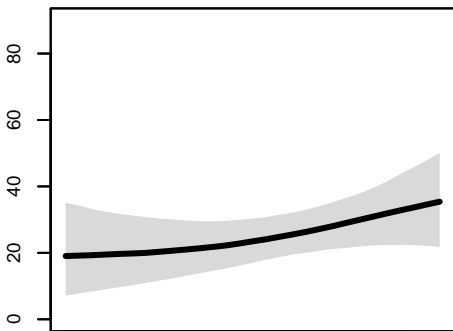

**Japan (male)**  
Asia-Pacific, high-income subregion  
High-income regions

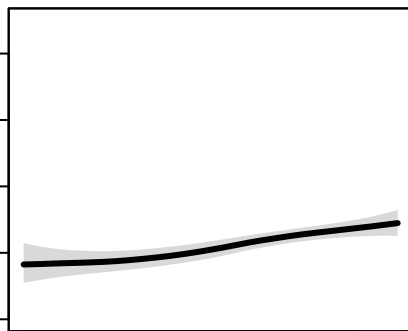

**Jordan (male)**  
North Africa and Middle East subregion  
North Africa and Middle East region

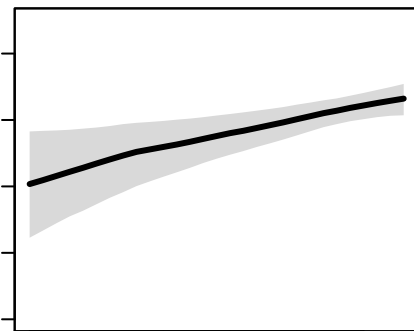

**Kazakhstan (male)**  
Central Asia subregion  
Central and Eastern Europe and Central Asia region

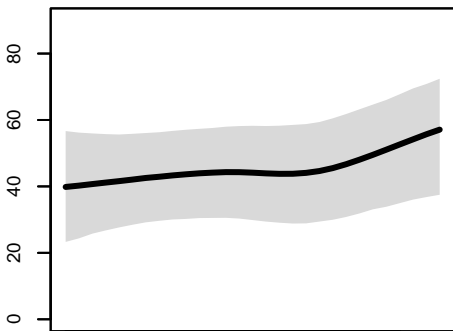

**Kenya (male)**  
East Africa subregion  
Sub-Saharan Africa region

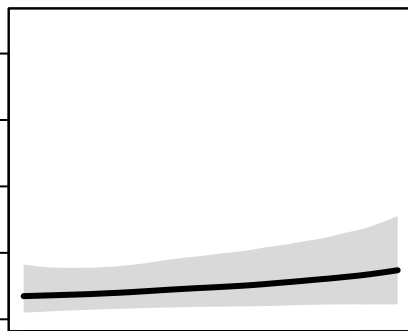

**Kiribati (male)**  
Oceania subregion  
East Asia and Pacific region

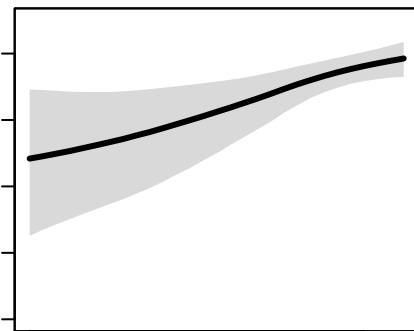

**Kuwait (male)**

North Africa and Middle East subregion  
North Africa and Middle East region

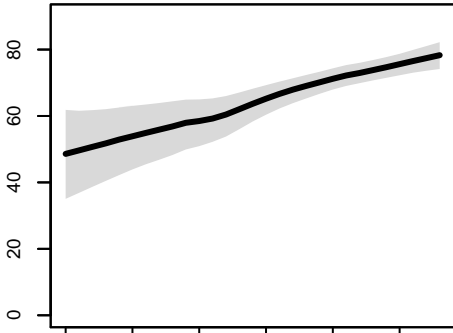**Kyrgyzstan (male)**

Central Asia subregion  
Central and Eastern Europe and Central Asia region

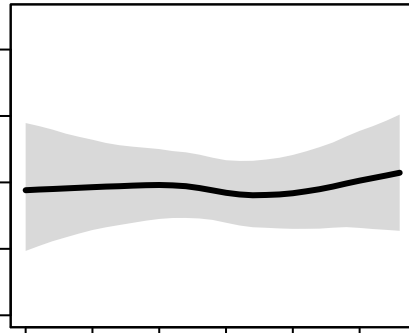**Lao People's Democratic Republic (male)**

Southeast Asia subregion  
East Asia and Pacific region

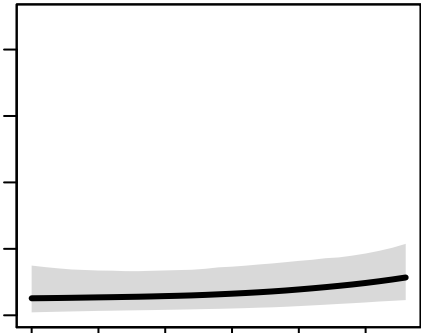**Latvia (male)**

Eastern Europe subregion  
Central and Eastern Europe and Central Asia region

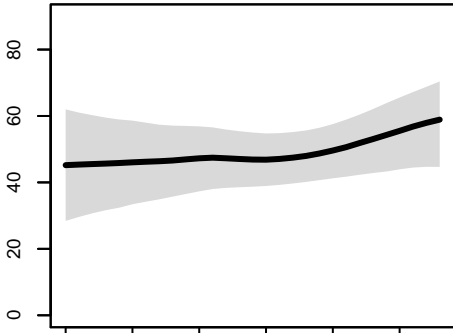**Lebanon (male)**

North Africa and Middle East subregion  
North Africa and Middle East region

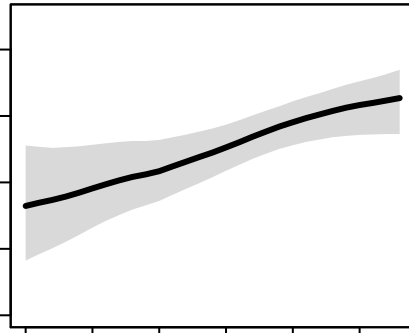**Lesotho (male)**

Southern Africa subregion  
Sub-Saharan Africa region

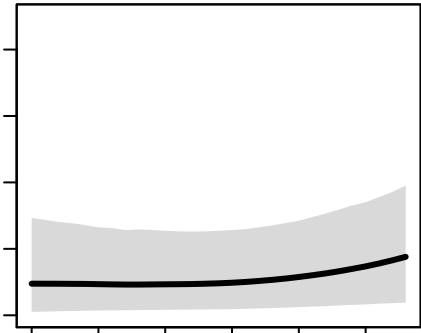**Liberia (male)**

West Africa subregion  
Sub-Saharan Africa region

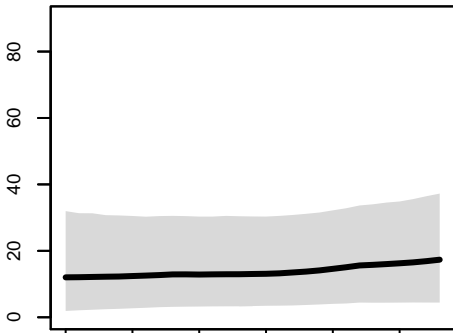**Libyan Arab Jamahiriya (male)**

North Africa and Middle East subregion  
North Africa and Middle East region

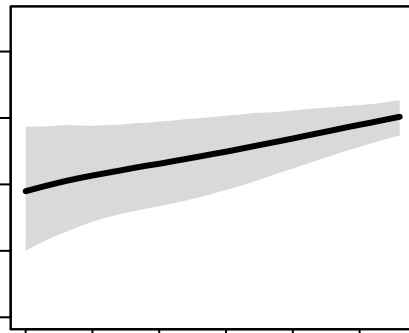**Lithuania (male)**

Eastern Europe subregion  
Central and Eastern Europe and Central Asia region

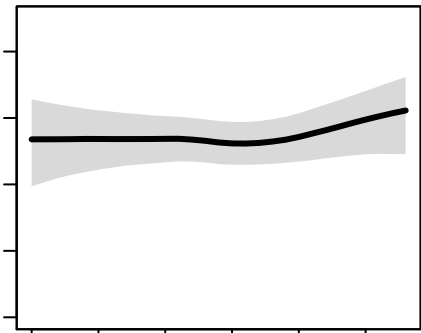**Luxembourg (male)**

Western Europe subregion  
High-income regions

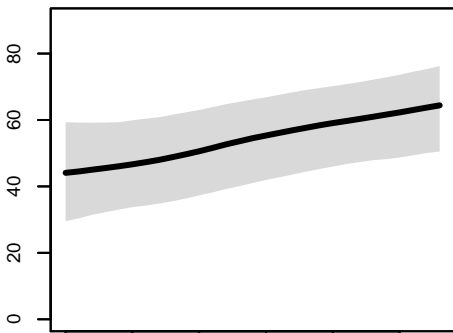**Macedonia (Former Yugoslav Republic of) (mal)**

Central Europe subregion  
Central and Eastern Europe and Central Asia region

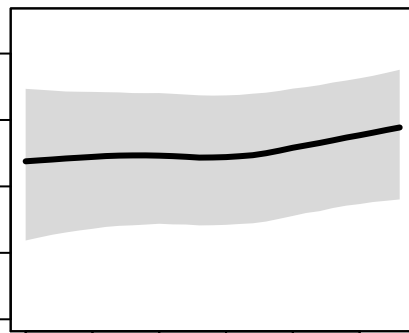**Madagascar (male)**

East Africa subregion  
Sub-Saharan Africa region

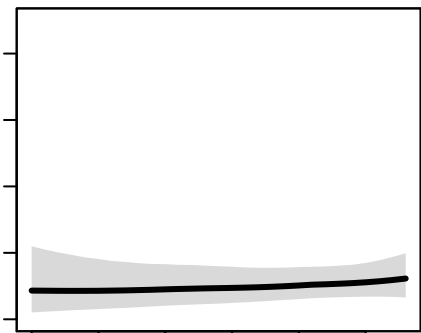

**Malawi (male)**  
East Africa subregion  
Sub-Saharan Africa region

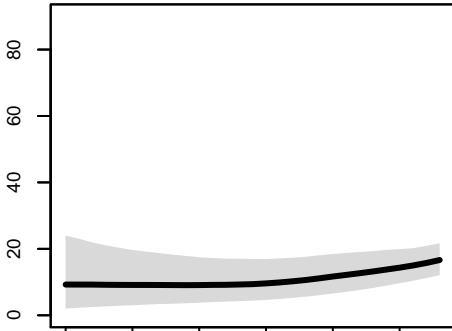

**Malaysia (male)**  
Southeast Asia subregion  
East Asia and Pacific region

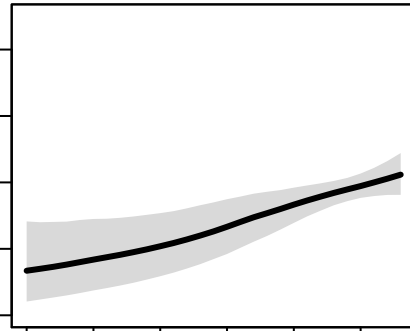

**Maldives (male)**  
Southeast Asia subregion  
East Asia and Pacific region

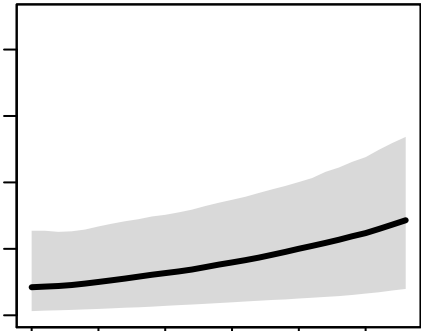

**Mali (male)**  
West Africa subregion  
Sub-Saharan Africa region

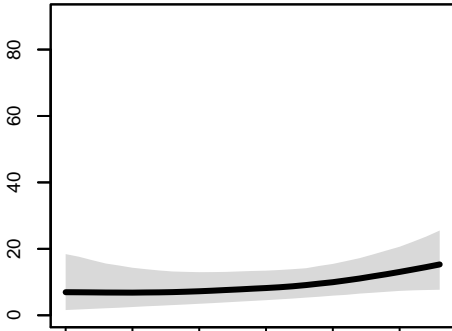

**Malta (male)**  
Western Europe subregion  
High-income regions

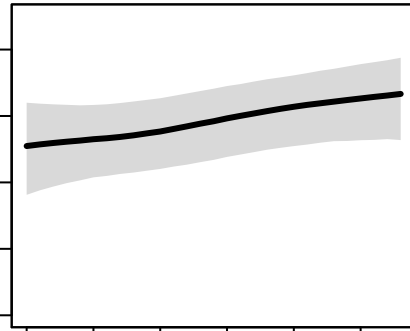

**Marshall Islands (male)**  
Oceania subregion  
East Asia and Pacific region

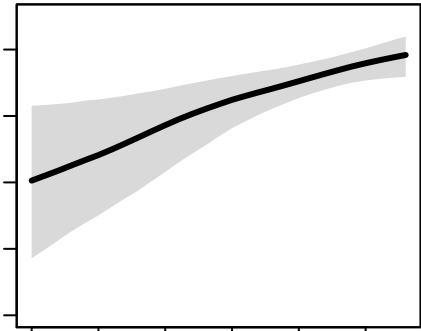

**Mauritania (male)**  
West Africa subregion  
Sub-Saharan Africa region

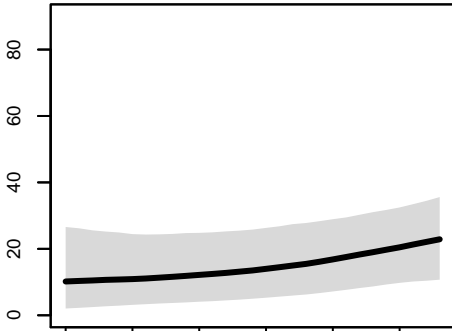

**Mauritius (male)**  
Southeast Asia subregion  
East Asia and Pacific region

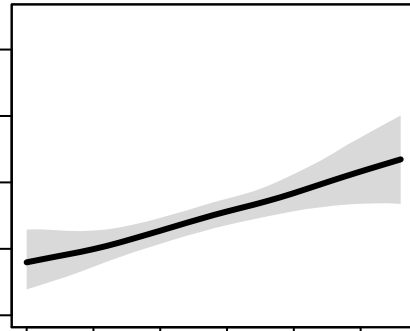

**Mexico (male)**  
Central Latin America subregion  
Latin America and Caribbean region

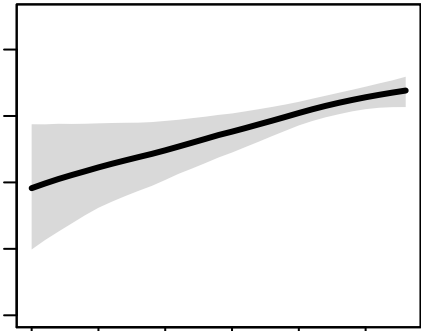

**Micronesia (Federated States of) (male)**  
Oceania subregion  
East Asia and Pacific region

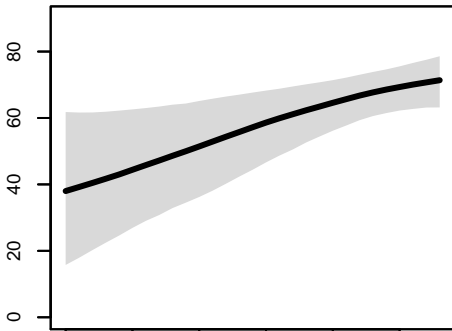

**Moldova (male)**  
Eastern Europe subregion  
Central and Eastern Europe and Central Asia region

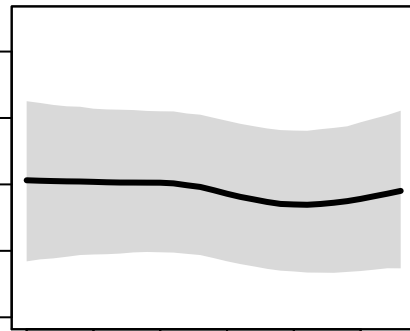

**Mongolia (male)**  
Central Asia subregion  
Central and Eastern Europe and Central Asia region

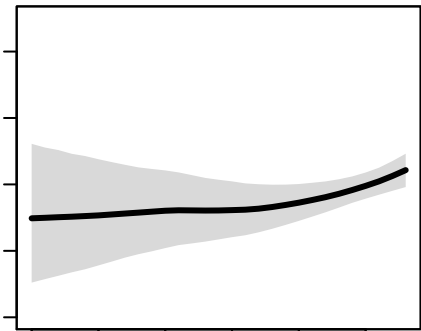

**Montenegro (male)**

Central Europe subregion

Central and Eastern Europe and Central Asia region

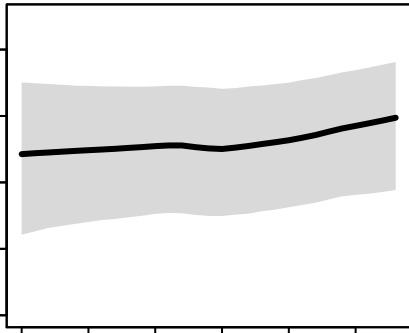

**Morocco (male)**

North Africa and Middle East subregion

North Africa and Middle East region

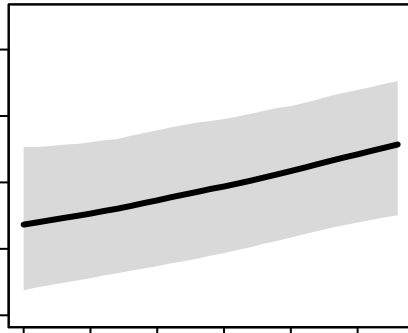

**Mozambique (male)**

East Africa subregion

Sub-Saharan Africa region

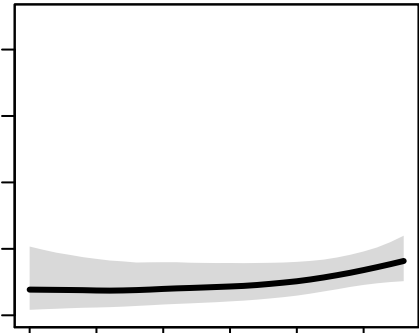

**Myanmar (male)**

Southeast Asia subregion

East Asia and Pacific region

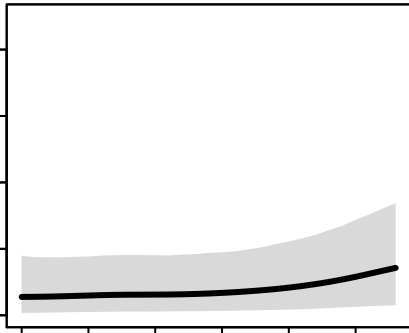

**Namibia (male)**

Southern Africa subregion

Sub-Saharan Africa region

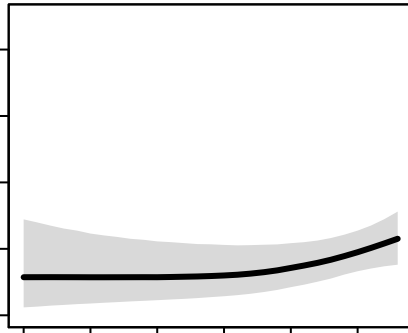

**Nauru (male)**

Oceania subregion

East Asia and Pacific region

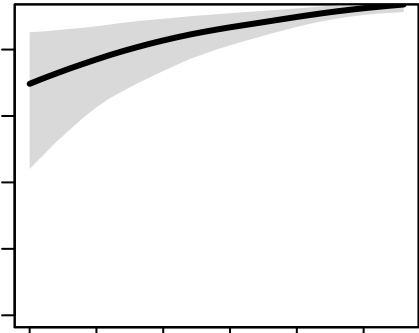

**Nepal (male)**

South Asia subregion

South Asia region

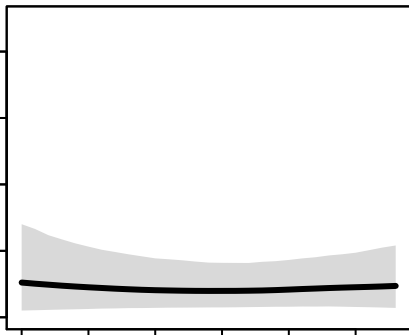

**Netherlands (male)**

Western Europe subregion

High-income regions

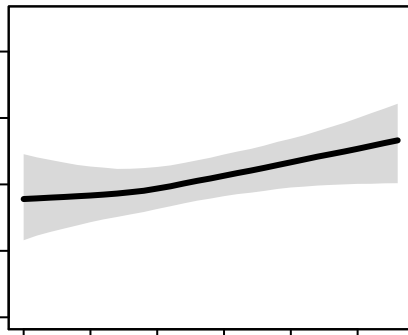

**Netherlands Antilles (male)**

Caribbean subregion

Latin America and Caribbean region

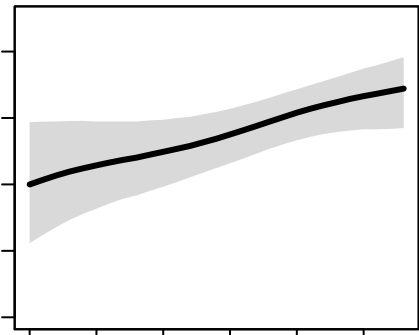

**New Zealand (male)**

Australasia subregion

High-income regions

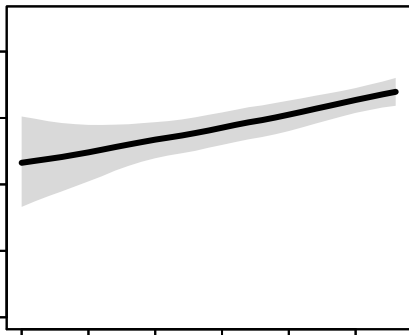

**Nicaragua (male)**

Central Latin America subregion

Latin America and Caribbean region

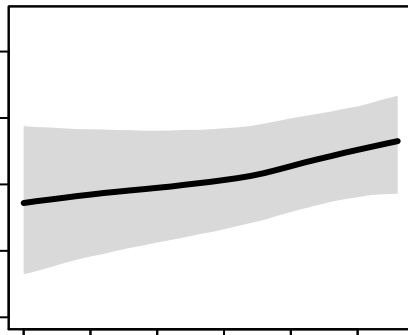

**Niger (male)**

West Africa subregion

Sub-Saharan Africa region

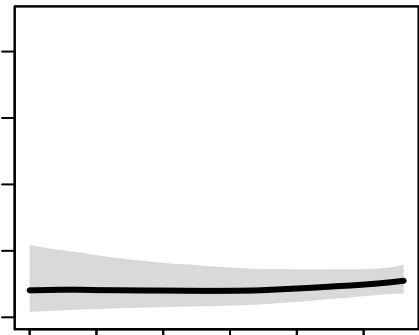

**Nigeria (male)**

West Africa subregion  
Sub-Saharan Africa region

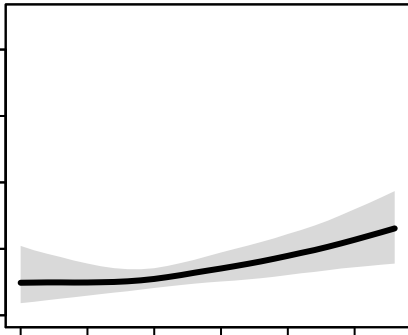

**Norway (male)**

Western Europe subregion  
High-income regions

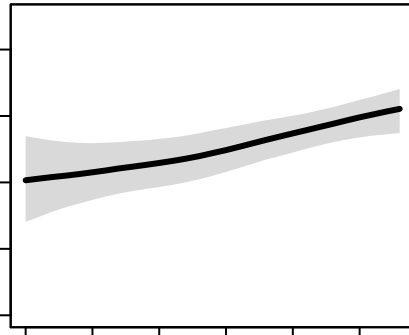

**Occupied Palestinian Territory (male)**

North Africa and Middle East subregion  
North Africa and Middle East region

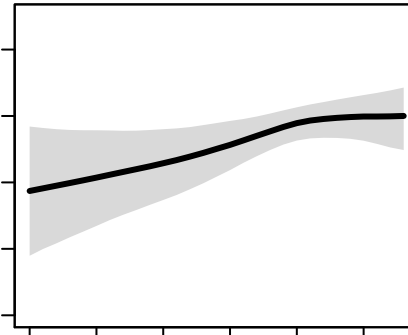

**Oman (male)**

North Africa and Middle East subregion  
North Africa and Middle East region

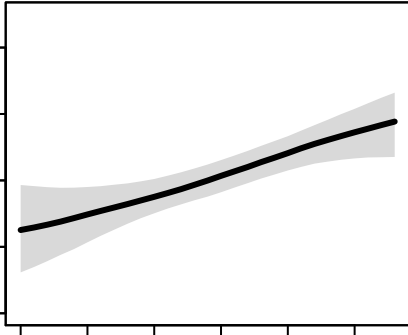

**Pakistan (male)**

South Asia subregion  
South Asia region

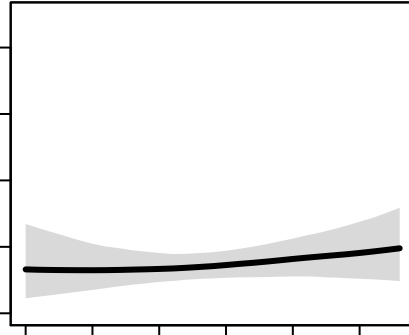

**Palau (male)**

Oceania subregion  
East Asia and Pacific region

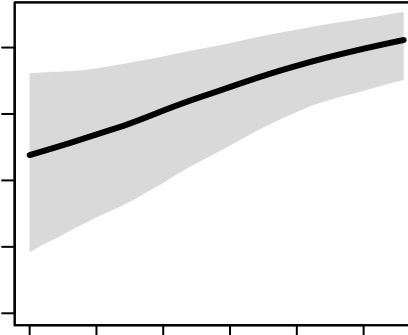

**Panama (male)**

Central Latin America subregion  
Latin America and Caribbean region

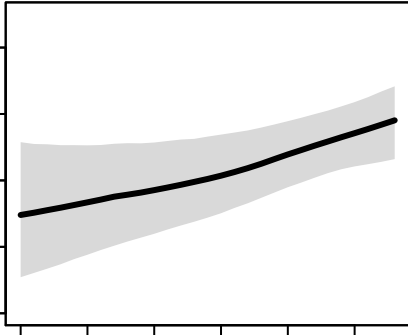

**Papua New Guinea (male)**

Oceania subregion  
East Asia and Pacific region

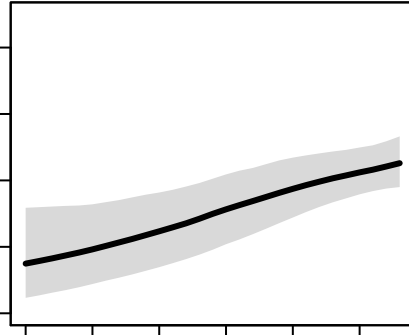

**Paraguay (male)**

Tropical Latin America subregion  
Latin America and Caribbean region

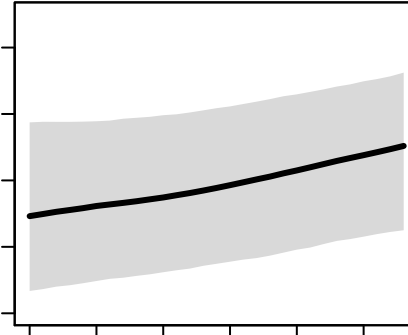

**Peru (male)**

Andean Latin America subregion  
Latin America and Caribbean region

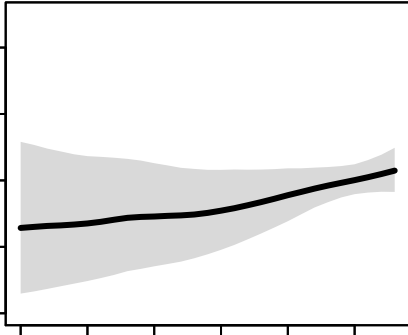

**Philippines (male)**

Southeast Asia subregion  
East Asia and Pacific region

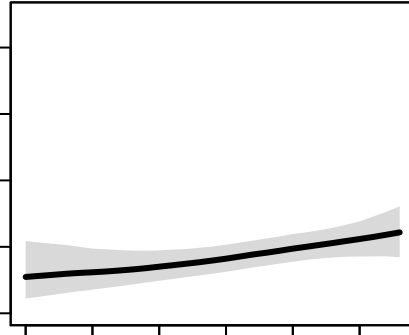

**Poland (male)**

Central Europe subregion  
Central and Eastern Europe and Central Asia region

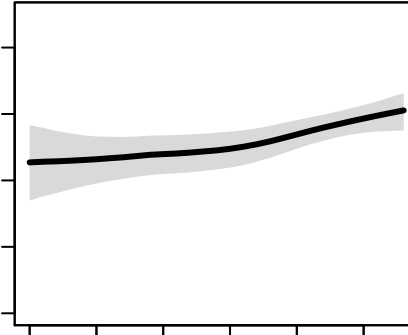

**Portugal (male)**

Western Europe subregion  
High-income regions

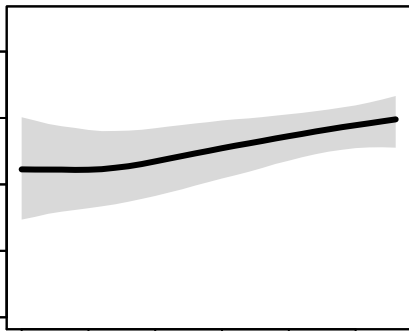

**Puerto Rico (male)**

Caribbean subregion  
Latin America and Caribbean region

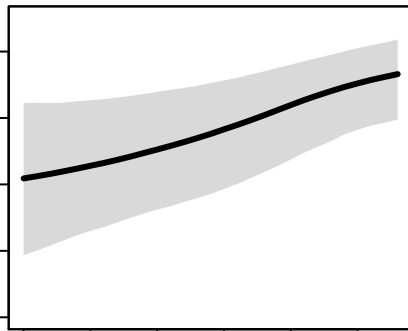

**Qatar (male)**

North Africa and Middle East subregion  
North Africa and Middle East region

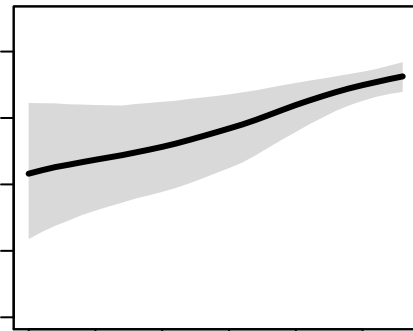

**Republic of Korea (male)**

Asia-Pacific, high-income subregion  
High-income regions

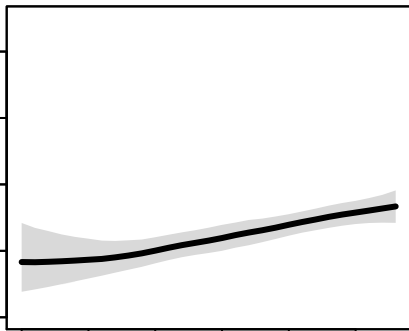

**Romania (male)**

Central Europe subregion  
Central and Eastern Europe and Central Asia region

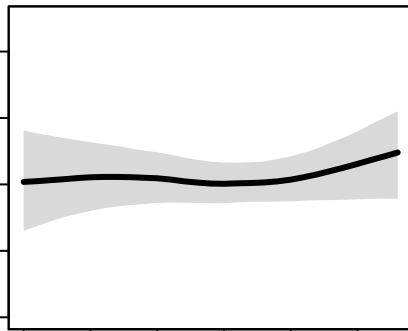

**Russian Federation (male)**

Eastern Europe subregion  
Central and Eastern Europe and Central Asia region

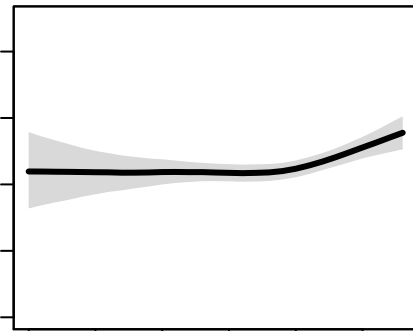

**Rwanda (male)**

East Africa subregion  
Sub-Saharan Africa region

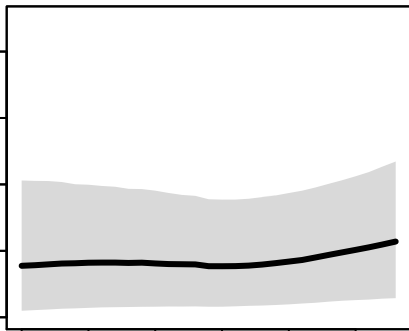

**Saint Kitts and Nevis (male)**

Caribbean subregion  
Latin America and Caribbean region

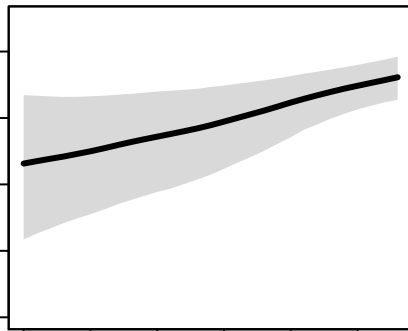

**Saint Lucia (male)**

Caribbean subregion  
Latin America and Caribbean region

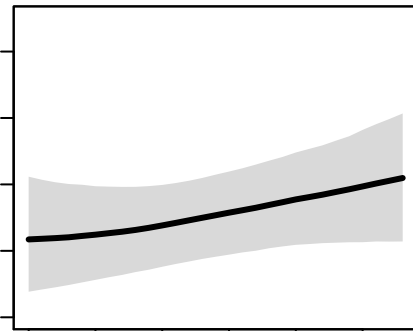

**Saint Vincent and the Grenadines (male)**

Caribbean subregion  
Latin America and Caribbean region

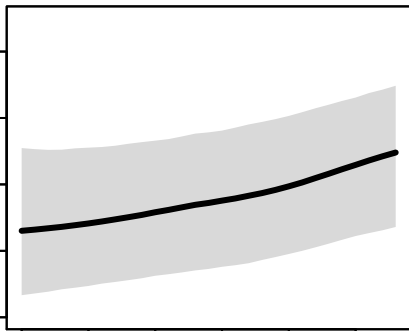

**Samoa (male)**

Oceania subregion  
East Asia and Pacific region

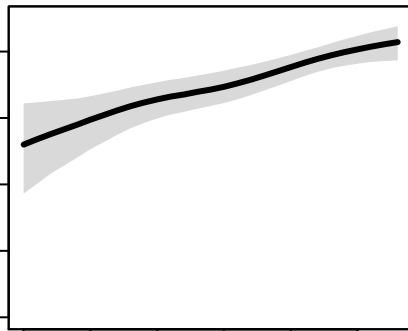

**Sao Tome and Principe (male)**

West Africa subregion  
Sub-Saharan Africa region

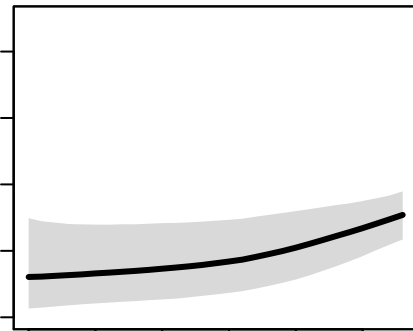

1980 1985 1990 1995 2000 2005

1980 1985 1990 1995 2000 2005

1980 1985 1990 1995 2000 2005

**Saudi Arabia (male)**

North Africa and Middle East subregion  
North Africa and Middle East region

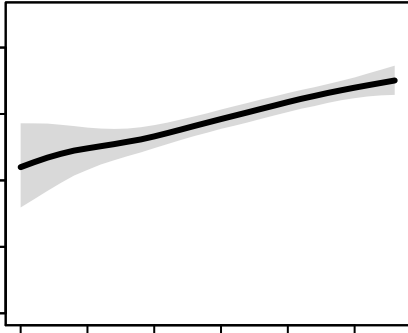

**Senegal (male)**

West Africa subregion  
Sub-Saharan Africa region

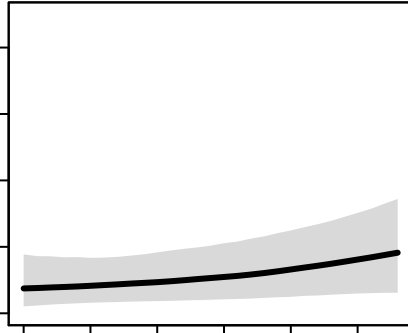

**Serbia (male)**

Central Europe subregion  
Central and Eastern Europe and Central Asia region

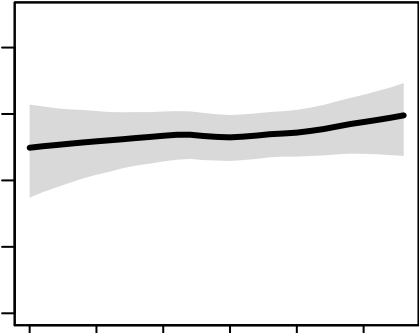

**Seychelles (male)**

Southeast Asia subregion  
East Asia and Pacific region

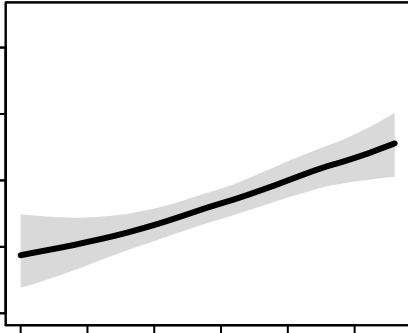

**Sierra Leone (male)**

West Africa subregion  
Sub-Saharan Africa region

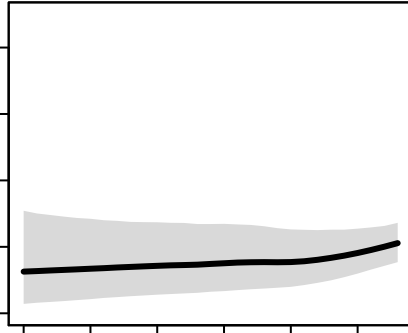

**Singapore (male)**

Asia-Pacific, high-income subregion  
High-income regions

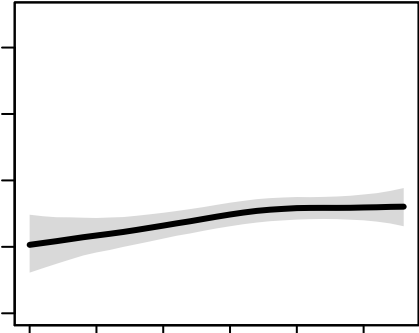

**Slovakia (male)**

Central Europe subregion  
Central and Eastern Europe and Central Asia region

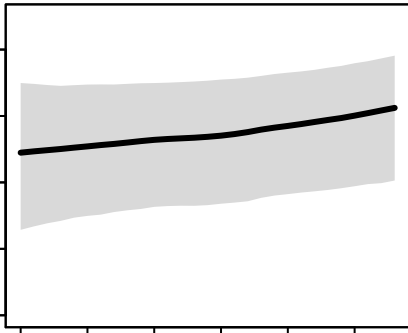

**Slovenia (male)**

Central Europe subregion  
Central and Eastern Europe and Central Asia region

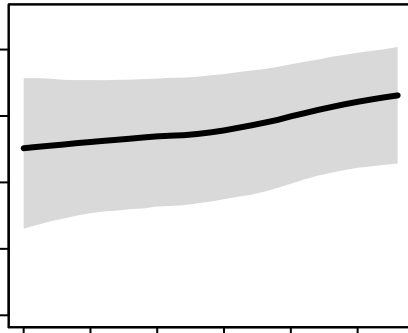

**Solomon Islands (male)**

Oceania subregion  
East Asia and Pacific region

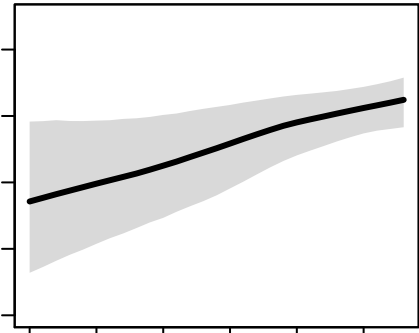

**Somalia (male)**

East Africa subregion  
Sub-Saharan Africa region

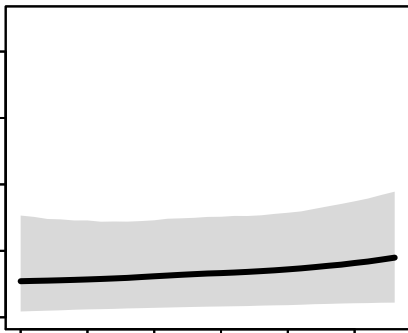

**South Africa (male)**

Southern Africa subregion  
Sub-Saharan Africa region

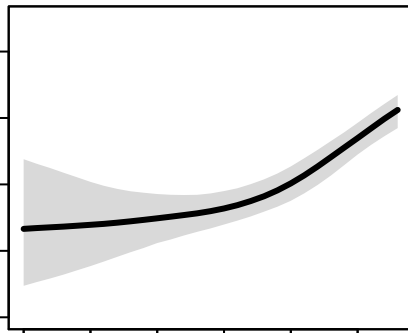

**Spain (male)**

Western Europe subregion  
High-income regions

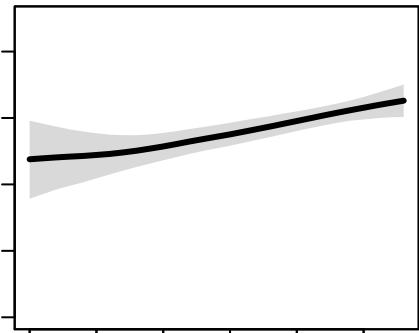

1980 1985 1990 1995 2000 2005

1980 1985 1990 1995 2000 2005

1980 1985 1990 1995 2000 2005

**Sri Lanka (male)**  
Southeast Asia subregion  
East Asia and Pacific region

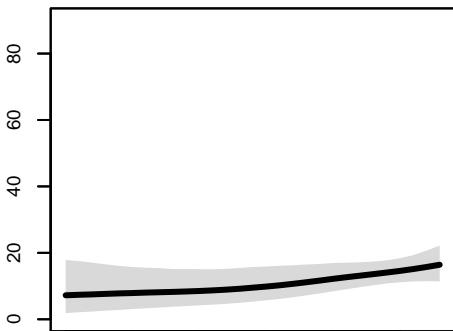

**Sudan (male)**  
East Africa subregion  
Sub-Saharan Africa region

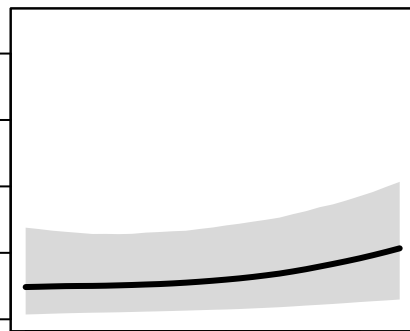

**Suriname (male)**  
Caribbean subregion  
Latin America and Caribbean region

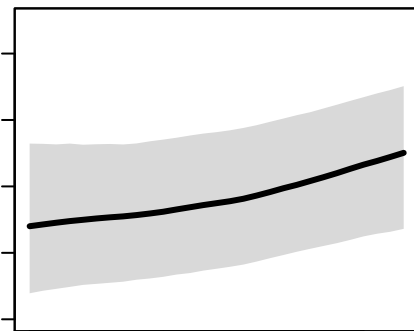

**Swaziland (male)**  
Southern Africa subregion  
Sub-Saharan Africa region

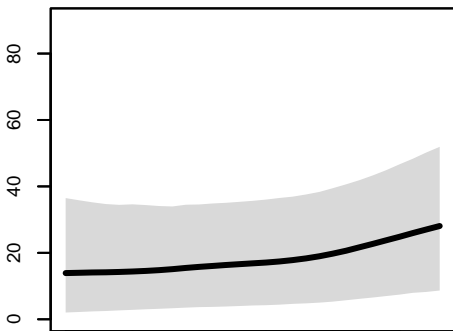

**Sweden (male)**  
Western Europe subregion  
High-income regions

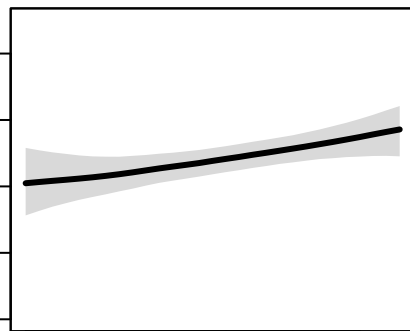

**Switzerland (male)**  
Western Europe subregion  
High-income regions

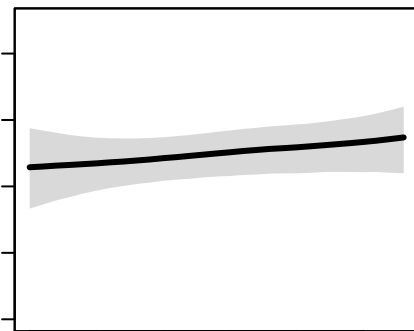

**Syrian Arab Republic (male)**  
North Africa and Middle East subregion  
North Africa and Middle East region

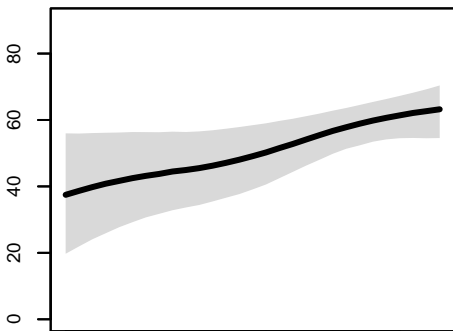

**Taiwan (male)**  
East Asia subregion  
East Asia and Pacific region

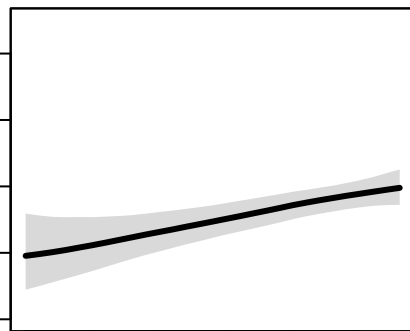

**Tajikistan (male)**  
Central Asia subregion  
Central and Eastern Europe and Central Asia region

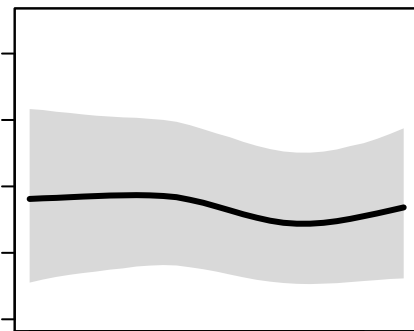

**Thailand (male)**  
Southeast Asia subregion  
East Asia and Pacific region

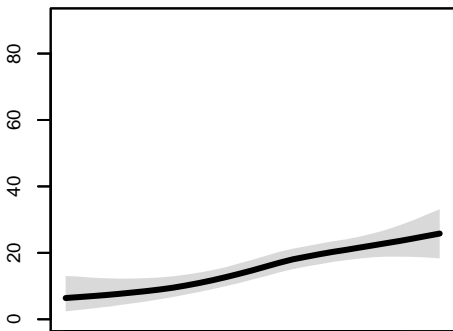

**Timor-Leste (male)**  
Southeast Asia subregion  
East Asia and Pacific region

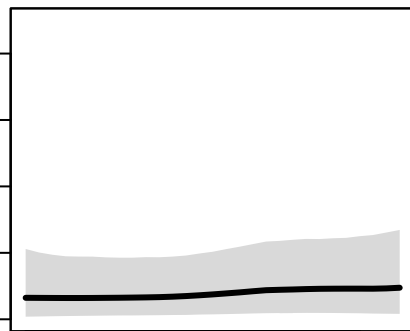

**Togo (male)**  
West Africa subregion  
Sub-Saharan Africa region

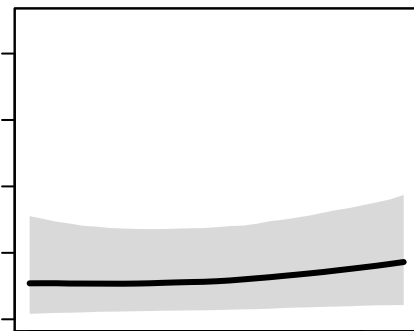



**Tonga (male)**  
Oceania subregion  
East Asia and Pacific region

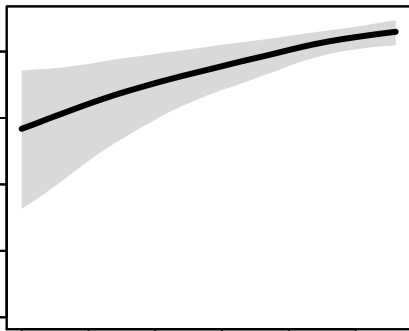

**Trinidad and Tobago (male)**  
Caribbean subregion  
Latin America and Caribbean region

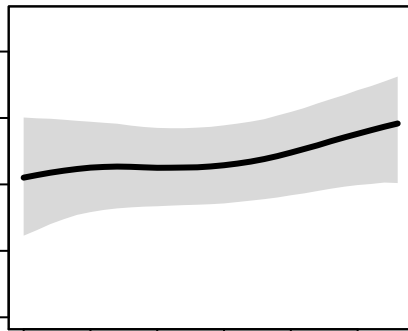

**Tunisia (male)**  
North Africa and Middle East subregion  
North Africa and Middle East region

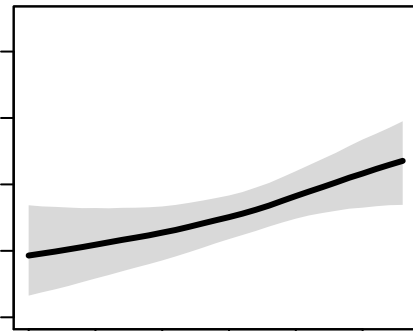

**Turkey (male)**  
North Africa and Middle East subregion  
North Africa and Middle East region

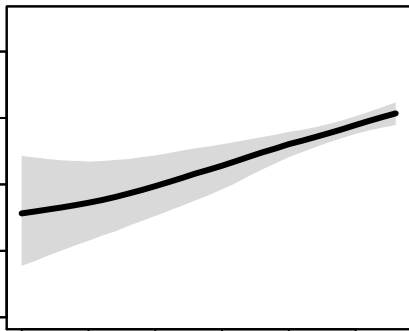

**Turkmenistan (male)**  
Central Asia subregion  
Central and Eastern Europe and Central Asia region

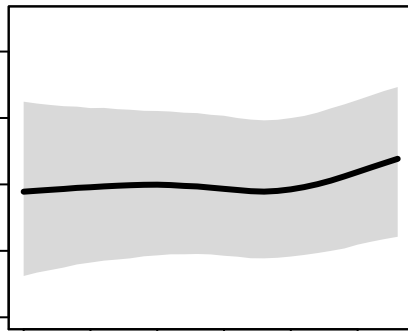

**Uganda (male)**  
East Africa subregion  
Sub-Saharan Africa region

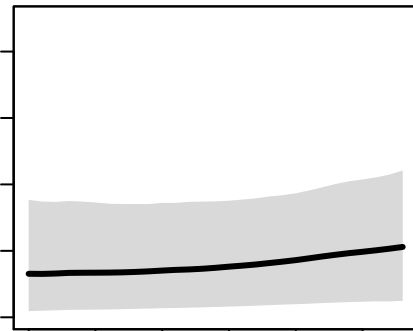

**Ukraine (male)**  
Eastern Europe subregion  
Central and Eastern Europe and Central Asia region

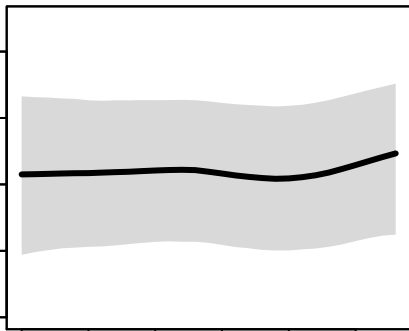

**United Arab Emirates (male)**  
North Africa and Middle East subregion  
North Africa and Middle East region

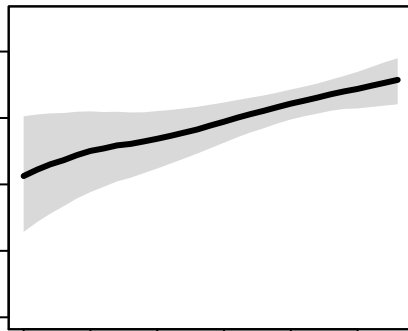

**United Kingdom (male)**  
Western Europe subregion  
High-income regions

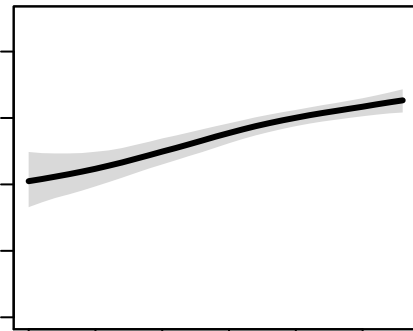

**United Republic of Tanzania (male)**  
East Africa subregion  
Sub-Saharan Africa region

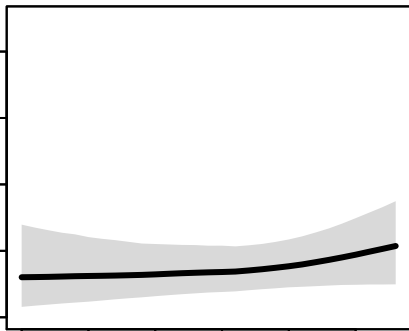

**United States of America (male)**  
North America, high-income subregion  
High-income regions

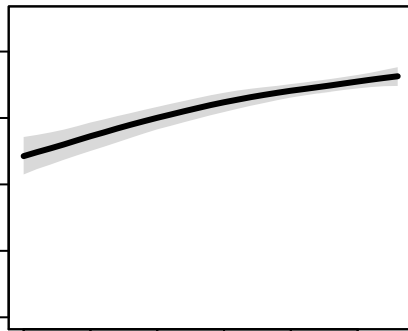

**Uruguay (male)**  
Southern Latin America subregion  
Latin America and Caribbean region

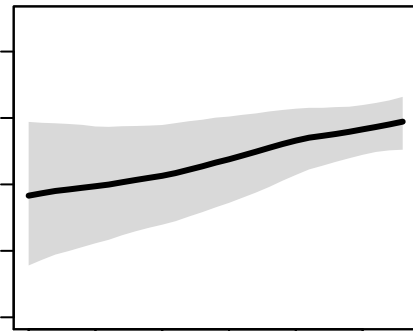

**Uzbekistan (male)**

Central Asia subregion

Central and Eastern Europe and Central Asia region

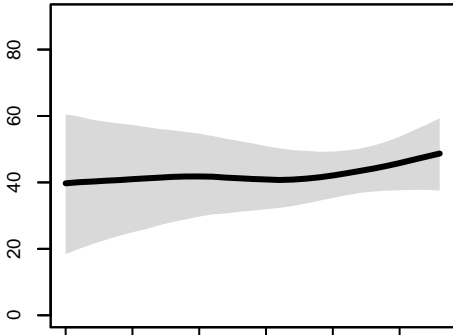

**Vanuatu (male)**

Oceania subregion

East Asia and Pacific region

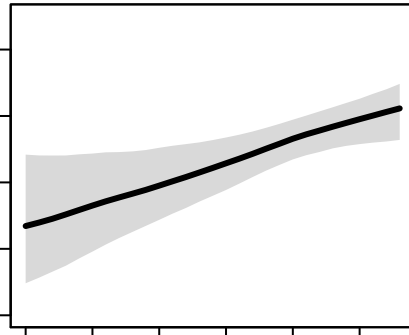

**Venezuela (Bolivarian Republic of) (male)**

Central Latin America subregion

Latin America and Caribbean region

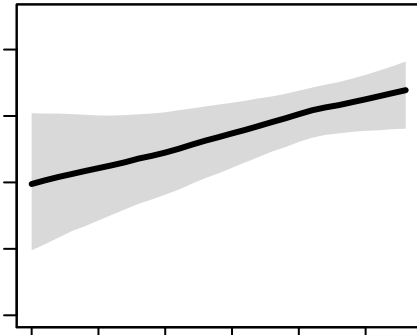

**Viet Nam (male)**

Southeast Asia subregion

East Asia and Pacific region

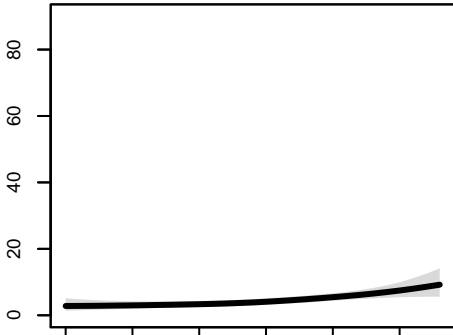

**Yemen (male)**

North Africa and Middle East subregion

North Africa and Middle East region

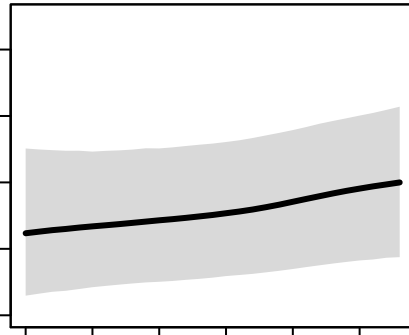

**Zambia (male)**

East Africa subregion

Sub-Saharan Africa region

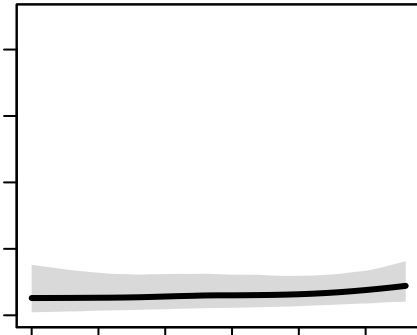

**Zimbabwe (male)**

Southern Africa subregion

Sub-Saharan Africa region

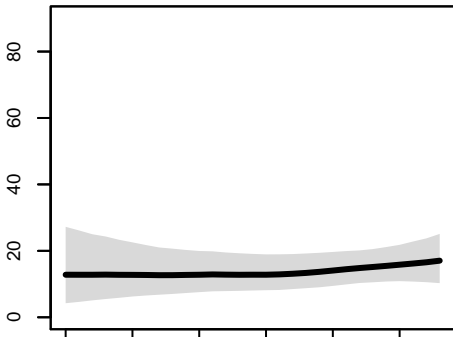

Supplement: 1478-7954-10-22-S2.pdf [file 1478-7954-10-22-S2.pdf]
